# Supplementary material for: A transcriptomic insight into the infective juvenile stage of the insect parasitic nematode, Heterorhabditis indica
Source: BMC Genomics. 2016 Mar 1;17:166. doi: 10.1186/s12864-016-2510-z (PMC4774024; doi:10.1186/s12864-016-2510-z)
Supplement: Additional file 6: Table S5a. — H. indica secretome prediction by SignalP. (XLSX 90 kb) [file 12864_2016_2510_MOESM6_ESM.xlsx]

## Sheet: Sheet1
H. indica secretome prediction by SignalP
H. Indica locus ID	Interpro ID	Annotation
HINDICA_D_16687_Transcript_1/1_m.76960_len:77	IPR008250	P-type ATPase, A domain
HINDICA_D_6986_Transcript_1/1_m.136680_len:77	IPR008250	P-type ATPase, A domain
HINDICA_D_4365_Transcript_2/9_m.114154_len:368	IPR006026	Peptidase, metallopeptidase
HINDICA_D_4365_Transcript_2/9_m.114154_len:368	IPR002477	Peptidoglycan binding-like
HINDICA_D_4365_Transcript_2/9_m.114154_len:368	IPR001818	Peptidase M10, metallopeptidase
HINDICA_D_4365_Transcript_2/9_m.114154_len:368	IPR024079	Metallopeptidase, catalytic domain
HINDICA_D_4365_Transcript_2/9_m.114154_len:368	IPR002477	Peptidoglycan binding-like
HINDICA_D_4365_Transcript_2/9_m.114154_len:368	IPR021190	Peptidase M10A
HINDICA_D_4365_Transcript_6/9_m.149906_len:368	IPR006026	Peptidase, metallopeptidase
HINDICA_D_4365_Transcript_6/9_m.149906_len:368	IPR002477	Peptidoglycan binding-like
HINDICA_D_4365_Transcript_6/9_m.149906_len:368	IPR001818	Peptidase M10, metallopeptidase
HINDICA_D_4365_Transcript_6/9_m.149906_len:368	IPR024079	Metallopeptidase, catalytic domain
HINDICA_D_4365_Transcript_6/9_m.149906_len:368	IPR002477	Peptidoglycan binding-like
HINDICA_D_4365_Transcript_6/9_m.149906_len:368	IPR021190	Peptidase M10A
HINDICA_D_6055_Transcript_1/1_m.93823_len:1821	IPR009030	Insulin-like growth factor binding protein, N-terminal
HINDICA_D_6055_Transcript_1/1_m.93823_len:1821	IPR000800	Notch domain
HINDICA_D_6055_Transcript_1/1_m.93823_len:1821	IPR013032	EGF-like, conserved site
HINDICA_D_6055_Transcript_1/1_m.93823_len:1821	IPR020683	Ankyrin repeat-containing domain
HINDICA_D_6055_Transcript_1/1_m.93823_len:1821	IPR013032	EGF-like, conserved site
HINDICA_D_6055_Transcript_1/1_m.93823_len:1821	IPR000800	Notch domain
HINDICA_D_6055_Transcript_1/1_m.93823_len:1821	IPR020683	Ankyrin repeat-containing domain
HINDICA_D_6055_Transcript_1/1_m.93823_len:1821	IPR013032	EGF-like, conserved site
HINDICA_D_6055_Transcript_1/1_m.93823_len:1821	IPR001881	EGF-like calcium-binding domain
HINDICA_D_6055_Transcript_1/1_m.93823_len:1821	IPR013032	EGF-like, conserved site
HINDICA_D_6055_Transcript_1/1_m.93823_len:1821	IPR000800	Notch domain
HINDICA_D_6055_Transcript_1/1_m.93823_len:1821	IPR000152	EGF-type aspartate/asparagine hydroxylation site
HINDICA_D_6055_Transcript_1/1_m.93823_len:1821	IPR013032	EGF-like, conserved site
HINDICA_D_6055_Transcript_1/1_m.93823_len:1821	IPR000800	Notch domain
HINDICA_D_6055_Transcript_1/1_m.93823_len:1821	IPR018097	EGF-like calcium-binding, conserved site
HINDICA_D_6055_Transcript_1/1_m.93823_len:1821	IPR013032	EGF-like, conserved site
HINDICA_D_6055_Transcript_1/1_m.93823_len:1821	IPR000742	Epidermal growth factor-like domain
HINDICA_D_6055_Transcript_1/1_m.93823_len:1821	IPR013032	EGF-like, conserved site
HINDICA_D_6055_Transcript_1/1_m.93823_len:1821	IPR000152	EGF-type aspartate/asparagine hydroxylation site
HINDICA_D_6055_Transcript_1/1_m.93823_len:1821	IPR000800	Notch domain
HINDICA_D_6055_Transcript_1/1_m.93823_len:1821	IPR000742	Epidermal growth factor-like domain
HINDICA_D_6055_Transcript_1/1_m.93823_len:1821	IPR000800	Notch domain
HINDICA_D_6055_Transcript_1/1_m.93823_len:1821	IPR000742	Epidermal growth factor-like domain
HINDICA_D_6055_Transcript_1/1_m.93823_len:1821	IPR000152	EGF-type aspartate/asparagine hydroxylation site
HINDICA_D_6055_Transcript_1/1_m.93823_len:1821	IPR000800	Notch domain
HINDICA_D_6055_Transcript_1/1_m.93823_len:1821	IPR009030	Insulin-like growth factor binding protein, N-terminal
HINDICA_D_6055_Transcript_1/1_m.93823_len:1821	IPR002110	Ankyrin repeat
HINDICA_D_6055_Transcript_1/1_m.93823_len:1821	IPR013032	EGF-like, conserved site
HINDICA_D_6055_Transcript_1/1_m.93823_len:1821	IPR000742	Epidermal growth factor-like domain
HINDICA_D_6055_Transcript_1/1_m.93823_len:1821	IPR002110	Ankyrin repeat
HINDICA_D_6055_Transcript_1/1_m.93823_len:1821	IPR013032	EGF-like, conserved site
HINDICA_D_6055_Transcript_1/1_m.93823_len:1821	IPR000742	Epidermal growth factor-like domain
HINDICA_D_6055_Transcript_1/1_m.93823_len:1821	IPR000800	Notch domain
HINDICA_D_6055_Transcript_1/1_m.93823_len:1821	IPR013032	EGF-like, conserved site
HINDICA_D_6055_Transcript_1/1_m.93823_len:1821	IPR011656	Notch, NODP domain
HINDICA_D_6055_Transcript_1/1_m.93823_len:1821	IPR018097	EGF-like calcium-binding, conserved site
HINDICA_D_6055_Transcript_1/1_m.93823_len:1821	IPR013032	EGF-like, conserved site
HINDICA_D_6055_Transcript_1/1_m.93823_len:1821	IPR020683	Ankyrin repeat-containing domain
HINDICA_D_6055_Transcript_1/1_m.93823_len:1821	IPR000742	Epidermal growth factor-like domain
HINDICA_D_6055_Transcript_1/1_m.93823_len:1821	IPR002110	Ankyrin repeat
HINDICA_D_6055_Transcript_1/1_m.93823_len:1821	IPR000742	Epidermal growth factor-like domain
HINDICA_D_6055_Transcript_1/1_m.93823_len:1821	IPR013032	EGF-like, conserved site
HINDICA_D_6055_Transcript_1/1_m.93823_len:1821	IPR020683	Ankyrin repeat-containing domain
HINDICA_D_6055_Transcript_1/1_m.93823_len:1821	IPR000742	Epidermal growth factor-like domain
HINDICA_D_6055_Transcript_1/1_m.93823_len:1821	IPR013032	EGF-like, conserved site
HINDICA_D_6055_Transcript_1/1_m.93823_len:1821	IPR000152	EGF-type aspartate/asparagine hydroxylation site
HINDICA_D_6055_Transcript_1/1_m.93823_len:1821	IPR013032	EGF-like, conserved site
HINDICA_D_6055_Transcript_1/1_m.93823_len:1821	IPR002110	Ankyrin repeat
HINDICA_D_6055_Transcript_1/1_m.93823_len:1821	IPR000800	Notch domain
HINDICA_D_6055_Transcript_1/1_m.93823_len:1821	IPR000742	Epidermal growth factor-like domain
HINDICA_D_6055_Transcript_1/1_m.93823_len:1821	IPR013032	EGF-like, conserved site
HINDICA_D_6055_Transcript_1/1_m.93823_len:1821	IPR000152	EGF-type aspartate/asparagine hydroxylation site
HINDICA_D_6055_Transcript_1/1_m.93823_len:1821	IPR000742	Epidermal growth factor-like domain
HINDICA_D_6055_Transcript_1/1_m.93823_len:1821	IPR001881	EGF-like calcium-binding domain
HINDICA_D_7089_Transcript_2/2_m.162211_len:235	IPR001079	Galectin, carbohydrate recognition domain
HINDICA_D_7089_Transcript_2/2_m.162211_len:235	IPR008985	Concanavalin A-like lectin/glucanases superfamily
HINDICA_D_7089_Transcript_2/2_m.162211_len:235	IPR013320	Concanavalin A-like lectin/glucanase, subgroup
HINDICA_D_7089_Transcript_2/2_m.162211_len:235	IPR001079	Galectin, carbohydrate recognition domain
HINDICA_D_5491_Transcript_3/4_m.101579_len:2503	IPR013032	EGF-like, conserved site
HINDICA_D_5491_Transcript_3/4_m.101579_len:2503	IPR002049	EGF-like, laminin
HINDICA_D_5491_Transcript_3/4_m.101579_len:2503	IPR000034	Laminin B type IV
HINDICA_D_5491_Transcript_3/4_m.101579_len:2503	IPR002049	EGF-like, laminin
HINDICA_D_5491_Transcript_3/4_m.101579_len:2503	IPR013032	EGF-like, conserved site
HINDICA_D_5491_Transcript_3/4_m.101579_len:2503	IPR002049	EGF-like, laminin
HINDICA_D_5491_Transcript_3/4_m.101579_len:2503	IPR013032	EGF-like, conserved site
HINDICA_D_5491_Transcript_3/4_m.101579_len:2503	IPR002049	EGF-like, laminin
HINDICA_D_5491_Transcript_3/4_m.101579_len:2503	IPR013032	EGF-like, conserved site
HINDICA_D_5491_Transcript_3/4_m.101579_len:2503	IPR002049	EGF-like, laminin
HINDICA_D_5491_Transcript_3/4_m.101579_len:2503	IPR000034	Laminin B type IV
HINDICA_D_5491_Transcript_3/4_m.101579_len:2503	IPR013032	EGF-like, conserved site
HINDICA_D_5491_Transcript_3/4_m.101579_len:2503	IPR002049	EGF-like, laminin
HINDICA_D_5491_Transcript_3/4_m.101579_len:2503	IPR013032	EGF-like, conserved site
HINDICA_D_5491_Transcript_3/4_m.101579_len:2503	IPR002049	EGF-like, laminin
HINDICA_D_5491_Transcript_3/4_m.101579_len:2503	IPR013032	EGF-like, conserved site
HINDICA_D_5491_Transcript_3/4_m.101579_len:2503	IPR002049	EGF-like, laminin
HINDICA_D_5491_Transcript_3/4_m.101579_len:2503	IPR018031	Laminin B, subgroup
HINDICA_D_5491_Transcript_3/4_m.101579_len:2503	IPR002049	EGF-like, laminin
HINDICA_D_5491_Transcript_3/4_m.101579_len:2503	IPR013032	EGF-like, conserved site
HINDICA_D_5491_Transcript_3/4_m.101579_len:2503	IPR008211	Laminin, N-terminal
HINDICA_D_5491_Transcript_3/4_m.101579_len:2503	IPR002049	EGF-like, laminin
HINDICA_D_5491_Transcript_3/4_m.101579_len:2503	IPR000742	Epidermal growth factor-like domain
HINDICA_D_5491_Transcript_3/4_m.101579_len:2503	IPR002049	EGF-like, laminin
HINDICA_D_5491_Transcript_3/4_m.101579_len:2503	IPR013032	EGF-like, conserved site
HINDICA_D_5491_Transcript_3/4_m.101579_len:2503	IPR002049	EGF-like, laminin
HINDICA_D_5491_Transcript_3/4_m.101579_len:2503	IPR013032	EGF-like, conserved site
HINDICA_D_5491_Transcript_3/4_m.101579_len:2503	IPR002049	EGF-like, laminin
HINDICA_D_5491_Transcript_3/4_m.101579_len:2503	IPR008211	Laminin, N-terminal
HINDICA_D_5491_Transcript_3/4_m.101579_len:2503	IPR002049	EGF-like, laminin
HINDICA_D_5491_Transcript_3/4_m.101579_len:2503	IPR008211	Laminin, N-terminal
HINDICA_D_5491_Transcript_3/4_m.101579_len:2503	IPR002049	EGF-like, laminin
HINDICA_D_5491_Transcript_3/4_m.101579_len:2503	IPR013032	EGF-like, conserved site
HINDICA_D_5491_Transcript_3/4_m.101579_len:2503	IPR002049	EGF-like, laminin
HINDICA_D_5491_Transcript_3/4_m.101579_len:2503	IPR013032	EGF-like, conserved site
HINDICA_D_5491_Transcript_3/4_m.101579_len:2503	IPR002049	EGF-like, laminin
HINDICA_D_5491_Transcript_3/4_m.101579_len:2503	IPR013032	EGF-like, conserved site
HINDICA_D_5491_Transcript_3/4_m.101579_len:2503	IPR002049	EGF-like, laminin
HINDICA_D_5491_Transcript_3/4_m.101579_len:2503	IPR013032	EGF-like, conserved site
HINDICA_D_5491_Transcript_3/4_m.101579_len:2503	IPR002049	EGF-like, laminin
HINDICA_D_5491_Transcript_3/4_m.101579_len:2503	IPR013032	EGF-like, conserved site
HINDICA_D_5491_Transcript_3/4_m.101579_len:2503	IPR002049	EGF-like, laminin
HINDICA_D_6125_Transcript_1/3_m.111599_len:57	IPR000608	Ubiquitin-conjugating enzyme, E2
HINDICA_D_6125_Transcript_1/3_m.111599_len:57	IPR016135	Ubiquitin-conjugating enzyme/RWD-like
HINDICA_D_917_Transcript_1/1_m.35204_len:397	IPR001254	Peptidase S1
HINDICA_D_917_Transcript_1/1_m.35204_len:397	IPR009003	Trypsin-like cysteine/serine peptidase domain
HINDICA_D_917_Transcript_1/1_m.35204_len:397	IPR001254	Peptidase S1
HINDICA_D_917_Transcript_1/1_m.35204_len:397	IPR001314	Peptidase S1A, chymotrypsin-type
HINDICA_D_917_Transcript_1/1_m.35204_len:397	IPR001254	Peptidase S1
HINDICA_D_11661_Transcript_1/1_m.125444_len:773	IPR000020	Anaphylatoxin/fibulin
HINDICA_D_11661_Transcript_1/1_m.125444_len:773	IPR018097	EGF-like calcium-binding, conserved site
HINDICA_D_11661_Transcript_1/1_m.125444_len:773	IPR001881	EGF-like calcium-binding domain
HINDICA_D_11661_Transcript_1/1_m.125444_len:773	IPR018097	EGF-like calcium-binding, conserved site
HINDICA_D_11661_Transcript_1/1_m.125444_len:773	IPR000742	Epidermal growth factor-like domain
HINDICA_D_11661_Transcript_1/1_m.125444_len:773	IPR013032	EGF-like, conserved site
HINDICA_D_11661_Transcript_1/1_m.125444_len:773	IPR009030	Insulin-like growth factor binding protein, N-terminal
HINDICA_D_11661_Transcript_1/1_m.125444_len:773	IPR018097	EGF-like calcium-binding, conserved site
HINDICA_D_11661_Transcript_1/1_m.125444_len:773	IPR013032	EGF-like, conserved site
HINDICA_D_11661_Transcript_1/1_m.125444_len:773	IPR001881	EGF-like calcium-binding domain
HINDICA_D_11661_Transcript_1/1_m.125444_len:773	IPR018097	EGF-like calcium-binding, conserved site
HINDICA_D_11661_Transcript_1/1_m.125444_len:773	IPR000152	EGF-type aspartate/asparagine hydroxylation site
HINDICA_D_11661_Transcript_1/1_m.125444_len:773	IPR000742	Epidermal growth factor-like domain
HINDICA_D_11661_Transcript_1/1_m.125444_len:773	IPR018097	EGF-like calcium-binding, conserved site
HINDICA_D_11661_Transcript_1/1_m.125444_len:773	IPR009030	Insulin-like growth factor binding protein, N-terminal
HINDICA_D_11661_Transcript_1/1_m.125444_len:773	IPR013032	EGF-like, conserved site
HINDICA_D_11661_Transcript_1/1_m.125444_len:773	IPR000742	Epidermal growth factor-like domain
HINDICA_D_11661_Transcript_1/1_m.125444_len:773	IPR013032	EGF-like, conserved site
HINDICA_D_11661_Transcript_1/1_m.125444_len:773	IPR000152	EGF-type aspartate/asparagine hydroxylation site
HINDICA_D_11661_Transcript_1/1_m.125444_len:773	IPR009030	Insulin-like growth factor binding protein, N-terminal
HINDICA_D_11661_Transcript_1/1_m.125444_len:773	IPR000742	Epidermal growth factor-like domain
HINDICA_D_10198_Transcript_1/2_m.21494_len:671	IPR020683	Ankyrin repeat-containing domain
HINDICA_D_10198_Transcript_1/2_m.21494_len:671	IPR011011	Zinc finger, FYVE/PHD-type
HINDICA_D_10198_Transcript_1/2_m.21494_len:671	IPR000306	FYVE zinc finger
HINDICA_D_10198_Transcript_1/2_m.21494_len:671	IPR002110	Ankyrin repeat
HINDICA_D_10198_Transcript_1/2_m.21494_len:671	IPR020683	Ankyrin repeat-containing domain
HINDICA_D_10198_Transcript_1/2_m.21494_len:671	IPR002110	Ankyrin repeat
HINDICA_D_10198_Transcript_1/2_m.21494_len:671	IPR020683	Ankyrin repeat-containing domain
HINDICA_D_10198_Transcript_1/2_m.21494_len:671	IPR000306	FYVE zinc finger
HINDICA_D_10198_Transcript_1/2_m.21494_len:671	IPR020683	Ankyrin repeat-containing domain
HINDICA_D_10198_Transcript_1/2_m.21494_len:671	IPR013083	Zinc finger, RING/FYVE/PHD-type
HINDICA_D_10198_Transcript_1/2_m.21494_len:671	IPR020683	Ankyrin repeat-containing domain
HINDICA_D_10198_Transcript_1/2_m.21494_len:671	IPR002110	Ankyrin repeat
HINDICA_D_10198_Transcript_1/2_m.21494_len:671	IPR020683	Ankyrin repeat-containing domain
HINDICA_D_10198_Transcript_1/2_m.21494_len:671	IPR002110	Ankyrin repeat
HINDICA_D_10198_Transcript_1/2_m.21494_len:671	IPR020683	Ankyrin repeat-containing domain
HINDICA_D_10198_Transcript_1/2_m.21494_len:671	IPR017455	Zinc finger, FYVE-related
HINDICA_D_10198_Transcript_1/2_m.21494_len:671	IPR002110	Ankyrin repeat
HINDICA_D_10198_Transcript_1/2_m.21494_len:671	IPR020683	Ankyrin repeat-containing domain
HINDICA_D_11265_Transcript_1/1_m.58394_len:615	IPR003596	Immunoglobulin V-set, subgroup
HINDICA_D_11265_Transcript_1/1_m.58394_len:615	IPR003961	Fibronectin, type III
HINDICA_D_11265_Transcript_1/1_m.58394_len:615	IPR013783	Immunoglobulin-like fold
HINDICA_D_11265_Transcript_1/1_m.58394_len:615	IPR007110	Immunoglobulin-like domain
HINDICA_D_11265_Transcript_1/1_m.58394_len:615	IPR003599	Immunoglobulin subtype
HINDICA_D_11265_Transcript_1/1_m.58394_len:615	IPR013783	Immunoglobulin-like fold
HINDICA_D_11265_Transcript_1/1_m.58394_len:615	IPR007110	Immunoglobulin-like domain
HINDICA_D_11265_Transcript_1/1_m.58394_len:615	IPR003961	Fibronectin, type III
HINDICA_D_11265_Transcript_1/1_m.58394_len:615	IPR007110	Immunoglobulin-like domain
HINDICA_D_11265_Transcript_1/1_m.58394_len:615	IPR013783	Immunoglobulin-like fold
HINDICA_D_11265_Transcript_1/1_m.58394_len:615	IPR013098	Immunoglobulin I-set
HINDICA_D_11265_Transcript_1/1_m.58394_len:615	IPR003961	Fibronectin, type III
HINDICA_D_11265_Transcript_1/1_m.58394_len:615	IPR013783	Immunoglobulin-like fold
HINDICA_D_11265_Transcript_1/1_m.58394_len:615	IPR007110	Immunoglobulin-like domain
HINDICA_D_11265_Transcript_1/1_m.58394_len:615	IPR013783	Immunoglobulin-like fold
HINDICA_D_11265_Transcript_1/1_m.58394_len:615	IPR003598	Immunoglobulin subtype 2
HINDICA_D_5445_Transcript_2/2_m.155910_len:695	IPR018933	Netrin module, non-TIMP type
HINDICA_D_5445_Transcript_2/2_m.155910_len:695	IPR002049	EGF-like, laminin
HINDICA_D_5445_Transcript_2/2_m.155910_len:695	IPR008211	Laminin, N-terminal
HINDICA_D_5445_Transcript_2/2_m.155910_len:695	IPR002049	EGF-like, laminin
HINDICA_D_5445_Transcript_2/2_m.155910_len:695	IPR008211	Laminin, N-terminal
HINDICA_D_5445_Transcript_2/2_m.155910_len:695	IPR013032	EGF-like, conserved site
HINDICA_D_5445_Transcript_2/2_m.155910_len:695	IPR008211	Laminin, N-terminal
HINDICA_D_5445_Transcript_2/2_m.155910_len:695	IPR013032	EGF-like, conserved site
HINDICA_D_5445_Transcript_2/2_m.155910_len:695	IPR001134	Netrin domain
HINDICA_D_5445_Transcript_2/2_m.155910_len:695	IPR002049	EGF-like, laminin
HINDICA_D_5445_Transcript_2/2_m.155910_len:695	IPR018933	Netrin module, non-TIMP type
HINDICA_D_5445_Transcript_2/2_m.155910_len:695	IPR002049	EGF-like, laminin
HINDICA_D_5445_Transcript_2/2_m.155910_len:695	IPR008993	Tissue inhibitor of metalloproteinases-like, OB-fold
HINDICA_D_5445_Transcript_1/2_m.154735_len:695	IPR018933	Netrin module, non-TIMP type
HINDICA_D_5445_Transcript_1/2_m.154735_len:695	IPR002049	EGF-like, laminin
HINDICA_D_5445_Transcript_1/2_m.154735_len:695	IPR008211	Laminin, N-terminal
HINDICA_D_5445_Transcript_1/2_m.154735_len:695	IPR002049	EGF-like, laminin
HINDICA_D_5445_Transcript_1/2_m.154735_len:695	IPR008211	Laminin, N-terminal
HINDICA_D_5445_Transcript_1/2_m.154735_len:695	IPR013032	EGF-like, conserved site
HINDICA_D_5445_Transcript_1/2_m.154735_len:695	IPR008211	Laminin, N-terminal
HINDICA_D_5445_Transcript_1/2_m.154735_len:695	IPR013032	EGF-like, conserved site
HINDICA_D_5445_Transcript_1/2_m.154735_len:695	IPR001134	Netrin domain
HINDICA_D_5445_Transcript_1/2_m.154735_len:695	IPR002049	EGF-like, laminin
HINDICA_D_5445_Transcript_1/2_m.154735_len:695	IPR018933	Netrin module, non-TIMP type
HINDICA_D_5445_Transcript_1/2_m.154735_len:695	IPR002049	EGF-like, laminin
HINDICA_D_5445_Transcript_1/2_m.154735_len:695	IPR008993	Tissue inhibitor of metalloproteinases-like, OB-fold
HINDICA_D_11618_Transcript_1/2_m.89529_len:701	IPR017873	Cysteine-rich Golgi apparatus protein 1 repeat, eukaryote
HINDICA_D_11618_Transcript_1/2_m.89529_len:701	IPR001893	Cysteine-rich Golgi apparatus protein 1 repeat
HINDICA_D_11618_Transcript_1/2_m.89529_len:701	IPR017873	Cysteine-rich Golgi apparatus protein 1 repeat, eukaryote
HINDICA_D_11618_Transcript_2/2_m.57035_len:701	IPR017873	Cysteine-rich Golgi apparatus protein 1 repeat, eukaryote
HINDICA_D_11618_Transcript_2/2_m.57035_len:701	IPR001893	Cysteine-rich Golgi apparatus protein 1 repeat
HINDICA_D_11618_Transcript_2/2_m.57035_len:701	IPR017873	Cysteine-rich Golgi apparatus protein 1 repeat, eukaryote
HINDICA_D_17353_Transcript_1/1_m.53785_len:268	IPR002110	Ankyrin repeat
HINDICA_D_17353_Transcript_1/1_m.53785_len:268	IPR020683	Ankyrin repeat-containing domain
HINDICA_D_17353_Transcript_1/1_m.53785_len:268	IPR002110	Ankyrin repeat
HINDICA_D_17353_Transcript_1/1_m.53785_len:268	IPR020683	Ankyrin repeat-containing domain
HINDICA_D_17353_Transcript_1/1_m.53785_len:268	IPR002110	Ankyrin repeat
HINDICA_D_17353_Transcript_1/1_m.53785_len:268	IPR020683	Ankyrin repeat-containing domain
HINDICA_D_17353_Transcript_1/1_m.53785_len:268	IPR002110	Ankyrin repeat
HINDICA_D_4343_Transcript_1/1_m.95868_len:1504	IPR013032	EGF-like, conserved site
HINDICA_D_4343_Transcript_1/1_m.95868_len:1504	IPR002049	EGF-like, laminin
HINDICA_D_4343_Transcript_1/1_m.95868_len:1504	IPR000742	Epidermal growth factor-like domain
HINDICA_D_4343_Transcript_1/1_m.95868_len:1504	IPR000152	EGF-type aspartate/asparagine hydroxylation site
HINDICA_D_4343_Transcript_1/1_m.95868_len:1504	IPR000742	Epidermal growth factor-like domain
HINDICA_D_4343_Transcript_1/1_m.95868_len:1504	IPR013032	EGF-like, conserved site
HINDICA_D_4343_Transcript_1/1_m.95868_len:1504	IPR000742	Epidermal growth factor-like domain
HINDICA_D_4343_Transcript_1/1_m.95868_len:1504	IPR002049	EGF-like, laminin
HINDICA_D_4343_Transcript_1/1_m.95868_len:1504	IPR013032	EGF-like, conserved site
HINDICA_D_4343_Transcript_1/1_m.95868_len:1504	IPR000742	Epidermal growth factor-like domain
HINDICA_D_4343_Transcript_1/1_m.95868_len:1504	IPR013032	EGF-like, conserved site
HINDICA_D_4343_Transcript_1/1_m.95868_len:1504	IPR000742	Epidermal growth factor-like domain
HINDICA_D_4343_Transcript_1/1_m.95868_len:1504	IPR013032	EGF-like, conserved site
HINDICA_D_4343_Transcript_1/1_m.95868_len:1504	IPR000742	Epidermal growth factor-like domain
HINDICA_D_4343_Transcript_1/1_m.95868_len:1504	IPR013032	EGF-like, conserved site
HINDICA_D_4343_Transcript_1/1_m.95868_len:1504	IPR000742	Epidermal growth factor-like domain
HINDICA_D_4343_Transcript_1/1_m.95868_len:1504	IPR001881	EGF-like calcium-binding domain
HINDICA_D_4343_Transcript_1/1_m.95868_len:1504	IPR013032	EGF-like, conserved site
HINDICA_D_4343_Transcript_1/1_m.95868_len:1504	IPR018097	EGF-like calcium-binding, conserved site
HINDICA_D_4343_Transcript_1/1_m.95868_len:1504	IPR000152	EGF-type aspartate/asparagine hydroxylation site
HINDICA_D_4343_Transcript_1/1_m.95868_len:1504	IPR013032	EGF-like, conserved site
HINDICA_D_4343_Transcript_1/1_m.95868_len:1504	IPR000742	Epidermal growth factor-like domain
HINDICA_D_4343_Transcript_1/1_m.95868_len:1504	IPR026823	Complement Clr-like EGF domain
HINDICA_D_4343_Transcript_1/1_m.95868_len:1504	IPR013032	EGF-like, conserved site
HINDICA_D_4343_Transcript_1/1_m.95868_len:1504	IPR000152	EGF-type aspartate/asparagine hydroxylation site
HINDICA_D_4343_Transcript_1/1_m.95868_len:1504	IPR013032	EGF-like, conserved site
HINDICA_D_4343_Transcript_1/1_m.95868_len:1504	IPR011489	EMI domain
HINDICA_D_4343_Transcript_1/1_m.95868_len:1504	IPR000742	Epidermal growth factor-like domain
HINDICA_D_4343_Transcript_1/1_m.95868_len:1504	IPR013032	EGF-like, conserved site
HINDICA_D_4343_Transcript_1/1_m.95868_len:1504	IPR009030	Insulin-like growth factor binding protein, N-terminal
HINDICA_D_4343_Transcript_1/1_m.95868_len:1504	IPR000742	Epidermal growth factor-like domain
HINDICA_D_4343_Transcript_1/1_m.95868_len:1504	IPR013032	EGF-like, conserved site
HINDICA_D_4343_Transcript_1/1_m.95868_len:1504	IPR009030	Insulin-like growth factor binding protein, N-terminal
HINDICA_D_4343_Transcript_1/1_m.95868_len:1504	IPR013032	EGF-like, conserved site
HINDICA_D_4343_Transcript_1/1_m.95868_len:1504	IPR000742	Epidermal growth factor-like domain
HINDICA_D_4343_Transcript_1/1_m.95868_len:1504	IPR018097	EGF-like calcium-binding, conserved site
HINDICA_D_4343_Transcript_1/1_m.95868_len:1504	IPR013032	EGF-like, conserved site
HINDICA_D_4343_Transcript_1/1_m.95868_len:1504	IPR001881	EGF-like calcium-binding domain
HINDICA_D_4343_Transcript_1/1_m.95868_len:1504	IPR013032	EGF-like, conserved site
HINDICA_D_4343_Transcript_1/1_m.95868_len:1504	IPR000742	Epidermal growth factor-like domain
HINDICA_D_4343_Transcript_1/1_m.95868_len:1504	IPR013032	EGF-like, conserved site
HINDICA_D_4343_Transcript_1/1_m.95868_len:1504	IPR018097	EGF-like calcium-binding, conserved site
HINDICA_D_4343_Transcript_1/1_m.95868_len:1504	IPR000742	Epidermal growth factor-like domain
HINDICA_D_4343_Transcript_1/1_m.95868_len:1504	IPR013032	EGF-like, conserved site
HINDICA_D_4343_Transcript_1/1_m.95868_len:1504	IPR000742	Epidermal growth factor-like domain
HINDICA_D_4343_Transcript_1/1_m.95868_len:1504	IPR013032	EGF-like, conserved site
HINDICA_D_4343_Transcript_1/1_m.95868_len:1504	IPR000742	Epidermal growth factor-like domain
HINDICA_D_4343_Transcript_1/1_m.95868_len:1504	IPR013032	EGF-like, conserved site
HINDICA_D_9993_Transcript_2/3_m.173479_len:1090	IPR003961	Fibronectin, type III
HINDICA_D_9993_Transcript_2/3_m.173479_len:1090	IPR013783	Immunoglobulin-like fold
HINDICA_D_9993_Transcript_2/3_m.173479_len:1090	IPR003961	Fibronectin, type III
HINDICA_D_9993_Transcript_2/3_m.173479_len:1090	IPR013783	Immunoglobulin-like fold
HINDICA_D_9993_Transcript_2/3_m.173479_len:1090	IPR003961	Fibronectin, type III
HINDICA_D_261_Transcript_1/1_m.12400_len:519	IPR014766	Carboxypeptidase, regulatory domain
HINDICA_D_261_Transcript_1/1_m.12400_len:519	IPR000834	Peptidase M14, carboxypeptidase A
HINDICA_D_261_Transcript_1/1_m.12400_len:519	IPR008969	Carboxypeptidase-like, regulatory domain
HINDICA_D_5296_Transcript_1/1_m.94618_len:273	IPR013781	Glycoside hydrolase, catalytic domain
HINDICA_D_5296_Transcript_1/1_m.94618_len:273	IPR002053	Glycoside hydrolase, family 25
HINDICA_D_5296_Transcript_1/1_m.94618_len:273	IPR017853	Glycoside hydrolase, superfamily
HINDICA_D_5143_Transcript_1/2_m.166920_len:531	IPR018120	Glycoside hydrolase, family 1, active site
HINDICA_D_5143_Transcript_1/2_m.166920_len:531	IPR017853	Glycoside hydrolase, superfamily
HINDICA_D_5143_Transcript_1/2_m.166920_len:531	IPR018120	Glycoside hydrolase, family 1, active site
HINDICA_D_5143_Transcript_1/2_m.166920_len:531	IPR001360	Glycoside hydrolase, family 1
HINDICA_D_5143_Transcript_1/2_m.166920_len:531	IPR013781	Glycoside hydrolase, catalytic domain
HINDICA_D_5143_Transcript_2/2_m.141006_len:531	IPR018120	Glycoside hydrolase, family 1, active site
HINDICA_D_5143_Transcript_2/2_m.141006_len:531	IPR017853	Glycoside hydrolase, superfamily
HINDICA_D_5143_Transcript_2/2_m.141006_len:531	IPR018120	Glycoside hydrolase, family 1, active site
HINDICA_D_5143_Transcript_2/2_m.141006_len:531	IPR001360	Glycoside hydrolase, family 1
HINDICA_D_5143_Transcript_2/2_m.141006_len:531	IPR013781	Glycoside hydrolase, catalytic domain
HINDICA_D_13249_Transcript_2/2_m.125383_len:145	IPR002110	Ankyrin repeat
HINDICA_D_13249_Transcript_2/2_m.125383_len:145	IPR020683	Ankyrin repeat-containing domain
HINDICA_D_13249_Transcript_2/2_m.125383_len:145	IPR002110	Ankyrin repeat
HINDICA_D_13249_Transcript_2/2_m.125383_len:145	IPR020683	Ankyrin repeat-containing domain
HINDICA_D_6588_Transcript_1/1_m.130426_len:609	IPR020556	Amidase, conserved site
HINDICA_D_6588_Transcript_1/1_m.130426_len:609	IPR000120	Amidase
HINDICA_D_6588_Transcript_1/1_m.130426_len:609	IPR023631	Amidase signature domain
HINDICA_D_12509_Transcript_1/1_m.68860_len:605	IPR015883	Glycoside hydrolase family 20, catalytic core
HINDICA_D_12509_Transcript_1/1_m.68860_len:605	IPR025705	Beta-hexosaminidase subunit alpha/beta
HINDICA_D_12509_Transcript_1/1_m.68860_len:605	IPR013781	Glycoside hydrolase, catalytic domain
HINDICA_D_12509_Transcript_1/1_m.68860_len:605	IPR025705	Beta-hexosaminidase subunit alpha/beta
HINDICA_D_12509_Transcript_1/1_m.68860_len:605	IPR017853	Glycoside hydrolase, superfamily
HINDICA_D_8511_Transcript_1/1_m.98697_len:1572	IPR013783	Immunoglobulin-like fold
HINDICA_D_8511_Transcript_1/1_m.98697_len:1572	IPR003961	Fibronectin, type III
HINDICA_D_8511_Transcript_1/1_m.98697_len:1572	IPR013783	Immunoglobulin-like fold
HINDICA_D_8511_Transcript_1/1_m.98697_len:1572	IPR000387	Protein-tyrosine/Dual specificity phosphatase
HINDICA_D_8511_Transcript_1/1_m.98697_len:1572	IPR013783	Immunoglobulin-like fold
HINDICA_D_8511_Transcript_1/1_m.98697_len:1572	IPR003961	Fibronectin, type III
HINDICA_D_8511_Transcript_1/1_m.98697_len:1572	IPR013783	Immunoglobulin-like fold
HINDICA_D_8511_Transcript_1/1_m.98697_len:1572	IPR003961	Fibronectin, type III
HINDICA_D_8511_Transcript_1/1_m.98697_len:1572	IPR016130	Protein-tyrosine phosphatase, active site
HINDICA_D_8511_Transcript_1/1_m.98697_len:1572	IPR003961	Fibronectin, type III
HINDICA_D_8511_Transcript_1/1_m.98697_len:1572	IPR003595	Protein-tyrosine phosphatase, catalytic
HINDICA_D_8511_Transcript_1/1_m.98697_len:1572	IPR003961	Fibronectin, type III
HINDICA_D_8511_Transcript_1/1_m.98697_len:1572	IPR000242	Protein-tyrosine phosphatase, receptor/non-receptor type
HINDICA_D_8511_Transcript_1/1_m.98697_len:1572	IPR003961	Fibronectin, type III
HINDICA_D_8511_Transcript_1/1_m.98697_len:1572	IPR000387	Protein-tyrosine/Dual specificity phosphatase
HINDICA_D_8511_Transcript_1/1_m.98697_len:1572	IPR003961	Fibronectin, type III
HINDICA_D_8511_Transcript_1/1_m.98697_len:1572	IPR000242	Protein-tyrosine phosphatase, receptor/non-receptor type
HINDICA_D_8511_Transcript_1/1_m.98697_len:1572	IPR003961	Fibronectin, type III
HINDICA_D_8511_Transcript_1/1_m.98697_len:1572	IPR000242	Protein-tyrosine phosphatase, receptor/non-receptor type
HINDICA_D_8511_Transcript_1/1_m.98697_len:1572	IPR003961	Fibronectin, type III
HINDICA_D_8511_Transcript_1/1_m.98697_len:1572	IPR000242	Protein-tyrosine phosphatase, receptor/non-receptor type
HINDICA_D_8511_Transcript_1/1_m.98697_len:1572	IPR003961	Fibronectin, type III
HINDICA_D_8511_Transcript_1/1_m.98697_len:1572	IPR000242	Protein-tyrosine phosphatase, receptor/non-receptor type
HINDICA_D_3010_Transcript_1/2_m.48720_len:917	IPR026147	Rab3 GTPase-activating protein catalytic subunit
HINDICA_D_5096_Transcript_2/2_m.136465_len:220	IPR004296	Protein of unknown function DUF236
HINDICA_D_6580_Transcript_1/1_m.140483_len:633	IPR001117	Multicopper oxidase, type 1
HINDICA_D_6580_Transcript_1/1_m.140483_len:633	IPR008972	Cupredoxin
HINDICA_D_6580_Transcript_1/1_m.140483_len:633	IPR011707	Multicopper oxidase, type 3
HINDICA_D_6580_Transcript_1/1_m.140483_len:633	IPR008972	Cupredoxin
HINDICA_D_6580_Transcript_1/1_m.140483_len:633	IPR011706	Multicopper oxidase, type 2
HINDICA_D_6580_Transcript_1/1_m.140483_len:633	IPR008972	Cupredoxin
HINDICA_D_11867_Transcript_1/1_m.76162_len:173	IPR000120	Amidase
HINDICA_D_11867_Transcript_1/1_m.76162_len:173	IPR023631	Amidase signature domain
HINDICA_D_1660_Transcript_3/4_m.158547_len:462	IPR011510	Sterile alpha motif, type 2
HINDICA_D_1660_Transcript_3/4_m.158547_len:462	IPR001660	Sterile alpha motif domain
HINDICA_D_1660_Transcript_3/4_m.158547_len:462	IPR013761	Sterile alpha motif/pointed domain
HINDICA_D_1660_Transcript_3/4_m.158547_len:462	IPR001660	Sterile alpha motif domain
HINDICA_D_1660_Transcript_2/4_m.82393_len:462	IPR011510	Sterile alpha motif, type 2
HINDICA_D_1660_Transcript_2/4_m.82393_len:462	IPR001660	Sterile alpha motif domain
HINDICA_D_1660_Transcript_2/4_m.82393_len:462	IPR013761	Sterile alpha motif/pointed domain
HINDICA_D_1660_Transcript_2/4_m.82393_len:462	IPR001660	Sterile alpha motif domain
HINDICA_D_1660_Transcript_1/4_m.103465_len:462	IPR011510	Sterile alpha motif, type 2
HINDICA_D_1660_Transcript_1/4_m.103465_len:462	IPR001660	Sterile alpha motif domain
HINDICA_D_1660_Transcript_1/4_m.103465_len:462	IPR013761	Sterile alpha motif/pointed domain
HINDICA_D_1660_Transcript_1/4_m.103465_len:462	IPR001660	Sterile alpha motif domain
HINDICA_D_15072_Transcript_2/2_m.98406_len:230	IPR002048	EF-hand domain
HINDICA_D_15072_Transcript_2/2_m.98406_len:230	IPR011992	EF-hand domain pair
HINDICA_D_15072_Transcript_2/2_m.98406_len:230	IPR018247	EF-Hand 1, calcium-binding site
HINDICA_D_15072_Transcript_2/2_m.98406_len:230	IPR011992	EF-hand domain pair
HINDICA_D_15072_Transcript_2/2_m.98406_len:230	IPR002048	EF-hand domain
HINDICA_D_15072_Transcript_2/2_m.98406_len:230	IPR018247	EF-Hand 1, calcium-binding site
HINDICA_D_15072_Transcript_2/2_m.98406_len:230	IPR002048	EF-hand domain
HINDICA_D_15072_Transcript_2/2_m.98406_len:230	IPR018247	EF-Hand 1, calcium-binding site
HINDICA_D_7637_Transcript_1/4_m.129693_len:322	IPR003859	Beta-1,4-galactosyltransferase
HINDICA_D_7637_Transcript_1/4_m.129693_len:322	IPR027791	Galactosyltransferase, C-terminal domain
HINDICA_D_7637_Transcript_1/4_m.129693_len:322	IPR027995	Glycosyl transferase group 7, N-terminal
HINDICA_D_6446_Transcript_2/3_m.163523_len:313	IPR012345	STAT transcription factor, DNA-binding, subdomain
HINDICA_D_6446_Transcript_2/3_m.163523_len:313	IPR013800	STAT transcription factor, all-alpha
HINDICA_D_6446_Transcript_2/3_m.163523_len:313	IPR015988	STAT transcription factor, coiled coil
HINDICA_D_6446_Transcript_2/3_m.163523_len:313	IPR013800	STAT transcription factor, all-alpha
HINDICA_D_6446_Transcript_2/3_m.163523_len:313	IPR008967	p53-like transcription factor, DNA-binding
HINDICA_D_5023_Transcript_2/2_m.105605_len:2330	IPR018159	Spectrin/alpha-actinin
HINDICA_D_5023_Transcript_2/2_m.105605_len:2330	IPR001251	CRAL-TRIO domain
HINDICA_D_5023_Transcript_2/2_m.105605_len:2330	IPR011993	Pleckstrin homology-like domain
HINDICA_D_5023_Transcript_2/2_m.105605_len:2330	IPR000219	Dbl homology (DH) domain
HINDICA_D_5023_Transcript_2/2_m.105605_len:2330	IPR001251	CRAL-TRIO domain
HINDICA_D_5023_Transcript_2/2_m.105605_len:2330	IPR001849	Pleckstrin homology domain
HINDICA_D_5023_Transcript_2/2_m.105605_len:2330	IPR000219	Dbl homology (DH) domain
HINDICA_D_5023_Transcript_2/2_m.105605_len:2330	IPR001849	Pleckstrin homology domain
HINDICA_D_5023_Transcript_2/2_m.105605_len:2330	IPR001331	Guanine-nucleotide dissociation stimulator, CDC24, conserved site
HINDICA_D_5023_Transcript_2/2_m.105605_len:2330	IPR011993	Pleckstrin homology-like domain
HINDICA_D_5023_Transcript_2/2_m.105605_len:2330	IPR001251	CRAL-TRIO domain
HINDICA_D_5023_Transcript_2/2_m.105605_len:2330	IPR000219	Dbl homology (DH) domain
HINDICA_D_5023_Transcript_2/2_m.105605_len:2330	IPR001849	Pleckstrin homology domain
HINDICA_D_5023_Transcript_2/2_m.105605_len:2330	IPR000219	Dbl homology (DH) domain
HINDICA_D_5023_Transcript_2/2_m.105605_len:2330	IPR001251	CRAL-TRIO domain
HINDICA_D_5023_Transcript_2/2_m.105605_len:2330	IPR000219	Dbl homology (DH) domain
HINDICA_D_5023_Transcript_1/2_m.102195_len:2330	IPR018159	Spectrin/alpha-actinin
HINDICA_D_5023_Transcript_1/2_m.102195_len:2330	IPR001251	CRAL-TRIO domain
HINDICA_D_5023_Transcript_1/2_m.102195_len:2330	IPR011993	Pleckstrin homology-like domain
HINDICA_D_5023_Transcript_1/2_m.102195_len:2330	IPR000219	Dbl homology (DH) domain
HINDICA_D_5023_Transcript_1/2_m.102195_len:2330	IPR001251	CRAL-TRIO domain
HINDICA_D_5023_Transcript_1/2_m.102195_len:2330	IPR001849	Pleckstrin homology domain
HINDICA_D_5023_Transcript_1/2_m.102195_len:2330	IPR000219	Dbl homology (DH) domain
HINDICA_D_5023_Transcript_1/2_m.102195_len:2330	IPR001849	Pleckstrin homology domain
HINDICA_D_5023_Transcript_1/2_m.102195_len:2330	IPR001331	Guanine-nucleotide dissociation stimulator, CDC24, conserved site
HINDICA_D_5023_Transcript_1/2_m.102195_len:2330	IPR011993	Pleckstrin homology-like domain
HINDICA_D_5023_Transcript_1/2_m.102195_len:2330	IPR001251	CRAL-TRIO domain
HINDICA_D_5023_Transcript_1/2_m.102195_len:2330	IPR000219	Dbl homology (DH) domain
HINDICA_D_5023_Transcript_1/2_m.102195_len:2330	IPR001849	Pleckstrin homology domain
HINDICA_D_5023_Transcript_1/2_m.102195_len:2330	IPR000219	Dbl homology (DH) domain
HINDICA_D_5023_Transcript_1/2_m.102195_len:2330	IPR001251	CRAL-TRIO domain
HINDICA_D_5023_Transcript_1/2_m.102195_len:2330	IPR000219	Dbl homology (DH) domain
HINDICA_D_2415_Transcript_1/1_m.70820_len:628	IPR000640	Translation elongation factor EFG, V domain
HINDICA_D_2415_Transcript_1/1_m.70820_len:628	IPR009000	Translation elongation/initiation factor/Ribosomal, beta-barrel
HINDICA_D_2415_Transcript_1/1_m.70820_len:628	IPR005225	Small GTP-binding protein domain
HINDICA_D_2415_Transcript_1/1_m.70820_len:628	IPR027417	P-loop containing nucleoside triphosphate hydrolase
HINDICA_D_2415_Transcript_1/1_m.70820_len:628	IPR000795	Elongation factor, GTP-binding domain
HINDICA_D_2415_Transcript_1/1_m.70820_len:628	IPR004161	Translation elongation factor EFTu/EF1A, domain 2
HINDICA_D_2415_Transcript_1/1_m.70820_len:628	IPR006297	Elongation factor 4
HINDICA_D_2415_Transcript_1/1_m.70820_len:628	IPR000795	Elongation factor, GTP-binding domain
HINDICA_D_2415_Transcript_1/1_m.70820_len:628	IPR009022	Elongation factor G, III-V domain
HINDICA_D_2415_Transcript_1/1_m.70820_len:628	IPR006297	Elongation factor 4
HINDICA_D_2415_Transcript_1/1_m.70820_len:628	IPR013842	GTP-binding protein LepA, C-terminal
HINDICA_D_2415_Transcript_1/1_m.70820_len:628	IPR000640	Translation elongation factor EFG, V domain
HINDICA_D_3903_Transcript_1/2_m.75401_len:256	IPR006073	GTP binding domain
HINDICA_D_3903_Transcript_1/2_m.75401_len:256	IPR027417	P-loop containing nucleoside triphosphate hydrolase
HINDICA_D_10279_Transcript_1/1_m.35905_len:153	IPR019537	Transmembrane protein 65
HINDICA_D_3010_Transcript_2/2_m.167108_len:896	IPR026147	Rab3 GTPase-activating protein catalytic subunit
HINDICA_D_488_Transcript_2/2_m.8774_len:663	IPR000209	Peptidase S8/S53 domain
HINDICA_D_488_Transcript_2/2_m.8774_len:663	IPR008979	Galactose-binding domain-like
HINDICA_D_488_Transcript_2/2_m.8774_len:663	IPR000209	Peptidase S8/S53 domain
HINDICA_D_488_Transcript_2/2_m.8774_len:663	IPR002884	Proprotein convertase, P
HINDICA_D_488_Transcript_2/2_m.8774_len:663	IPR015500	Peptidase S8, subtilisin-related
HINDICA_D_488_Transcript_2/2_m.8774_len:663	IPR022398	Peptidase S8, subtilisin, His-active site
HINDICA_D_488_Transcript_2/2_m.8774_len:663	IPR008979	Galactose-binding domain-like
HINDICA_D_488_Transcript_2/2_m.8774_len:663	IPR000209	Peptidase S8/S53 domain
HINDICA_D_488_Transcript_2/2_m.8774_len:663	IPR023828	Peptidase S8, subtilisin, Ser-active site
HINDICA_D_488_Transcript_2/2_m.8774_len:663	IPR023827	Peptidase S8, subtilisin, Asp-active site
HINDICA_D_2455_Transcript_1/1_m.130289_len:739	IPR004709	Na+/H+ exchanger
HINDICA_D_2455_Transcript_1/1_m.130289_len:739	IPR006153	Cation/H+ exchanger
HINDICA_D_2455_Transcript_1/1_m.130289_len:739	IPR004709	Na+/H+ exchanger
HINDICA_D_1950_Transcript_2/2_m.159937_len:457	IPR006620	Prolyl 4-hydroxylase, alpha subunit
HINDICA_D_1950_Transcript_2/2_m.159937_len:457	IPR011990	Tetratricopeptide-like helical
HINDICA_D_1950_Transcript_2/2_m.159937_len:457	IPR013547	Prolyl 4-hydroxylase alpha-subunit, N-terminal
HINDICA_D_1950_Transcript_2/2_m.159937_len:457	IPR013026	Tetratricopeptide repeat-containing domain
HINDICA_D_3014_Transcript_1/1_m.25900_len:1488	IPR002049	EGF-like, laminin
HINDICA_D_3014_Transcript_1/1_m.25900_len:1488	IPR008211	Laminin, N-terminal
HINDICA_D_3014_Transcript_1/1_m.25900_len:1488	IPR002049	EGF-like, laminin
HINDICA_D_3014_Transcript_1/1_m.25900_len:1488	IPR008211	Laminin, N-terminal
HINDICA_D_3014_Transcript_1/1_m.25900_len:1488	IPR002049	EGF-like, laminin
HINDICA_D_3014_Transcript_1/1_m.25900_len:1488	IPR000034	Laminin B type IV
HINDICA_D_3014_Transcript_1/1_m.25900_len:1488	IPR002049	EGF-like, laminin
HINDICA_D_3014_Transcript_1/1_m.25900_len:1488	IPR018031	Laminin B, subgroup
HINDICA_D_3014_Transcript_1/1_m.25900_len:1488	IPR002049	EGF-like, laminin
HINDICA_D_3014_Transcript_1/1_m.25900_len:1488	IPR000034	Laminin B type IV
HINDICA_D_3014_Transcript_1/1_m.25900_len:1488	IPR002049	EGF-like, laminin
HINDICA_D_3014_Transcript_1/1_m.25900_len:1488	IPR000742	Epidermal growth factor-like domain
HINDICA_D_3014_Transcript_1/1_m.25900_len:1488	IPR002049	EGF-like, laminin
HINDICA_D_3014_Transcript_1/1_m.25900_len:1488	IPR008211	Laminin, N-terminal
HINDICA_D_3014_Transcript_1/1_m.25900_len:1488	IPR002049	EGF-like, laminin
HINDICA_D_4621_Transcript_3/3_m.153019_len:1253	IPR010513	KEN domain
HINDICA_D_4621_Transcript_3/3_m.153019_len:1253	IPR008271	Serine/threonine-protein kinase, active site
HINDICA_D_4621_Transcript_3/3_m.153019_len:1253	IPR002290	Serine/threonine- / dual specificity protein kinase, catalytic domain
HINDICA_D_4621_Transcript_3/3_m.153019_len:1253	IPR006567	PUG domain
HINDICA_D_4621_Transcript_3/3_m.153019_len:1253	IPR018391	Pyrrolo-quinoline quinone beta-propeller repeat
HINDICA_D_4621_Transcript_3/3_m.153019_len:1253	IPR010513	KEN domain
HINDICA_D_4621_Transcript_3/3_m.153019_len:1253	IPR011009	Protein kinase-like domain
HINDICA_D_4621_Transcript_3/3_m.153019_len:1253	IPR000719	Protein kinase domain
HINDICA_D_4621_Transcript_3/3_m.153019_len:1253	IPR027295	Quinonprotein alcohol dehydrogenase-like domain
HINDICA_D_4621_Transcript_3/3_m.153019_len:1253	IPR000719	Protein kinase domain
HINDICA_D_4621_Transcript_3/3_m.153019_len:1253	IPR011047	Quinonprotein alcohol dehydrogenase-like superfamily
HINDICA_D_14670_Transcript_1/1_m.17489_len:251	IPR012336	Thioredoxin-like fold
HINDICA_D_14670_Transcript_1/1_m.17489_len:251	IPR013766	Thioredoxin domain
HINDICA_D_14670_Transcript_1/1_m.17489_len:251	IPR012336	Thioredoxin-like fold
HINDICA_D_14670_Transcript_1/1_m.17489_len:251	IPR017937	Thioredoxin, conserved site
HINDICA_D_14670_Transcript_1/1_m.17489_len:251	IPR005746	Thioredoxin
HINDICA_D_14670_Transcript_1/1_m.17489_len:251	IPR012336	Thioredoxin-like fold
HINDICA_D_14670_Transcript_1/1_m.17489_len:251	IPR005788	Disulphide isomerase
HINDICA_D_14670_Transcript_1/1_m.17489_len:251	IPR017937	Thioredoxin, conserved site
HINDICA_D_6314_Transcript_3/3_m.164324_len:795	IPR008197	Whey acidic protein-type 4-disulphide core
HINDICA_D_6314_Transcript_3/3_m.164324_len:795	IPR003961	Fibronectin, type III
HINDICA_D_6314_Transcript_3/3_m.164324_len:795	IPR013783	Immunoglobulin-like fold
HINDICA_D_6314_Transcript_3/3_m.164324_len:795	IPR003961	Fibronectin, type III
HINDICA_D_6314_Transcript_3/3_m.164324_len:795	IPR013783	Immunoglobulin-like fold
HINDICA_D_6314_Transcript_3/3_m.164324_len:795	IPR008197	Whey acidic protein-type 4-disulphide core
HINDICA_D_6314_Transcript_3/3_m.164324_len:795	IPR013783	Immunoglobulin-like fold
HINDICA_D_6314_Transcript_3/3_m.164324_len:795	IPR008197	Whey acidic protein-type 4-disulphide core
HINDICA_D_6314_Transcript_3/3_m.164324_len:795	IPR003961	Fibronectin, type III
HINDICA_D_49_Transcript_1/6_m.174017_len:733	IPR011991	Winged helix-turn-helix DNA-binding domain
HINDICA_D_49_Transcript_1/6_m.174017_len:733	IPR001373	Cullin, N-terminal
HINDICA_D_49_Transcript_1/6_m.174017_len:733	IPR016159	Cullin repeat-like-containing domain
HINDICA_D_49_Transcript_1/6_m.174017_len:733	IPR016158	Cullin homology
HINDICA_D_49_Transcript_1/6_m.174017_len:733	IPR011991	Winged helix-turn-helix DNA-binding domain
HINDICA_D_49_Transcript_1/6_m.174017_len:733	IPR019559	Cullin protein, neddylation domain
HINDICA_D_49_Transcript_1/6_m.174017_len:733	IPR016158	Cullin homology
HINDICA_D_2427_Transcript_4/6_m.115323_len:2239	IPR018497	Peptidase M13, C-terminal domain
HINDICA_D_2427_Transcript_4/6_m.115323_len:2239	IPR024079	Metallopeptidase, catalytic domain
HINDICA_D_2427_Transcript_4/6_m.115323_len:2239	IPR008753	Peptidase M13, N-terminal domain
HINDICA_D_1362_Transcript_1/1_m.68469_len:409	IPR000742	Epidermal growth factor-like domain
HINDICA_D_16861_Transcript_1/1_m.32870_len:592	IPR011009	Protein kinase-like domain
HINDICA_D_16861_Transcript_1/1_m.32870_len:592	IPR000472	TGF-beta receptor/activin receptor, type I/II
HINDICA_D_16861_Transcript_1/1_m.32870_len:592	IPR017441	Protein kinase, ATP binding site
HINDICA_D_16861_Transcript_1/1_m.32870_len:592	IPR000719	Protein kinase domain
HINDICA_D_16861_Transcript_1/1_m.32870_len:592	IPR002290	Serine/threonine- / dual specificity protein kinase, catalytic domain
HINDICA_D_16861_Transcript_1/1_m.32870_len:592	IPR008271	Serine/threonine-protein kinase, active site
HINDICA_D_16861_Transcript_1/1_m.32870_len:592	IPR000719	Protein kinase domain
HINDICA_D_16189_Transcript_1/2_m.171161_len:183	IPR003172	MD-2-related lipid-recognition domain
HINDICA_D_16189_Transcript_1/2_m.171161_len:183	IPR014756	Immunoglobulin E-set
HINDICA_D_15857_Transcript_1/1_m.122601_len:534	IPR002223	Proteinase inhibitor I2, Kunitz metazoa
HINDICA_D_15857_Transcript_1/1_m.122601_len:534	IPR013032	EGF-like, conserved site
HINDICA_D_15857_Transcript_1/1_m.122601_len:534	IPR000742	Epidermal growth factor-like domain
HINDICA_D_15857_Transcript_1/1_m.122601_len:534	IPR002223	Proteinase inhibitor I2, Kunitz metazoa
HINDICA_D_15857_Transcript_1/1_m.122601_len:534	IPR013032	EGF-like, conserved site
HINDICA_D_15857_Transcript_1/1_m.122601_len:534	IPR002223	Proteinase inhibitor I2, Kunitz metazoa
HINDICA_D_15857_Transcript_1/1_m.122601_len:534	IPR000742	Epidermal growth factor-like domain
HINDICA_D_15857_Transcript_1/1_m.122601_len:534	IPR002223	Proteinase inhibitor I2, Kunitz metazoa
HINDICA_D_15857_Transcript_1/1_m.122601_len:534	IPR000742	Epidermal growth factor-like domain
HINDICA_D_15857_Transcript_1/1_m.122601_len:534	IPR013032	EGF-like, conserved site
HINDICA_D_15857_Transcript_1/1_m.122601_len:534	IPR000742	Epidermal growth factor-like domain
HINDICA_D_15857_Transcript_1/1_m.122601_len:534	IPR002223	Proteinase inhibitor I2, Kunitz metazoa
HINDICA_D_15857_Transcript_1/1_m.122601_len:534	IPR001881	EGF-like calcium-binding domain
HINDICA_D_158_Transcript_1/1_m.78783_len:4292	IPR023415	Low-density lipoprotein (LDL) receptor class A, conserved site
HINDICA_D_158_Transcript_1/1_m.78783_len:4292	IPR002172	Low-density lipoprotein (LDL) receptor class A repeat
HINDICA_D_158_Transcript_1/1_m.78783_len:4292	IPR000033	LDLR class B repeat
HINDICA_D_158_Transcript_1/1_m.78783_len:4292	IPR000742	Epidermal growth factor-like domain
HINDICA_D_158_Transcript_1/1_m.78783_len:4292	IPR023415	Low-density lipoprotein (LDL) receptor class A, conserved site
HINDICA_D_158_Transcript_1/1_m.78783_len:4292	IPR002172	Low-density lipoprotein (LDL) receptor class A repeat
HINDICA_D_158_Transcript_1/1_m.78783_len:4292	IPR000033	LDLR class B repeat
HINDICA_D_158_Transcript_1/1_m.78783_len:4292	IPR002172	Low-density lipoprotein (LDL) receptor class A repeat
HINDICA_D_158_Transcript_1/1_m.78783_len:4292	IPR001881	EGF-like calcium-binding domain
HINDICA_D_158_Transcript_1/1_m.78783_len:4292	IPR002172	Low-density lipoprotein (LDL) receptor class A repeat
HINDICA_D_158_Transcript_1/1_m.78783_len:4292	IPR000033	LDLR class B repeat
HINDICA_D_158_Transcript_1/1_m.78783_len:4292	IPR002172	Low-density lipoprotein (LDL) receptor class A repeat
HINDICA_D_158_Transcript_1/1_m.78783_len:4292	IPR000152	EGF-type aspartate/asparagine hydroxylation site
HINDICA_D_158_Transcript_1/1_m.78783_len:4292	IPR023415	Low-density lipoprotein (LDL) receptor class A, conserved site
HINDICA_D_158_Transcript_1/1_m.78783_len:4292	IPR002172	Low-density lipoprotein (LDL) receptor class A repeat
HINDICA_D_158_Transcript_1/1_m.78783_len:4292	IPR000033	LDLR class B repeat
HINDICA_D_158_Transcript_1/1_m.78783_len:4292	IPR023415	Low-density lipoprotein (LDL) receptor class A, conserved site
HINDICA_D_158_Transcript_1/1_m.78783_len:4292	IPR002172	Low-density lipoprotein (LDL) receptor class A repeat
HINDICA_D_158_Transcript_1/1_m.78783_len:4292	IPR000033	LDLR class B repeat
HINDICA_D_158_Transcript_1/1_m.78783_len:4292	IPR009030	Insulin-like growth factor binding protein, N-terminal
HINDICA_D_158_Transcript_1/1_m.78783_len:4292	IPR002172	Low-density lipoprotein (LDL) receptor class A repeat
HINDICA_D_158_Transcript_1/1_m.78783_len:4292	IPR000152	EGF-type aspartate/asparagine hydroxylation site
HINDICA_D_158_Transcript_1/1_m.78783_len:4292	IPR002172	Low-density lipoprotein (LDL) receptor class A repeat
HINDICA_D_158_Transcript_1/1_m.78783_len:4292	IPR000033	LDLR class B repeat
HINDICA_D_158_Transcript_1/1_m.78783_len:4292	IPR023415	Low-density lipoprotein (LDL) receptor class A, conserved site
HINDICA_D_158_Transcript_1/1_m.78783_len:4292	IPR002172	Low-density lipoprotein (LDL) receptor class A repeat
HINDICA_D_158_Transcript_1/1_m.78783_len:4292	IPR023415	Low-density lipoprotein (LDL) receptor class A, conserved site
HINDICA_D_158_Transcript_1/1_m.78783_len:4292	IPR011042	Six-bladed beta-propeller, TolB-like
HINDICA_D_158_Transcript_1/1_m.78783_len:4292	IPR002172	Low-density lipoprotein (LDL) receptor class A repeat
HINDICA_D_158_Transcript_1/1_m.78783_len:4292	IPR000152	EGF-type aspartate/asparagine hydroxylation site
HINDICA_D_158_Transcript_1/1_m.78783_len:4292	IPR023415	Low-density lipoprotein (LDL) receptor class A, conserved site
HINDICA_D_158_Transcript_1/1_m.78783_len:4292	IPR002172	Low-density lipoprotein (LDL) receptor class A repeat
HINDICA_D_158_Transcript_1/1_m.78783_len:4292	IPR013032	EGF-like, conserved site
HINDICA_D_158_Transcript_1/1_m.78783_len:4292	IPR000033	LDLR class B repeat
HINDICA_D_158_Transcript_1/1_m.78783_len:4292	IPR002172	Low-density lipoprotein (LDL) receptor class A repeat
HINDICA_D_158_Transcript_1/1_m.78783_len:4292	IPR000033	LDLR class B repeat
HINDICA_D_158_Transcript_1/1_m.78783_len:4292	IPR002172	Low-density lipoprotein (LDL) receptor class A repeat
HINDICA_D_158_Transcript_1/1_m.78783_len:4292	IPR023415	Low-density lipoprotein (LDL) receptor class A, conserved site
HINDICA_D_158_Transcript_1/1_m.78783_len:4292	IPR002172	Low-density lipoprotein (LDL) receptor class A repeat
HINDICA_D_158_Transcript_1/1_m.78783_len:4292	IPR000033	LDLR class B repeat
HINDICA_D_158_Transcript_1/1_m.78783_len:4292	IPR002172	Low-density lipoprotein (LDL) receptor class A repeat
HINDICA_D_158_Transcript_1/1_m.78783_len:4292	IPR023415	Low-density lipoprotein (LDL) receptor class A, conserved site
HINDICA_D_158_Transcript_1/1_m.78783_len:4292	IPR002172	Low-density lipoprotein (LDL) receptor class A repeat
HINDICA_D_158_Transcript_1/1_m.78783_len:4292	IPR000033	LDLR class B repeat
HINDICA_D_158_Transcript_1/1_m.78783_len:4292	IPR023415	Low-density lipoprotein (LDL) receptor class A, conserved site
HINDICA_D_158_Transcript_1/1_m.78783_len:4292	IPR000033	LDLR class B repeat
HINDICA_D_158_Transcript_1/1_m.78783_len:4292	IPR002172	Low-density lipoprotein (LDL) receptor class A repeat
HINDICA_D_158_Transcript_1/1_m.78783_len:4292	IPR023415	Low-density lipoprotein (LDL) receptor class A, conserved site
HINDICA_D_158_Transcript_1/1_m.78783_len:4292	IPR002172	Low-density lipoprotein (LDL) receptor class A repeat
HINDICA_D_158_Transcript_1/1_m.78783_len:4292	IPR023415	Low-density lipoprotein (LDL) receptor class A, conserved site
HINDICA_D_158_Transcript_1/1_m.78783_len:4292	IPR002172	Low-density lipoprotein (LDL) receptor class A repeat
HINDICA_D_158_Transcript_1/1_m.78783_len:4292	IPR000033	LDLR class B repeat
HINDICA_D_158_Transcript_1/1_m.78783_len:4292	IPR002172	Low-density lipoprotein (LDL) receptor class A repeat
HINDICA_D_158_Transcript_1/1_m.78783_len:4292	IPR000033	LDLR class B repeat
HINDICA_D_158_Transcript_1/1_m.78783_len:4292	IPR002172	Low-density lipoprotein (LDL) receptor class A repeat
HINDICA_D_158_Transcript_1/1_m.78783_len:4292	IPR000033	LDLR class B repeat
HINDICA_D_158_Transcript_1/1_m.78783_len:4292	IPR002172	Low-density lipoprotein (LDL) receptor class A repeat
HINDICA_D_158_Transcript_1/1_m.78783_len:4292	IPR000033	LDLR class B repeat
HINDICA_D_158_Transcript_1/1_m.78783_len:4292	IPR002172	Low-density lipoprotein (LDL) receptor class A repeat
HINDICA_D_158_Transcript_1/1_m.78783_len:4292	IPR023415	Low-density lipoprotein (LDL) receptor class A, conserved site
HINDICA_D_158_Transcript_1/1_m.78783_len:4292	IPR002172	Low-density lipoprotein (LDL) receptor class A repeat
HINDICA_D_158_Transcript_1/1_m.78783_len:4292	IPR000033	LDLR class B repeat
HINDICA_D_158_Transcript_1/1_m.78783_len:4292	IPR023415	Low-density lipoprotein (LDL) receptor class A, conserved site
HINDICA_D_158_Transcript_1/1_m.78783_len:4292	IPR002172	Low-density lipoprotein (LDL) receptor class A repeat
HINDICA_D_158_Transcript_1/1_m.78783_len:4292	IPR000033	LDLR class B repeat
HINDICA_D_158_Transcript_1/1_m.78783_len:4292	IPR018097	EGF-like calcium-binding, conserved site
HINDICA_D_158_Transcript_1/1_m.78783_len:4292	IPR000152	EGF-type aspartate/asparagine hydroxylation site
HINDICA_D_158_Transcript_1/1_m.78783_len:4292	IPR000033	LDLR class B repeat
HINDICA_D_158_Transcript_1/1_m.78783_len:4292	IPR002172	Low-density lipoprotein (LDL) receptor class A repeat
HINDICA_D_158_Transcript_1/1_m.78783_len:4292	IPR023415	Low-density lipoprotein (LDL) receptor class A, conserved site
HINDICA_D_158_Transcript_1/1_m.78783_len:4292	IPR002172	Low-density lipoprotein (LDL) receptor class A repeat
HINDICA_D_158_Transcript_1/1_m.78783_len:4292	IPR023415	Low-density lipoprotein (LDL) receptor class A, conserved site
HINDICA_D_158_Transcript_1/1_m.78783_len:4292	IPR018097	EGF-like calcium-binding, conserved site
HINDICA_D_158_Transcript_1/1_m.78783_len:4292	IPR000033	LDLR class B repeat
HINDICA_D_158_Transcript_1/1_m.78783_len:4292	IPR000152	EGF-type aspartate/asparagine hydroxylation site
HINDICA_D_158_Transcript_1/1_m.78783_len:4292	IPR002172	Low-density lipoprotein (LDL) receptor class A repeat
HINDICA_D_158_Transcript_1/1_m.78783_len:4292	IPR000033	LDLR class B repeat
HINDICA_D_158_Transcript_1/1_m.78783_len:4292	IPR002172	Low-density lipoprotein (LDL) receptor class A repeat
HINDICA_D_158_Transcript_1/1_m.78783_len:4292	IPR023415	Low-density lipoprotein (LDL) receptor class A, conserved site
HINDICA_D_158_Transcript_1/1_m.78783_len:4292	IPR000152	EGF-type aspartate/asparagine hydroxylation site
HINDICA_D_158_Transcript_1/1_m.78783_len:4292	IPR002172	Low-density lipoprotein (LDL) receptor class A repeat
HINDICA_D_158_Transcript_1/1_m.78783_len:4292	IPR023415	Low-density lipoprotein (LDL) receptor class A, conserved site
HINDICA_D_158_Transcript_1/1_m.78783_len:4292	IPR002172	Low-density lipoprotein (LDL) receptor class A repeat
HINDICA_D_158_Transcript_1/1_m.78783_len:4292	IPR023415	Low-density lipoprotein (LDL) receptor class A, conserved site
HINDICA_D_158_Transcript_1/1_m.78783_len:4292	IPR013032	EGF-like, conserved site
HINDICA_D_158_Transcript_1/1_m.78783_len:4292	IPR002172	Low-density lipoprotein (LDL) receptor class A repeat
HINDICA_D_158_Transcript_1/1_m.78783_len:4292	IPR001881	EGF-like calcium-binding domain
HINDICA_D_158_Transcript_1/1_m.78783_len:4292	IPR002172	Low-density lipoprotein (LDL) receptor class A repeat
HINDICA_D_158_Transcript_1/1_m.78783_len:4292	IPR023415	Low-density lipoprotein (LDL) receptor class A, conserved site
HINDICA_D_158_Transcript_1/1_m.78783_len:4292	IPR002172	Low-density lipoprotein (LDL) receptor class A repeat
HINDICA_D_158_Transcript_1/1_m.78783_len:4292	IPR023415	Low-density lipoprotein (LDL) receptor class A, conserved site
HINDICA_D_158_Transcript_1/1_m.78783_len:4292	IPR002172	Low-density lipoprotein (LDL) receptor class A repeat
HINDICA_D_158_Transcript_1/1_m.78783_len:4292	IPR023415	Low-density lipoprotein (LDL) receptor class A, conserved site
HINDICA_D_158_Transcript_1/1_m.78783_len:4292	IPR002172	Low-density lipoprotein (LDL) receptor class A repeat
HINDICA_D_158_Transcript_1/1_m.78783_len:4292	IPR023415	Low-density lipoprotein (LDL) receptor class A, conserved site
HINDICA_D_158_Transcript_1/1_m.78783_len:4292	IPR002172	Low-density lipoprotein (LDL) receptor class A repeat
HINDICA_D_158_Transcript_1/1_m.78783_len:4292	IPR018097	EGF-like calcium-binding, conserved site
HINDICA_D_158_Transcript_1/1_m.78783_len:4292	IPR000033	LDLR class B repeat
HINDICA_D_158_Transcript_1/1_m.78783_len:4292	IPR002172	Low-density lipoprotein (LDL) receptor class A repeat
HINDICA_D_158_Transcript_1/1_m.78783_len:4292	IPR023415	Low-density lipoprotein (LDL) receptor class A, conserved site
HINDICA_D_158_Transcript_1/1_m.78783_len:4292	IPR002172	Low-density lipoprotein (LDL) receptor class A repeat
HINDICA_D_158_Transcript_1/1_m.78783_len:4292	IPR023415	Low-density lipoprotein (LDL) receptor class A, conserved site
HINDICA_D_2633_Transcript_1/1_m.126790_len:473	IPR006026	Peptidase, metallopeptidase
HINDICA_D_2633_Transcript_1/1_m.126790_len:473	IPR001818	Peptidase M10, metallopeptidase
HINDICA_D_2633_Transcript_1/1_m.126790_len:473	IPR002477	Peptidoglycan binding-like
HINDICA_D_2633_Transcript_1/1_m.126790_len:473	IPR021190	Peptidase M10A
HINDICA_D_2633_Transcript_1/1_m.126790_len:473	IPR024079	Metallopeptidase, catalytic domain
HINDICA_D_2633_Transcript_1/1_m.126790_len:473	IPR002477	Peptidoglycan binding-like
HINDICA_D_6774_Transcript_3/3_m.127877_len:184	IPR017580	2-oxo-4-hydroxy-4-carboxy-5-ureidoimidazoline decarboxylase, type 1
HINDICA_D_6774_Transcript_3/3_m.127877_len:184	IPR018020	Oxo-4-hydroxy-4-carboxy-5-ureidoimidazoline decarboxylase
HINDICA_D_10006_Transcript_1/1_m.128378_len:483	IPR000276	G protein-coupled receptor, rhodopsin-like
HINDICA_D_10006_Transcript_1/1_m.128378_len:483	IPR017452	GPCR, rhodopsin-like, 7TM
HINDICA_D_14526_Transcript_1/1_m.50072_len:626	IPR002557	Chitin binding domain
HINDICA_D_14526_Transcript_1/1_m.50072_len:626	IPR011583	Chitinase II
HINDICA_D_14526_Transcript_1/1_m.50072_len:626	IPR002557	Chitin binding domain
HINDICA_D_14526_Transcript_1/1_m.50072_len:626	IPR001223	Glycoside hydrolase, family 18, catalytic domain
HINDICA_D_14526_Transcript_1/1_m.50072_len:626	IPR017853	Glycoside hydrolase, superfamily
HINDICA_D_14526_Transcript_1/1_m.50072_len:626	IPR013781	Glycoside hydrolase, catalytic domain
HINDICA_D_14526_Transcript_1/1_m.50072_len:626	IPR001579	Glycoside hydrolase, chitinase active site
HINDICA_D_14526_Transcript_1/1_m.50072_len:626	IPR002557	Chitin binding domain
HINDICA_D_5063_Transcript_1/5_m.161969_len:880	IPR001611	Leucine-rich repeat
HINDICA_D_5063_Transcript_1/5_m.161969_len:880	IPR003591	Leucine-rich repeat, typical subtype
HINDICA_D_5063_Transcript_1/5_m.161969_len:880	IPR001611	Leucine-rich repeat
HINDICA_D_3179_Transcript_2/2_m.111162_len:686	IPR000859	CUB domain
HINDICA_D_3179_Transcript_2/2_m.111162_len:686	IPR000884	Thrombospondin, type 1 repeat
HINDICA_D_3179_Transcript_2/2_m.111162_len:686	IPR000859	CUB domain
HINDICA_D_3179_Transcript_2/2_m.111162_len:686	IPR006026	Peptidase, metallopeptidase
HINDICA_D_3179_Transcript_2/2_m.111162_len:686	IPR000884	Thrombospondin, type 1 repeat
HINDICA_D_3179_Transcript_2/2_m.111162_len:686	IPR000859	CUB domain
HINDICA_D_3179_Transcript_2/2_m.111162_len:686	IPR000884	Thrombospondin, type 1 repeat
HINDICA_D_3179_Transcript_2/2_m.111162_len:686	IPR024079	Metallopeptidase, catalytic domain
HINDICA_D_3179_Transcript_2/2_m.111162_len:686	IPR001506	Peptidase M12A, astacin
HINDICA_D_3179_Transcript_2/2_m.111162_len:686	IPR013032	EGF-like, conserved site
HINDICA_D_3179_Transcript_2/2_m.111162_len:686	IPR000859	CUB domain
HINDICA_D_3179_Transcript_2/2_m.111162_len:686	IPR001506	Peptidase M12A, astacin
HINDICA_D_3179_Transcript_2/2_m.111162_len:686	IPR000884	Thrombospondin, type 1 repeat
HINDICA_D_3179_Transcript_1/2_m.167164_len:686	IPR000859	CUB domain
HINDICA_D_3179_Transcript_1/2_m.167164_len:686	IPR000884	Thrombospondin, type 1 repeat
HINDICA_D_3179_Transcript_1/2_m.167164_len:686	IPR000859	CUB domain
HINDICA_D_3179_Transcript_1/2_m.167164_len:686	IPR006026	Peptidase, metallopeptidase
HINDICA_D_3179_Transcript_1/2_m.167164_len:686	IPR000884	Thrombospondin, type 1 repeat
HINDICA_D_3179_Transcript_1/2_m.167164_len:686	IPR000859	CUB domain
HINDICA_D_3179_Transcript_1/2_m.167164_len:686	IPR000884	Thrombospondin, type 1 repeat
HINDICA_D_3179_Transcript_1/2_m.167164_len:686	IPR024079	Metallopeptidase, catalytic domain
HINDICA_D_3179_Transcript_1/2_m.167164_len:686	IPR001506	Peptidase M12A, astacin
HINDICA_D_3179_Transcript_1/2_m.167164_len:686	IPR013032	EGF-like, conserved site
HINDICA_D_3179_Transcript_1/2_m.167164_len:686	IPR000859	CUB domain
HINDICA_D_3179_Transcript_1/2_m.167164_len:686	IPR001506	Peptidase M12A, astacin
HINDICA_D_3179_Transcript_1/2_m.167164_len:686	IPR000884	Thrombospondin, type 1 repeat
HINDICA_D_68_Transcript_1/1_m.9806_len:499	IPR008922	Uncharacterised domain, di-copper centre
HINDICA_D_68_Transcript_1/1_m.9806_len:499	IPR002227	Tyrosinase
HINDICA_D_68_Transcript_1/1_m.9806_len:499	IPR008922	Uncharacterised domain, di-copper centre
HINDICA_D_68_Transcript_1/1_m.9806_len:499	IPR002227	Tyrosinase
HINDICA_D_4920_Transcript_2/4_m.165260_len:212	IPR002072	Nerve growth factor-related
HINDICA_D_7613_Transcript_1/1_m.102343_len:266	IPR018114	Peptidase S1, trypsin family, active site
HINDICA_D_7613_Transcript_1/1_m.102343_len:266	IPR009003	Trypsin-like cysteine/serine peptidase domain
HINDICA_D_7613_Transcript_1/1_m.102343_len:266	IPR001254	Peptidase S1
HINDICA_D_7613_Transcript_1/1_m.102343_len:266	IPR001314	Peptidase S1A, chymotrypsin-type
HINDICA_D_7613_Transcript_1/1_m.102343_len:266	IPR001254	Peptidase S1
HINDICA_D_9722_Transcript_2/5_m.157043_len:1314	IPR007110	Immunoglobulin-like domain
HINDICA_D_9722_Transcript_2/5_m.157043_len:1314	IPR013783	Immunoglobulin-like fold
HINDICA_D_9722_Transcript_2/5_m.157043_len:1314	IPR013162	CD80-like, immunoglobulin C2-set
HINDICA_D_9722_Transcript_2/5_m.157043_len:1314	IPR013783	Immunoglobulin-like fold
HINDICA_D_9722_Transcript_2/5_m.157043_len:1314	IPR003599	Immunoglobulin subtype
HINDICA_D_9722_Transcript_2/5_m.157043_len:1314	IPR013783	Immunoglobulin-like fold
HINDICA_D_9722_Transcript_2/5_m.157043_len:1314	IPR003961	Fibronectin, type III
HINDICA_D_9722_Transcript_2/5_m.157043_len:1314	IPR013783	Immunoglobulin-like fold
HINDICA_D_9722_Transcript_2/5_m.157043_len:1314	IPR007110	Immunoglobulin-like domain
HINDICA_D_9722_Transcript_2/5_m.157043_len:1314	IPR013098	Immunoglobulin I-set
HINDICA_D_9722_Transcript_2/5_m.157043_len:1314	IPR007110	Immunoglobulin-like domain
HINDICA_D_9722_Transcript_2/5_m.157043_len:1314	IPR013783	Immunoglobulin-like fold
HINDICA_D_9722_Transcript_2/5_m.157043_len:1314	IPR007110	Immunoglobulin-like domain
HINDICA_D_9722_Transcript_2/5_m.157043_len:1314	IPR003961	Fibronectin, type III
HINDICA_D_9722_Transcript_2/5_m.157043_len:1314	IPR003598	Immunoglobulin subtype 2
HINDICA_D_9722_Transcript_3/5_m.172683_len:1314	IPR007110	Immunoglobulin-like domain
HINDICA_D_9722_Transcript_3/5_m.172683_len:1314	IPR013783	Immunoglobulin-like fold
HINDICA_D_9722_Transcript_3/5_m.172683_len:1314	IPR013162	CD80-like, immunoglobulin C2-set
HINDICA_D_9722_Transcript_3/5_m.172683_len:1314	IPR013783	Immunoglobulin-like fold
HINDICA_D_9722_Transcript_3/5_m.172683_len:1314	IPR003599	Immunoglobulin subtype
HINDICA_D_9722_Transcript_3/5_m.172683_len:1314	IPR013783	Immunoglobulin-like fold
HINDICA_D_9722_Transcript_3/5_m.172683_len:1314	IPR003961	Fibronectin, type III
HINDICA_D_9722_Transcript_3/5_m.172683_len:1314	IPR013783	Immunoglobulin-like fold
HINDICA_D_9722_Transcript_3/5_m.172683_len:1314	IPR007110	Immunoglobulin-like domain
HINDICA_D_9722_Transcript_3/5_m.172683_len:1314	IPR013098	Immunoglobulin I-set
HINDICA_D_9722_Transcript_3/5_m.172683_len:1314	IPR007110	Immunoglobulin-like domain
HINDICA_D_9722_Transcript_3/5_m.172683_len:1314	IPR013783	Immunoglobulin-like fold
HINDICA_D_9722_Transcript_3/5_m.172683_len:1314	IPR007110	Immunoglobulin-like domain
HINDICA_D_9722_Transcript_3/5_m.172683_len:1314	IPR003961	Fibronectin, type III
HINDICA_D_9722_Transcript_3/5_m.172683_len:1314	IPR003598	Immunoglobulin subtype 2
HINDICA_D_9722_Transcript_5/5_m.152346_len:1314	IPR007110	Immunoglobulin-like domain
HINDICA_D_9722_Transcript_5/5_m.152346_len:1314	IPR013783	Immunoglobulin-like fold
HINDICA_D_9722_Transcript_5/5_m.152346_len:1314	IPR013162	CD80-like, immunoglobulin C2-set
HINDICA_D_9722_Transcript_5/5_m.152346_len:1314	IPR013783	Immunoglobulin-like fold
HINDICA_D_9722_Transcript_5/5_m.152346_len:1314	IPR003599	Immunoglobulin subtype
HINDICA_D_9722_Transcript_5/5_m.152346_len:1314	IPR013783	Immunoglobulin-like fold
HINDICA_D_9722_Transcript_5/5_m.152346_len:1314	IPR003961	Fibronectin, type III
HINDICA_D_9722_Transcript_5/5_m.152346_len:1314	IPR013783	Immunoglobulin-like fold
HINDICA_D_9722_Transcript_5/5_m.152346_len:1314	IPR007110	Immunoglobulin-like domain
HINDICA_D_9722_Transcript_5/5_m.152346_len:1314	IPR013098	Immunoglobulin I-set
HINDICA_D_9722_Transcript_5/5_m.152346_len:1314	IPR007110	Immunoglobulin-like domain
HINDICA_D_9722_Transcript_5/5_m.152346_len:1314	IPR013783	Immunoglobulin-like fold
HINDICA_D_9722_Transcript_5/5_m.152346_len:1314	IPR007110	Immunoglobulin-like domain
HINDICA_D_9722_Transcript_5/5_m.152346_len:1314	IPR003961	Fibronectin, type III
HINDICA_D_9722_Transcript_5/5_m.152346_len:1314	IPR003598	Immunoglobulin subtype 2
HINDICA_D_11421_Transcript_1/2_m.101033_len:366	IPR003599	Immunoglobulin subtype
HINDICA_D_11421_Transcript_1/2_m.101033_len:366	IPR007110	Immunoglobulin-like domain
HINDICA_D_11421_Transcript_1/2_m.101033_len:366	IPR013783	Immunoglobulin-like fold
HINDICA_D_11421_Transcript_1/2_m.101033_len:366	IPR003598	Immunoglobulin subtype 2
HINDICA_D_11421_Transcript_1/2_m.101033_len:366	IPR013783	Immunoglobulin-like fold
HINDICA_D_11421_Transcript_1/2_m.101033_len:366	IPR013098	Immunoglobulin I-set
HINDICA_D_5063_Transcript_2/5_m.149008_len:514	IPR001611	Leucine-rich repeat
HINDICA_D_5063_Transcript_2/5_m.149008_len:514	IPR003591	Leucine-rich repeat, typical subtype
HINDICA_D_5063_Transcript_2/5_m.149008_len:514	IPR001611	Leucine-rich repeat
HINDICA_D_11462_Transcript_1/1_m.87333_len:417	IPR025483	Lipase, eukaryotic
HINDICA_D_11462_Transcript_1/1_m.87333_len:417	IPR000073	Alpha/beta hydrolase fold-1
HINDICA_D_11462_Transcript_1/1_m.87333_len:417	IPR006693	Partial AB-hydrolase lipase domain
HINDICA_D_10198_Transcript_2/2_m.165714_len:697	IPR002110	Ankyrin repeat
HINDICA_D_10198_Transcript_2/2_m.165714_len:697	IPR013083	Zinc finger, RING/FYVE/PHD-type
HINDICA_D_10198_Transcript_2/2_m.165714_len:697	IPR020683	Ankyrin repeat-containing domain
HINDICA_D_10198_Transcript_2/2_m.165714_len:697	IPR002110	Ankyrin repeat
HINDICA_D_10198_Transcript_2/2_m.165714_len:697	IPR000306	FYVE zinc finger
HINDICA_D_10198_Transcript_2/2_m.165714_len:697	IPR020683	Ankyrin repeat-containing domain
HINDICA_D_10198_Transcript_2/2_m.165714_len:697	IPR002110	Ankyrin repeat
HINDICA_D_10198_Transcript_2/2_m.165714_len:697	IPR020683	Ankyrin repeat-containing domain
HINDICA_D_10198_Transcript_2/2_m.165714_len:697	IPR011011	Zinc finger, FYVE/PHD-type
HINDICA_D_10198_Transcript_2/2_m.165714_len:697	IPR020683	Ankyrin repeat-containing domain
HINDICA_D_10198_Transcript_2/2_m.165714_len:697	IPR002110	Ankyrin repeat
HINDICA_D_10198_Transcript_2/2_m.165714_len:697	IPR020683	Ankyrin repeat-containing domain
HINDICA_D_10198_Transcript_2/2_m.165714_len:697	IPR017455	Zinc finger, FYVE-related
HINDICA_D_10198_Transcript_2/2_m.165714_len:697	IPR002110	Ankyrin repeat
HINDICA_D_10198_Transcript_2/2_m.165714_len:697	IPR020683	Ankyrin repeat-containing domain
HINDICA_D_17200_Transcript_1/1_m.37895_len:229	IPR012336	Thioredoxin-like fold
HINDICA_D_5465_Transcript_3/3_m.160500_len:151	IPR019783	Ribosome maturation protein SBDS, N-terminal
HINDICA_D_5465_Transcript_3/3_m.160500_len:151	IPR018023	Ribosome maturation protein SBDS, conserved site
HINDICA_D_5465_Transcript_3/3_m.160500_len:151	IPR019783	Ribosome maturation protein SBDS, N-terminal
HINDICA_D_2221_Transcript_1/1_m.11821_len:390	IPR001452	Src homology-3 domain
HINDICA_D_2221_Transcript_1/1_m.11821_len:390	IPR002014	VHS
HINDICA_D_2221_Transcript_1/1_m.11821_len:390	IPR003903	Ubiquitin interacting motif
HINDICA_D_2221_Transcript_1/1_m.11821_len:390	IPR002014	VHS
HINDICA_D_2221_Transcript_1/1_m.11821_len:390	IPR001452	Src homology-3 domain
HINDICA_D_2221_Transcript_1/1_m.11821_len:390	IPR008942	ENTH/VHS
HINDICA_D_2221_Transcript_1/1_m.11821_len:390	IPR018205	VHS subgroup
HINDICA_D_2221_Transcript_1/1_m.11821_len:390	IPR008942	ENTH/VHS
HINDICA_D_2221_Transcript_1/1_m.11821_len:390	IPR001452	Src homology-3 domain
HINDICA_D_765_Transcript_2/3_m.159302_len:377	IPR001128	Cytochrome P450
HINDICA_D_765_Transcript_2/3_m.159302_len:377	IPR002401	Cytochrome P450, E-class, group I
HINDICA_D_765_Transcript_2/3_m.159302_len:377	IPR001128	Cytochrome P450
HINDICA_D_2427_Transcript_6/6_m.110799_len:1682	IPR018497	Peptidase M13, C-terminal domain
HINDICA_D_2427_Transcript_6/6_m.110799_len:1682	IPR008753	Peptidase M13, N-terminal domain
HINDICA_D_2427_Transcript_6/6_m.110799_len:1682	IPR024079	Metallopeptidase, catalytic domain
HINDICA_D_2427_Transcript_6/6_m.110799_len:1682	IPR018497	Peptidase M13, C-terminal domain
HINDICA_D_4672_Transcript_1/3_m.145717_len:925	IPR011009	Protein kinase-like domain
HINDICA_D_4672_Transcript_1/3_m.145717_len:925	IPR002219	Protein kinase C-like, phorbol ester/diacylglycerol binding
HINDICA_D_4672_Transcript_1/3_m.145717_len:925	IPR020454	Diacylglycerol/phorbol-ester binding
HINDICA_D_4672_Transcript_1/3_m.145717_len:925	IPR001849	Pleckstrin homology domain
HINDICA_D_4672_Transcript_1/3_m.145717_len:925	IPR002219	Protein kinase C-like, phorbol ester/diacylglycerol binding
HINDICA_D_4672_Transcript_1/3_m.145717_len:925	IPR008271	Serine/threonine-protein kinase, active site
HINDICA_D_4672_Transcript_1/3_m.145717_len:925	IPR011993	Pleckstrin homology-like domain
HINDICA_D_4672_Transcript_1/3_m.145717_len:925	IPR017441	Protein kinase, ATP binding site
HINDICA_D_4672_Transcript_1/3_m.145717_len:925	IPR000719	Protein kinase domain
HINDICA_D_4672_Transcript_1/3_m.145717_len:925	IPR002219	Protein kinase C-like, phorbol ester/diacylglycerol binding
HINDICA_D_4672_Transcript_1/3_m.145717_len:925	IPR002290	Serine/threonine- / dual specificity protein kinase, catalytic domain
HINDICA_D_4672_Transcript_1/3_m.145717_len:925	IPR000719	Protein kinase domain
HINDICA_D_6256_Transcript_1/1_m.40057_len:353	IPR025660	Cysteine peptidase, histidine active site
HINDICA_D_6256_Transcript_1/1_m.40057_len:353	IPR000668	Peptidase C1A, papain C-terminal
HINDICA_D_6256_Transcript_1/1_m.40057_len:353	IPR000169	Cysteine peptidase, cysteine active site
HINDICA_D_6256_Transcript_1/1_m.40057_len:353	IPR025661	Cysteine peptidase, asparagine active site
HINDICA_D_6256_Transcript_1/1_m.40057_len:353	IPR000668	Peptidase C1A, papain C-terminal
HINDICA_D_6500_Transcript_2/2_m.102667_len:384	IPR008266	Tyrosine-protein kinase, active site
HINDICA_D_6500_Transcript_2/2_m.102667_len:384	IPR001245	Serine-threonine/tyrosine-protein kinase catalytic domain
HINDICA_D_6500_Transcript_2/2_m.102667_len:384	IPR000719	Protein kinase domain
HINDICA_D_6500_Transcript_2/2_m.102667_len:384	IPR011009	Protein kinase-like domain
HINDICA_D_6500_Transcript_1/2_m.90764_len:384	IPR008266	Tyrosine-protein kinase, active site
HINDICA_D_6500_Transcript_1/2_m.90764_len:384	IPR001245	Serine-threonine/tyrosine-protein kinase catalytic domain
HINDICA_D_6500_Transcript_1/2_m.90764_len:384	IPR000719	Protein kinase domain
HINDICA_D_6500_Transcript_1/2_m.90764_len:384	IPR011009	Protein kinase-like domain
HINDICA_D_15283_Transcript_3/3_m.51938_len:207	IPR018101	Translation elongation factor Ts, conserved site
HINDICA_D_15283_Transcript_3/3_m.51938_len:207	IPR014039	Translation elongation factor EFTs/EF1B, dimerisation
HINDICA_D_15283_Transcript_3/3_m.51938_len:207	IPR001816	Translation elongation factor EFTs/EF1B
HINDICA_D_15283_Transcript_3/3_m.51938_len:207	IPR009060	UBA-like
HINDICA_D_15283_Transcript_3/3_m.51938_len:207	IPR000449	Ubiquitin-associated domain/translation elongation factor EF-Ts, N-terminal
HINDICA_D_11004_Transcript_1/2_m.108672_len:159	IPR001304	C-type lectin
HINDICA_D_11004_Transcript_1/2_m.108672_len:159	IPR016187	C-type lectin fold
HINDICA_D_11004_Transcript_1/2_m.108672_len:159	IPR001304	C-type lectin
HINDICA_D_11004_Transcript_1/2_m.108672_len:159	IPR016186	C-type lectin-like
HINDICA_D_11004_Transcript_1/2_m.108672_len:159	IPR001304	C-type lectin
HINDICA_D_11004_Transcript_2/2_m.47035_len:159	IPR001304	C-type lectin
HINDICA_D_11004_Transcript_2/2_m.47035_len:159	IPR016187	C-type lectin fold
HINDICA_D_11004_Transcript_2/2_m.47035_len:159	IPR001304	C-type lectin
HINDICA_D_11004_Transcript_2/2_m.47035_len:159	IPR016186	C-type lectin-like
HINDICA_D_11004_Transcript_2/2_m.47035_len:159	IPR001304	C-type lectin
HINDICA_D_4264_Transcript_1/2_m.122765_len:602	IPR003146	Proteinase inhibitor, carboxypeptidase propeptide
HINDICA_D_4264_Transcript_1/2_m.122765_len:602	IPR000834	Peptidase M14, carboxypeptidase A
HINDICA_D_4264_Transcript_1/2_m.122765_len:602	IPR003582	Metridin-like ShK toxin
HINDICA_D_4264_Transcript_1/2_m.122765_len:602	IPR000834	Peptidase M14, carboxypeptidase A
HINDICA_D_4264_Transcript_1/2_m.122765_len:602	IPR009020	Proteinase inhibitor, propeptide
HINDICA_D_4264_Transcript_1/2_m.122765_len:602	IPR000834	Peptidase M14, carboxypeptidase A
HINDICA_D_4264_Transcript_1/2_m.122765_len:602	IPR003146	Proteinase inhibitor, carboxypeptidase propeptide
HINDICA_D_172_Transcript_4/5_m.163481_len:685	IPR003439	ABC transporter-like
HINDICA_D_172_Transcript_4/5_m.163481_len:685	IPR017871	ABC transporter, conserved site
HINDICA_D_172_Transcript_4/5_m.163481_len:685	IPR011527	ABC transporter, transmembrane domain, type 1
HINDICA_D_172_Transcript_4/5_m.163481_len:685	IPR017940	ABC transporter, integral membrane type 1
HINDICA_D_172_Transcript_4/5_m.163481_len:685	IPR027417	P-loop containing nucleoside triphosphate hydrolase
HINDICA_D_172_Transcript_4/5_m.163481_len:685	IPR003593	AAA+ ATPase domain
HINDICA_D_172_Transcript_4/5_m.163481_len:685	IPR010509	ABC transporter, N-terminal
HINDICA_D_172_Transcript_4/5_m.163481_len:685	IPR003439	ABC transporter-like
HINDICA_D_172_Transcript_5/5_m.155764_len:685	IPR003439	ABC transporter-like
HINDICA_D_172_Transcript_5/5_m.155764_len:685	IPR017871	ABC transporter, conserved site
HINDICA_D_172_Transcript_5/5_m.155764_len:685	IPR011527	ABC transporter, transmembrane domain, type 1
HINDICA_D_172_Transcript_5/5_m.155764_len:685	IPR017940	ABC transporter, integral membrane type 1
HINDICA_D_172_Transcript_5/5_m.155764_len:685	IPR027417	P-loop containing nucleoside triphosphate hydrolase
HINDICA_D_172_Transcript_5/5_m.155764_len:685	IPR003593	AAA+ ATPase domain
HINDICA_D_172_Transcript_5/5_m.155764_len:685	IPR010509	ABC transporter, N-terminal
HINDICA_D_172_Transcript_5/5_m.155764_len:685	IPR003439	ABC transporter-like
HINDICA_D_3457_Transcript_1/1_m.3229_len:698	IPR015849	Amyloidogenic glycoprotein, heparin-binding
HINDICA_D_3457_Transcript_1/1_m.3229_len:698	IPR024329	Amyloidogenic glycoprotein, E2 domain
HINDICA_D_3457_Transcript_1/1_m.3229_len:698	IPR011178	Amyloidogenic glycoprotein, copper-binding
HINDICA_D_3457_Transcript_1/1_m.3229_len:698	IPR008154	Amyloidogenic glycoprotein, extracellular
HINDICA_D_3457_Transcript_1/1_m.3229_len:698	IPR011178	Amyloidogenic glycoprotein, copper-binding
HINDICA_D_3457_Transcript_1/1_m.3229_len:698	IPR019744	Amyloidogenic glycoprotein, extracellular domain conserved site
HINDICA_D_3457_Transcript_1/1_m.3229_len:698	IPR024329	Amyloidogenic glycoprotein, E2 domain
HINDICA_D_6314_Transcript_2/3_m.137274_len:823	IPR003961	Fibronectin, type III
HINDICA_D_6314_Transcript_2/3_m.137274_len:823	IPR013783	Immunoglobulin-like fold
HINDICA_D_6314_Transcript_2/3_m.137274_len:823	IPR003961	Fibronectin, type III
HINDICA_D_6314_Transcript_2/3_m.137274_len:823	IPR008197	Whey acidic protein-type 4-disulphide core
HINDICA_D_6314_Transcript_2/3_m.137274_len:823	IPR013783	Immunoglobulin-like fold
HINDICA_D_6314_Transcript_2/3_m.137274_len:823	IPR008197	Whey acidic protein-type 4-disulphide core
HINDICA_D_6314_Transcript_2/3_m.137274_len:823	IPR003961	Fibronectin, type III
HINDICA_D_6314_Transcript_2/3_m.137274_len:823	IPR013783	Immunoglobulin-like fold
HINDICA_D_6314_Transcript_2/3_m.137274_len:823	IPR008197	Whey acidic protein-type 4-disulphide core
HINDICA_D_1218_Transcript_1/2_m.30896_len:541	IPR001139	Glycoside hydrolase, family 30
HINDICA_D_1218_Transcript_1/2_m.30896_len:541	IPR017853	Glycoside hydrolase, superfamily
HINDICA_D_1218_Transcript_1/2_m.30896_len:541	IPR013780	Glycosyl hydrolase, family 13, all-beta
HINDICA_D_1218_Transcript_1/2_m.30896_len:541	IPR013781	Glycoside hydrolase, catalytic domain
HINDICA_D_4249_Transcript_2/2_m.35153_len:302	IPR017907	Zinc finger, RING-type, conserved site
HINDICA_D_4249_Transcript_2/2_m.35153_len:302	IPR001841	Zinc finger, RING-type
HINDICA_D_4249_Transcript_2/2_m.35153_len:302	IPR013083	Zinc finger, RING/FYVE/PHD-type
HINDICA_D_8131_Transcript_1/1_m.140209_len:176	IPR018152	Superoxide dismutase, copper/zinc, binding site
HINDICA_D_8131_Transcript_1/1_m.140209_len:176	IPR001424	Superoxide dismutase, copper/zinc binding domain
HINDICA_D_1025_Transcript_1/2_m.149186_len:451	IPR013126	Heat shock protein 70 family
HINDICA_D_1025_Transcript_1/2_m.149186_len:451	IPR018181	Heat shock protein 70, conserved site
HINDICA_D_1025_Transcript_1/2_m.149186_len:451	IPR013126	Heat shock protein 70 family
HINDICA_D_1025_Transcript_1/2_m.149186_len:451	IPR018181	Heat shock protein 70, conserved site
HINDICA_D_1349_Transcript_1/1_m.4378_len:93	IPR002172	Low-density lipoprotein (LDL) receptor class A repeat
HINDICA_D_603_Transcript_1/1_m.23040_len:485	IPR001452	Src homology-3 domain
HINDICA_D_6480_Transcript_2/3_m.118754_len:337	IPR002893	Zinc finger, MYND-type
HINDICA_D_9455_Transcript_1/1_m.98014_len:1126	IPR004014	Cation-transporting P-type ATPase, N-terminal
HINDICA_D_9455_Transcript_1/1_m.98014_len:1126	IPR018303	P-type ATPase, phosphorylation site
HINDICA_D_9455_Transcript_1/1_m.98014_len:1126	IPR008250	P-type ATPase, A domain
HINDICA_D_9455_Transcript_1/1_m.98014_len:1126	IPR001757	Cation-transporting P-type ATPase
HINDICA_D_9455_Transcript_1/1_m.98014_len:1126	IPR004014	Cation-transporting P-type ATPase, N-terminal
HINDICA_D_9455_Transcript_1/1_m.98014_len:1126	IPR001757	Cation-transporting P-type ATPase
HINDICA_D_9455_Transcript_1/1_m.98014_len:1126	IPR023299	P-type ATPase, cytoplasmic domain N
HINDICA_D_9455_Transcript_1/1_m.98014_len:1126	IPR006068	Cation-transporting P-type ATPase, C-terminal
HINDICA_D_9455_Transcript_1/1_m.98014_len:1126	IPR023214	HAD-like domain
HINDICA_D_9455_Transcript_1/1_m.98014_len:1126	IPR008250	P-type ATPase, A domain
HINDICA_D_9455_Transcript_1/1_m.98014_len:1126	IPR023298	P-type ATPase, transmembrane domain
HINDICA_D_10584_Transcript_1/1_m.74637_len:253	IPR012334	Pectin lyase fold
HINDICA_D_10584_Transcript_1/1_m.74637_len:253	IPR004898	Pectate lyase, catalytic
HINDICA_D_10584_Transcript_1/1_m.74637_len:253	IPR011050	Pectin lyase fold/virulence factor
HINDICA_D_2303_Transcript_1/1_m.145690_len:387	IPR001507	Zona pellucida domain
HINDICA_D_5080_Transcript_2/3_m.46137_len:200	IPR003579	Small GTPase superfamily, Rab type
HINDICA_D_5080_Transcript_2/3_m.46137_len:200	IPR001806	Small GTPase superfamily
HINDICA_D_5080_Transcript_2/3_m.46137_len:200	IPR020849	Small GTPase superfamily, Ras type
HINDICA_D_5080_Transcript_2/3_m.46137_len:200	IPR001806	Small GTPase superfamily
HINDICA_D_5080_Transcript_2/3_m.46137_len:200	IPR005225	Small GTP-binding protein domain
HINDICA_D_5080_Transcript_2/3_m.46137_len:200	IPR027417	P-loop containing nucleoside triphosphate hydrolase
HINDICA_D_5080_Transcript_2/3_m.46137_len:200	IPR003578	Small GTPase superfamily, Rho type
HINDICA_D_4114_Transcript_1/1_m.36217_len:366	IPR001623	DnaJ domain
HINDICA_D_4114_Transcript_1/1_m.36217_len:366	IPR002939	Chaperone DnaJ, C-terminal
HINDICA_D_4114_Transcript_1/1_m.36217_len:366	IPR018253	DnaJ domain, conserved site
HINDICA_D_4114_Transcript_1/1_m.36217_len:366	IPR001623	DnaJ domain
HINDICA_D_4114_Transcript_1/1_m.36217_len:366	IPR008971	HSP40/DnaJ peptide-binding
HINDICA_D_4114_Transcript_1/1_m.36217_len:366	IPR001623	DnaJ domain
HINDICA_D_5308_Transcript_1/1_m.110360_len:631	IPR011001	Saposin-like
HINDICA_D_5308_Transcript_1/1_m.110360_len:631	IPR011160	Sphingomyelin phosphodiesterase
HINDICA_D_5308_Transcript_1/1_m.110360_len:631	IPR011001	Saposin-like
HINDICA_D_5308_Transcript_1/1_m.110360_len:631	IPR008139	Saposin B
HINDICA_D_5308_Transcript_1/1_m.110360_len:631	IPR004843	Phosphoesterase domain
HINDICA_D_932_Transcript_3/5_m.52285_len:628	IPR023299	P-type ATPase, cytoplasmic domain N
HINDICA_D_932_Transcript_3/5_m.52285_len:628	IPR001757	Cation-transporting P-type ATPase
HINDICA_D_932_Transcript_3/5_m.52285_len:628	IPR023214	HAD-like domain
HINDICA_D_932_Transcript_3/5_m.52285_len:628	IPR027256	Cation-transporting P-type ATPase, subfamily IB
HINDICA_D_932_Transcript_3/5_m.52285_len:628	IPR001757	Cation-transporting P-type ATPase
HINDICA_D_932_Transcript_3/5_m.52285_len:628	IPR008250	P-type ATPase, A domain
HINDICA_D_932_Transcript_3/5_m.52285_len:628	IPR001757	Cation-transporting P-type ATPase
HINDICA_D_932_Transcript_3/5_m.52285_len:628	IPR023214	HAD-like domain
HINDICA_D_932_Transcript_3/5_m.52285_len:628	IPR018303	P-type ATPase, phosphorylation site
HINDICA_D_932_Transcript_3/5_m.52285_len:628	IPR023214	HAD-like domain
HINDICA_D_5465_Transcript_1/3_m.13923_len:270	IPR018978	Ribosome maturation protein SBDS, C-terminal
HINDICA_D_5465_Transcript_1/3_m.13923_len:270	IPR018023	Ribosome maturation protein SBDS, conserved site
HINDICA_D_5465_Transcript_1/3_m.13923_len:270	IPR019783	Ribosome maturation protein SBDS, N-terminal
HINDICA_D_5465_Transcript_1/3_m.13923_len:270	IPR002140	Ribosome maturation protein SBDS
HINDICA_D_5465_Transcript_1/3_m.13923_len:270	IPR019783	Ribosome maturation protein SBDS, N-terminal
HINDICA_D_4621_Transcript_1/3_m.121173_len:1306	IPR010513	KEN domain
HINDICA_D_4621_Transcript_1/3_m.121173_len:1306	IPR008271	Serine/threonine-protein kinase, active site
HINDICA_D_4621_Transcript_1/3_m.121173_len:1306	IPR027295	Quinonprotein alcohol dehydrogenase-like domain
HINDICA_D_4621_Transcript_1/3_m.121173_len:1306	IPR002290	Serine/threonine- / dual specificity protein kinase, catalytic domain
HINDICA_D_4621_Transcript_1/3_m.121173_len:1306	IPR006567	PUG domain
HINDICA_D_4621_Transcript_1/3_m.121173_len:1306	IPR018391	Pyrrolo-quinoline quinone beta-propeller repeat
HINDICA_D_4621_Transcript_1/3_m.121173_len:1306	IPR010513	KEN domain
HINDICA_D_4621_Transcript_1/3_m.121173_len:1306	IPR000719	Protein kinase domain
HINDICA_D_4621_Transcript_1/3_m.121173_len:1306	IPR011047	Quinonprotein alcohol dehydrogenase-like superfamily
HINDICA_D_4621_Transcript_1/3_m.121173_len:1306	IPR011009	Protein kinase-like domain
HINDICA_D_14234_Transcript_1/1_m.36258_len:75	IPR017986	WD40-repeat-containing domain
HINDICA_D_14234_Transcript_1/1_m.36258_len:75	IPR015943	WD40/YVTN repeat-like-containing domain
HINDICA_D_4745_Transcript_1/2_m.162695_len:233	IPR026591	Sirtuin family, catalytic core small domain
HINDICA_D_4745_Transcript_1/2_m.162695_len:233	IPR003000	Sirtuin family
HINDICA_D_4745_Transcript_1/2_m.162695_len:233	IPR026590	Sirtuin family, catalytic core domain
HINDICA_D_5294_Transcript_2/2_m.96816_len:674	IPR006863	Erv1/Alr
HINDICA_D_5294_Transcript_2/2_m.96816_len:674	IPR012336	Thioredoxin-like fold
HINDICA_D_5294_Transcript_2/2_m.96816_len:674	IPR013766	Thioredoxin domain
HINDICA_D_5294_Transcript_2/2_m.96816_len:674	IPR012336	Thioredoxin-like fold
HINDICA_D_5294_Transcript_2/2_m.96816_len:674	IPR017905	ERV/ALR sulphydryl oxidase
HINDICA_D_5294_Transcript_2/2_m.96816_len:674	IPR006863	Erv1/Alr
HINDICA_D_5294_Transcript_2/2_m.96816_len:674	IPR012336	Thioredoxin-like fold
HINDICA_D_5294_Transcript_1/2_m.76786_len:674	IPR006863	Erv1/Alr
HINDICA_D_5294_Transcript_1/2_m.76786_len:674	IPR012336	Thioredoxin-like fold
HINDICA_D_5294_Transcript_1/2_m.76786_len:674	IPR013766	Thioredoxin domain
HINDICA_D_5294_Transcript_1/2_m.76786_len:674	IPR012336	Thioredoxin-like fold
HINDICA_D_5294_Transcript_1/2_m.76786_len:674	IPR017905	ERV/ALR sulphydryl oxidase
HINDICA_D_5294_Transcript_1/2_m.76786_len:674	IPR006863	Erv1/Alr
HINDICA_D_5294_Transcript_1/2_m.76786_len:674	IPR012336	Thioredoxin-like fold
HINDICA_D_4751_Transcript_2/6_m.155197_len:250	IPR001547	Glycoside hydrolase, family 5
HINDICA_D_4751_Transcript_2/6_m.155197_len:250	IPR018087	Glycoside hydrolase, family 5, conserved site
HINDICA_D_4751_Transcript_2/6_m.155197_len:250	IPR013781	Glycoside hydrolase, catalytic domain
HINDICA_D_4751_Transcript_2/6_m.155197_len:250	IPR017853	Glycoside hydrolase, superfamily
HINDICA_D_3726_Transcript_3/3_m.124820_len:251	IPR000175	Sodium:neurotransmitter symporter
HINDICA_D_4171_Transcript_1/1_m.108564_len:1163	IPR011993	Pleckstrin homology-like domain
HINDICA_D_4171_Transcript_1/1_m.108564_len:1163	IPR000219	Dbl homology (DH) domain
HINDICA_D_4171_Transcript_1/1_m.108564_len:1163	IPR001849	Pleckstrin homology domain
HINDICA_D_4171_Transcript_1/1_m.108564_len:1163	IPR002219	Protein kinase C-like, phorbol ester/diacylglycerol binding
HINDICA_D_4171_Transcript_1/1_m.108564_len:1163	IPR000219	Dbl homology (DH) domain
HINDICA_D_4171_Transcript_1/1_m.108564_len:1163	IPR002219	Protein kinase C-like, phorbol ester/diacylglycerol binding
HINDICA_D_4171_Transcript_1/1_m.108564_len:1163	IPR001849	Pleckstrin homology domain
HINDICA_D_4171_Transcript_1/1_m.108564_len:1163	IPR000219	Dbl homology (DH) domain
HINDICA_D_4171_Transcript_1/1_m.108564_len:1163	IPR002219	Protein kinase C-like, phorbol ester/diacylglycerol binding
HINDICA_D_4171_Transcript_1/1_m.108564_len:1163	IPR000219	Dbl homology (DH) domain
HINDICA_D_4171_Transcript_1/1_m.108564_len:1163	IPR002219	Protein kinase C-like, phorbol ester/diacylglycerol binding
HINDICA_D_13766_Transcript_1/1_m.16148_len:305	IPR024049	Peptide Chain Release Factor eRF1/aRF1, N-terminal
HINDICA_D_13766_Transcript_1/1_m.16148_len:305	IPR005141	eRF1 domain 2
HINDICA_D_13766_Transcript_1/1_m.16148_len:305	IPR005140	eRF1 domain 1/Pelota-like
HINDICA_D_13766_Transcript_1/1_m.16148_len:305	IPR004403	Peptide chain release factor eRF1/aRF1
HINDICA_D_10239_Transcript_2/2_m.136858_len:549	IPR024079	Metallopeptidase, catalytic domain
HINDICA_D_10239_Transcript_2/2_m.136858_len:549	IPR001506	Peptidase M12A, astacin
HINDICA_D_10239_Transcript_2/2_m.136858_len:549	IPR006026	Peptidase, metallopeptidase
HINDICA_D_3470_Transcript_1/1_m.44292_len:556	IPR011547	Sulphate transporter
HINDICA_D_7294_Transcript_1/1_m.56654_len:1434	IPR003961	Fibronectin, type III
HINDICA_D_7294_Transcript_1/1_m.56654_len:1434	IPR013098	Immunoglobulin I-set
HINDICA_D_7294_Transcript_1/1_m.56654_len:1434	IPR013783	Immunoglobulin-like fold
HINDICA_D_7294_Transcript_1/1_m.56654_len:1434	IPR003961	Fibronectin, type III
HINDICA_D_7294_Transcript_1/1_m.56654_len:1434	IPR013783	Immunoglobulin-like fold
HINDICA_D_7294_Transcript_1/1_m.56654_len:1434	IPR007110	Immunoglobulin-like domain
HINDICA_D_7294_Transcript_1/1_m.56654_len:1434	IPR003598	Immunoglobulin subtype 2
HINDICA_D_7294_Transcript_1/1_m.56654_len:1434	IPR003599	Immunoglobulin subtype
HINDICA_D_7294_Transcript_1/1_m.56654_len:1434	IPR026966	Neurofascin/L1/NrCAM, C-terminal domain
HINDICA_D_7294_Transcript_1/1_m.56654_len:1434	IPR007110	Immunoglobulin-like domain
HINDICA_D_7294_Transcript_1/1_m.56654_len:1434	IPR013783	Immunoglobulin-like fold
HINDICA_D_7294_Transcript_1/1_m.56654_len:1434	IPR007110	Immunoglobulin-like domain
HINDICA_D_7294_Transcript_1/1_m.56654_len:1434	IPR003961	Fibronectin, type III
HINDICA_D_7294_Transcript_1/1_m.56654_len:1434	IPR013783	Immunoglobulin-like fold
HINDICA_D_7294_Transcript_1/1_m.56654_len:1434	IPR007110	Immunoglobulin-like domain
HINDICA_D_7294_Transcript_1/1_m.56654_len:1434	IPR003961	Fibronectin, type III
HINDICA_D_7294_Transcript_1/1_m.56654_len:1434	IPR013783	Immunoglobulin-like fold
HINDICA_D_7294_Transcript_1/1_m.56654_len:1434	IPR007110	Immunoglobulin-like domain
HINDICA_D_7294_Transcript_1/1_m.56654_len:1434	IPR003961	Fibronectin, type III
HINDICA_D_7294_Transcript_1/1_m.56654_len:1434	IPR013783	Immunoglobulin-like fold
HINDICA_D_7294_Transcript_1/1_m.56654_len:1434	IPR003961	Fibronectin, type III
HINDICA_D_674_Transcript_3/3_m.84826_len:1262	IPR002126	Cadherin
HINDICA_D_674_Transcript_3/3_m.84826_len:1262	IPR000742	Epidermal growth factor-like domain
HINDICA_D_674_Transcript_3/3_m.84826_len:1262	IPR002126	Cadherin
HINDICA_D_674_Transcript_3/3_m.84826_len:1262	IPR008985	Concanavalin A-like lectin/glucanases superfamily
HINDICA_D_674_Transcript_3/3_m.84826_len:1262	IPR002126	Cadherin
HINDICA_D_674_Transcript_3/3_m.84826_len:1262	IPR015919	Cadherin-like
HINDICA_D_674_Transcript_3/3_m.84826_len:1262	IPR001791	Laminin G domain
HINDICA_D_674_Transcript_3/3_m.84826_len:1262	IPR002126	Cadherin
HINDICA_D_674_Transcript_3/3_m.84826_len:1262	IPR001791	Laminin G domain
HINDICA_D_674_Transcript_3/3_m.84826_len:1262	IPR008985	Concanavalin A-like lectin/glucanases superfamily
HINDICA_D_674_Transcript_3/3_m.84826_len:1262	IPR013032	EGF-like, conserved site
HINDICA_D_674_Transcript_3/3_m.84826_len:1262	IPR001791	Laminin G domain
HINDICA_D_674_Transcript_3/3_m.84826_len:1262	IPR013320	Concanavalin A-like lectin/glucanase, subgroup
HINDICA_D_674_Transcript_3/3_m.84826_len:1262	IPR020894	Cadherin conserved site
HINDICA_D_674_Transcript_3/3_m.84826_len:1262	IPR000742	Epidermal growth factor-like domain
HINDICA_D_674_Transcript_3/3_m.84826_len:1262	IPR013320	Concanavalin A-like lectin/glucanase, subgroup
HINDICA_D_674_Transcript_3/3_m.84826_len:1262	IPR015919	Cadherin-like
HINDICA_D_674_Transcript_3/3_m.84826_len:1262	IPR013032	EGF-like, conserved site
HINDICA_D_674_Transcript_3/3_m.84826_len:1262	IPR002126	Cadherin
HINDICA_D_4185_Transcript_1/1_m.138884_len:204	IPR016196	Major facilitator superfamily domain, general substrate transporter
HINDICA_D_4185_Transcript_1/1_m.138884_len:204	IPR011701	Major facilitator superfamily
HINDICA_D_2818_Transcript_1/1_m.20900_len:261	IPR012336	Thioredoxin-like fold
HINDICA_D_8601_Transcript_1/1_m.132898_len:99	IPR000608	Ubiquitin-conjugating enzyme, E2
HINDICA_D_8601_Transcript_1/1_m.132898_len:99	IPR016135	Ubiquitin-conjugating enzyme/RWD-like
HINDICA_D_8601_Transcript_1/1_m.132898_len:99	IPR000608	Ubiquitin-conjugating enzyme, E2
HINDICA_D_8601_Transcript_1/1_m.132898_len:99	IPR016135	Ubiquitin-conjugating enzyme/RWD-like
HINDICA_D_7099_Transcript_1/2_m.131355_len:434	IPR001818	Peptidase M10, metallopeptidase
HINDICA_D_7099_Transcript_1/2_m.131355_len:434	IPR021190	Peptidase M10A
HINDICA_D_7099_Transcript_1/2_m.131355_len:434	IPR024079	Metallopeptidase, catalytic domain
HINDICA_D_7099_Transcript_1/2_m.131355_len:434	IPR002477	Peptidoglycan binding-like
HINDICA_D_7099_Transcript_1/2_m.131355_len:434	IPR006026	Peptidase, metallopeptidase
HINDICA_D_7099_Transcript_1/2_m.131355_len:434	IPR002477	Peptidoglycan binding-like
HINDICA_D_14764_Transcript_1/1_m.129334_len:520	IPR006202	Neurotransmitter-gated ion-channel ligand-binding
HINDICA_D_14764_Transcript_1/1_m.129334_len:520	IPR002394	Nicotinic acetylcholine receptor
HINDICA_D_14764_Transcript_1/1_m.129334_len:520	IPR027361	Nicotinic acetylcholine-gated receptor, transmembrane domain
HINDICA_D_14764_Transcript_1/1_m.129334_len:520	IPR006201	Neurotransmitter-gated ion-channel
HINDICA_D_14764_Transcript_1/1_m.129334_len:520	IPR006202	Neurotransmitter-gated ion-channel ligand-binding
HINDICA_D_14764_Transcript_1/1_m.129334_len:520	IPR006029	Neurotransmitter-gated ion-channel transmembrane domain
HINDICA_D_14764_Transcript_1/1_m.129334_len:520	IPR018000	Neurotransmitter-gated ion-channel, conserved site
HINDICA_D_14764_Transcript_1/1_m.129334_len:520	IPR006029	Neurotransmitter-gated ion-channel transmembrane domain
HINDICA_D_3101_Transcript_1/1_m.114254_len:395	IPR002110	Ankyrin repeat
HINDICA_D_3101_Transcript_1/1_m.114254_len:395	IPR020683	Ankyrin repeat-containing domain
HINDICA_D_3101_Transcript_1/1_m.114254_len:395	IPR002110	Ankyrin repeat
HINDICA_D_3101_Transcript_1/1_m.114254_len:395	IPR020683	Ankyrin repeat-containing domain
HINDICA_D_3101_Transcript_1/1_m.114254_len:395	IPR002110	Ankyrin repeat
HINDICA_D_3101_Transcript_1/1_m.114254_len:395	IPR020683	Ankyrin repeat-containing domain
HINDICA_D_3101_Transcript_1/1_m.114254_len:395	IPR002110	Ankyrin repeat
HINDICA_D_3101_Transcript_1/1_m.114254_len:395	IPR020683	Ankyrin repeat-containing domain
HINDICA_D_3101_Transcript_1/1_m.114254_len:395	IPR002110	Ankyrin repeat
HINDICA_D_3101_Transcript_1/1_m.114254_len:395	IPR020683	Ankyrin repeat-containing domain
HINDICA_D_3101_Transcript_1/1_m.114254_len:395	IPR002110	Ankyrin repeat
HINDICA_D_2884_Transcript_1/1_m.105264_len:578	IPR001506	Peptidase M12A, astacin
HINDICA_D_2884_Transcript_1/1_m.105264_len:578	IPR024079	Metallopeptidase, catalytic domain
HINDICA_D_2884_Transcript_1/1_m.105264_len:578	IPR006026	Peptidase, metallopeptidase
HINDICA_D_5148_Transcript_4/5_m.81805_len:820	IPR015812	Integrin beta subunit
HINDICA_D_5148_Transcript_4/5_m.81805_len:820	IPR013111	EGF-like domain, extracellular
HINDICA_D_5148_Transcript_4/5_m.81805_len:820	IPR015812	Integrin beta subunit
HINDICA_D_5148_Transcript_4/5_m.81805_len:820	IPR012896	Integrin beta subunit, tail
HINDICA_D_5148_Transcript_4/5_m.81805_len:820	IPR015812	Integrin beta subunit
HINDICA_D_5148_Transcript_4/5_m.81805_len:820	IPR012896	Integrin beta subunit, tail
HINDICA_D_5148_Transcript_4/5_m.81805_len:820	IPR002369	Integrin beta subunit, N-terminal
HINDICA_D_5148_Transcript_4/5_m.81805_len:820	IPR015812	Integrin beta subunit
HINDICA_D_5148_Transcript_4/5_m.81805_len:820	IPR002369	Integrin beta subunit, N-terminal
HINDICA_D_5148_Transcript_4/5_m.81805_len:820	IPR014836	Integrin beta subunit, cytoplasmic domain
HINDICA_D_5148_Transcript_4/5_m.81805_len:820	IPR016201	Plexin-like fold
HINDICA_D_5148_Transcript_4/5_m.81805_len:820	IPR002035	von Willebrand factor, type A
HINDICA_D_5148_Transcript_3/5_m.125984_len:820	IPR015812	Integrin beta subunit
HINDICA_D_5148_Transcript_3/5_m.125984_len:820	IPR013111	EGF-like domain, extracellular
HINDICA_D_5148_Transcript_3/5_m.125984_len:820	IPR015812	Integrin beta subunit
HINDICA_D_5148_Transcript_3/5_m.125984_len:820	IPR012896	Integrin beta subunit, tail
HINDICA_D_5148_Transcript_3/5_m.125984_len:820	IPR015812	Integrin beta subunit
HINDICA_D_5148_Transcript_3/5_m.125984_len:820	IPR012896	Integrin beta subunit, tail
HINDICA_D_5148_Transcript_3/5_m.125984_len:820	IPR002369	Integrin beta subunit, N-terminal
HINDICA_D_5148_Transcript_3/5_m.125984_len:820	IPR015812	Integrin beta subunit
HINDICA_D_5148_Transcript_3/5_m.125984_len:820	IPR002369	Integrin beta subunit, N-terminal
HINDICA_D_5148_Transcript_3/5_m.125984_len:820	IPR014836	Integrin beta subunit, cytoplasmic domain
HINDICA_D_5148_Transcript_3/5_m.125984_len:820	IPR016201	Plexin-like fold
HINDICA_D_5148_Transcript_3/5_m.125984_len:820	IPR002035	von Willebrand factor, type A
HINDICA_D_8361_Transcript_1/2_m.95395_len:129	IPR002200	Elicitin
HINDICA_D_9274_Transcript_2/3_m.81166_len:94	IPR002223	Proteinase inhibitor I2, Kunitz metazoa
HINDICA_D_9274_Transcript_3/3_m.150912_len:94	IPR002223	Proteinase inhibitor I2, Kunitz metazoa
HINDICA_D_6067_Transcript_2/3_m.76169_len:401	IPR005135	Endonuclease/exonuclease/phosphatase
HINDICA_D_10518_Transcript_2/2_m.102790_len:154	IPR007688	Conjugal transfer, TrbL/VirB6
HINDICA_D_3089_Transcript_1/1_m.96755_len:513	IPR005615	Glutathione synthase, eukaryotic
HINDICA_D_3089_Transcript_1/1_m.96755_len:513	IPR013816	ATP-grasp fold, subdomain 2
HINDICA_D_3089_Transcript_1/1_m.96755_len:513	IPR014042	Glutathione synthase, alpha-helical, eukaryotic
HINDICA_D_3089_Transcript_1/1_m.96755_len:513	IPR014709	Glutathione synthase domain
HINDICA_D_3089_Transcript_1/1_m.96755_len:513	IPR005615	Glutathione synthase, eukaryotic
HINDICA_D_3089_Transcript_1/1_m.96755_len:513	IPR004887	Glutathione synthase, substrate-binding, eukaryotic
HINDICA_D_3089_Transcript_1/1_m.96755_len:513	IPR016185	Pre-ATP-grasp domain
HINDICA_D_3089_Transcript_1/1_m.96755_len:513	IPR014049	Glutathione synthase, N-terminal, eukaryotic
HINDICA_D_13098_Transcript_1/1_m.51641_len:399	IPR016024	Armadillo-type fold
HINDICA_D_13098_Transcript_1/1_m.51641_len:399	IPR011989	Armadillo-like helical
HINDICA_D_5878_Transcript_5/5_m.111351_len:323	IPR000742	Epidermal growth factor-like domain
HINDICA_D_5878_Transcript_5/5_m.111351_len:323	IPR013032	EGF-like, conserved site
HINDICA_D_5878_Transcript_5/5_m.111351_len:323	IPR000742	Epidermal growth factor-like domain
HINDICA_D_5878_Transcript_5/5_m.111351_len:323	IPR013032	EGF-like, conserved site
HINDICA_D_670_Transcript_2/3_m.15574_len:424	IPR001313	Pumilio RNA-binding repeat
HINDICA_D_670_Transcript_2/3_m.15574_len:424	IPR011989	Armadillo-like helical
HINDICA_D_670_Transcript_2/3_m.15574_len:424	IPR001313	Pumilio RNA-binding repeat
HINDICA_D_670_Transcript_2/3_m.15574_len:424	IPR016024	Armadillo-type fold
HINDICA_D_670_Transcript_2/3_m.15574_len:424	IPR001313	Pumilio RNA-binding repeat
HINDICA_D_5543_Transcript_1/1_m.125668_len:444	IPR006029	Neurotransmitter-gated ion-channel transmembrane domain
HINDICA_D_5543_Transcript_1/1_m.125668_len:444	IPR006202	Neurotransmitter-gated ion-channel ligand-binding
HINDICA_D_5543_Transcript_1/1_m.125668_len:444	IPR006201	Neurotransmitter-gated ion-channel
HINDICA_D_5543_Transcript_1/1_m.125668_len:444	IPR006202	Neurotransmitter-gated ion-channel ligand-binding
HINDICA_D_5543_Transcript_1/1_m.125668_len:444	IPR027361	Nicotinic acetylcholine-gated receptor, transmembrane domain
HINDICA_D_5543_Transcript_1/1_m.125668_len:444	IPR006029	Neurotransmitter-gated ion-channel transmembrane domain
HINDICA_D_5543_Transcript_1/1_m.125668_len:444	IPR018000	Neurotransmitter-gated ion-channel, conserved site
HINDICA_D_5543_Transcript_1/1_m.125668_len:444	IPR006202	Neurotransmitter-gated ion-channel ligand-binding
HINDICA_D_5543_Transcript_1/1_m.125668_len:444	IPR002394	Nicotinic acetylcholine receptor
HINDICA_D_5543_Transcript_1/1_m.125668_len:444	IPR006201	Neurotransmitter-gated ion-channel
HINDICA_D_8881_Transcript_1/1_m.10798_len:151	IPR000010	Proteinase inhibitor I25, cystatin
HINDICA_D_17108_Transcript_1/1_m.34294_len:211	IPR001166	Crustacean neurohormone
HINDICA_D_1950_Transcript_1/2_m.25824_len:464	IPR011990	Tetratricopeptide-like helical
HINDICA_D_1950_Transcript_1/2_m.25824_len:464	IPR006620	Prolyl 4-hydroxylase, alpha subunit
HINDICA_D_1950_Transcript_1/2_m.25824_len:464	IPR013547	Prolyl 4-hydroxylase alpha-subunit, N-terminal
HINDICA_D_1950_Transcript_1/2_m.25824_len:464	IPR013026	Tetratricopeptide repeat-containing domain
HINDICA_D_4753_Transcript_2/2_m.37871_len:94	IPR016040	NAD(P)-binding domain
HINDICA_D_4753_Transcript_1/2_m.148908_len:94	IPR016040	NAD(P)-binding domain
HINDICA_D_10434_Transcript_2/2_m.24344_len:230	IPR017942	Lipid-binding serum glycoprotein, N-terminal
HINDICA_D_10434_Transcript_2/2_m.24344_len:230	IPR017943	Bactericidal permeability-increasing protein, alpha/beta domain
HINDICA_D_1995_Transcript_1/2_m.52824_len:854	IPR006605	G2 nidogen/fibulin G2F
HINDICA_D_1995_Transcript_1/2_m.52824_len:854	IPR009017	Green fluorescent protein
HINDICA_D_1995_Transcript_1/2_m.52824_len:854	IPR003886	Nidogen, extracellular domain
HINDICA_D_1995_Transcript_1/2_m.52824_len:854	IPR006605	G2 nidogen/fibulin G2F
HINDICA_D_1995_Transcript_1/2_m.52824_len:854	IPR003886	Nidogen, extracellular domain
HINDICA_D_1995_Transcript_1/2_m.52824_len:854	IPR013032	EGF-like, conserved site
HINDICA_D_1995_Transcript_1/2_m.52824_len:854	IPR006605	G2 nidogen/fibulin G2F
HINDICA_D_1995_Transcript_1/2_m.52824_len:854	IPR023413	Green fluorescent protein-like
HINDICA_D_1995_Transcript_1/2_m.52824_len:854	IPR000742	Epidermal growth factor-like domain
HINDICA_D_1995_Transcript_1/2_m.52824_len:854	IPR009030	Insulin-like growth factor binding protein, N-terminal
HINDICA_D_1995_Transcript_1/2_m.52824_len:854	IPR000742	Epidermal growth factor-like domain
HINDICA_D_1995_Transcript_1/2_m.52824_len:854	IPR013032	EGF-like, conserved site
HINDICA_D_1995_Transcript_1/2_m.52824_len:854	IPR000742	Epidermal growth factor-like domain
HINDICA_D_7190_Transcript_2/2_m.159742_len:866	IPR013821	Potassium channel, voltage dependent, KCNQ, C-terminal
HINDICA_D_7190_Transcript_2/2_m.159742_len:866	IPR003937	Potassium channel, voltage dependent, KCNQ
HINDICA_D_7190_Transcript_2/2_m.159742_len:866	IPR003091	Voltage-dependent potassium channel
HINDICA_D_7190_Transcript_2/2_m.159742_len:866	IPR005821	Ion transport domain
HINDICA_D_13897_Transcript_1/2_m.161217_len:453	IPR000668	Peptidase C1A, papain C-terminal
HINDICA_D_13897_Transcript_1/2_m.161217_len:453	IPR025660	Cysteine peptidase, histidine active site
HINDICA_D_13897_Transcript_1/2_m.161217_len:453	IPR000169	Cysteine peptidase, cysteine active site
HINDICA_D_13897_Transcript_1/2_m.161217_len:453	IPR000668	Peptidase C1A, papain C-terminal
HINDICA_D_13897_Transcript_1/2_m.161217_len:453	IPR013201	Proteinase inhibitor I29, cathepsin propeptide
HINDICA_D_13897_Transcript_2/2_m.66395_len:453	IPR000668	Peptidase C1A, papain C-terminal
HINDICA_D_13897_Transcript_2/2_m.66395_len:453	IPR025660	Cysteine peptidase, histidine active site
HINDICA_D_13897_Transcript_2/2_m.66395_len:453	IPR000169	Cysteine peptidase, cysteine active site
HINDICA_D_13897_Transcript_2/2_m.66395_len:453	IPR000668	Peptidase C1A, papain C-terminal
HINDICA_D_13897_Transcript_2/2_m.66395_len:453	IPR013201	Proteinase inhibitor I29, cathepsin propeptide
HINDICA_D_2444_Transcript_1/5_m.105474_len:664	IPR020067	Frizzled domain
HINDICA_D_2444_Transcript_1/5_m.105474_len:664	IPR000539	Frizzled protein
HINDICA_D_2444_Transcript_1/5_m.105474_len:664	IPR020067	Frizzled domain
HINDICA_D_2444_Transcript_1/5_m.105474_len:664	IPR017981	GPCR, family 2-like
HINDICA_D_2444_Transcript_1/5_m.105474_len:664	IPR020067	Frizzled domain
HINDICA_D_2444_Transcript_1/5_m.105474_len:664	IPR000539	Frizzled protein
HINDICA_D_2444_Transcript_5/5_m.156106_len:664	IPR020067	Frizzled domain
HINDICA_D_2444_Transcript_5/5_m.156106_len:664	IPR000539	Frizzled protein
HINDICA_D_2444_Transcript_5/5_m.156106_len:664	IPR020067	Frizzled domain
HINDICA_D_2444_Transcript_5/5_m.156106_len:664	IPR017981	GPCR, family 2-like
HINDICA_D_2444_Transcript_5/5_m.156106_len:664	IPR020067	Frizzled domain
HINDICA_D_2444_Transcript_5/5_m.156106_len:664	IPR000539	Frizzled protein
HINDICA_D_6892_Transcript_1/1_m.130658_len:124	IPR022559	Protein of unknown function DUF2650
HINDICA_D_354_Transcript_2/2_m.1504_len:88	IPR002557	Chitin binding domain
HINDICA_D_5733_Transcript_7/7_m.147196_len:165	IPR024156	Small GTPase superfamily, ARF type
HINDICA_D_5733_Transcript_7/7_m.147196_len:165	IPR027417	P-loop containing nucleoside triphosphate hydrolase
HINDICA_D_5733_Transcript_7/7_m.147196_len:165	IPR005225	Small GTP-binding protein domain
HINDICA_D_5733_Transcript_7/7_m.147196_len:165	IPR006689	Small GTPase superfamily, ARF/SAR type
HINDICA_D_5733_Transcript_7/7_m.147196_len:165	IPR001806	Small GTPase superfamily
HINDICA_D_5733_Transcript_7/7_m.147196_len:165	IPR024156	Small GTPase superfamily, ARF type
HINDICA_D_5836_Transcript_1/1_m.109826_len:416	IPR001356	Homeobox domain
HINDICA_D_5836_Transcript_1/1_m.109826_len:416	IPR009057	Homeodomain-like
HINDICA_D_5836_Transcript_1/1_m.109826_len:416	IPR000047	Helix-turn-helix motif
HINDICA_D_5836_Transcript_1/1_m.109826_len:416	IPR001356	Homeobox domain
HINDICA_D_5836_Transcript_1/1_m.109826_len:416	IPR017970	Homeobox, conserved site
HINDICA_D_5836_Transcript_1/1_m.109826_len:416	IPR020479	Homeodomain, metazoa
HINDICA_D_5793_Transcript_1/1_m.107521_len:1607	IPR005480	Carbamoyl-phosphate synthetase, large subunit oligomerisation domain
HINDICA_D_5793_Transcript_1/1_m.107521_len:1607	IPR005483	Carbamoyl-phosphate synthase large subunit, CPSase domain
HINDICA_D_5793_Transcript_1/1_m.107521_len:1607	IPR017926	Glutamine amidotransferase
HINDICA_D_5793_Transcript_1/1_m.107521_len:1607	IPR016185	Pre-ATP-grasp domain
HINDICA_D_5793_Transcript_1/1_m.107521_len:1607	IPR005479	Carbamoyl-phosphate synthetase large subunit-like, ATP-binding domain
HINDICA_D_5793_Transcript_1/1_m.107521_len:1607	IPR011761	ATP-grasp fold
HINDICA_D_5793_Transcript_1/1_m.107521_len:1607	IPR002474	Carbamoyl-phosphate synthase, small subunit N-terminal domain
HINDICA_D_5793_Transcript_1/1_m.107521_len:1607	IPR006274	Carbamoyl-phosphate synthase, small subunit
HINDICA_D_5793_Transcript_1/1_m.107521_len:1607	IPR005481	Carbamoyl-phosphate synthase, large subunit, N-terminal
HINDICA_D_5793_Transcript_1/1_m.107521_len:1607	IPR005479	Carbamoyl-phosphate synthetase large subunit-like, ATP-binding domain
HINDICA_D_5793_Transcript_1/1_m.107521_len:1607	IPR017926	Glutamine amidotransferase
HINDICA_D_5793_Transcript_1/1_m.107521_len:1607	IPR011761	ATP-grasp fold
HINDICA_D_5793_Transcript_1/1_m.107521_len:1607	IPR005479	Carbamoyl-phosphate synthetase large subunit-like, ATP-binding domain
HINDICA_D_5793_Transcript_1/1_m.107521_len:1607	IPR006275	Carbamoyl-phosphate synthase, large subunit
HINDICA_D_5793_Transcript_1/1_m.107521_len:1607	IPR005480	Carbamoyl-phosphate synthetase, large subunit oligomerisation domain
HINDICA_D_5793_Transcript_1/1_m.107521_len:1607	IPR016185	Pre-ATP-grasp domain
HINDICA_D_5793_Transcript_1/1_m.107521_len:1607	IPR002474	Carbamoyl-phosphate synthase, small subunit N-terminal domain
HINDICA_D_5793_Transcript_1/1_m.107521_len:1607	IPR006274	Carbamoyl-phosphate synthase, small subunit
HINDICA_D_5793_Transcript_1/1_m.107521_len:1607	IPR011607	Methylglyoxal synthase-like domain
HINDICA_D_5793_Transcript_1/1_m.107521_len:1607	IPR013815	ATP-grasp fold, subdomain 1
HINDICA_D_5793_Transcript_1/1_m.107521_len:1607	IPR013816	ATP-grasp fold, subdomain 2
HINDICA_D_5793_Transcript_1/1_m.107521_len:1607	IPR011607	Methylglyoxal synthase-like domain
HINDICA_D_5793_Transcript_1/1_m.107521_len:1607	IPR002474	Carbamoyl-phosphate synthase, small subunit N-terminal domain
HINDICA_D_5793_Transcript_1/1_m.107521_len:1607	IPR005480	Carbamoyl-phosphate synthetase, large subunit oligomerisation domain
HINDICA_D_5793_Transcript_1/1_m.107521_len:1607	IPR016185	Pre-ATP-grasp domain
HINDICA_D_5793_Transcript_1/1_m.107521_len:1607	IPR011607	Methylglyoxal synthase-like domain
HINDICA_D_5793_Transcript_1/1_m.107521_len:1607	IPR005479	Carbamoyl-phosphate synthetase large subunit-like, ATP-binding domain
HINDICA_D_7827_Transcript_1/1_m.18988_len:183	IPR028146	Glucosidase II beta subunit, N-terminal
HINDICA_D_7827_Transcript_1/1_m.18988_len:183	IPR002172	Low-density lipoprotein (LDL) receptor class A repeat
HINDICA_D_11257_Transcript_1/1_m.87002_len:596	IPR011038	Calycin-like
HINDICA_D_11257_Transcript_1/1_m.87002_len:596	IPR012674	Calycin
HINDICA_D_6814_Transcript_1/1_m.51893_len:263	IPR002919	Trypsin Inhibitor-like, cysteine rich domain
HINDICA_D_15072_Transcript_1/2_m.146424_len:202	IPR018247	EF-Hand 1, calcium-binding site
HINDICA_D_15072_Transcript_1/2_m.146424_len:202	IPR011992	EF-hand domain pair
HINDICA_D_15072_Transcript_1/2_m.146424_len:202	IPR018247	EF-Hand 1, calcium-binding site
HINDICA_D_15072_Transcript_1/2_m.146424_len:202	IPR002048	EF-hand domain
HINDICA_D_15072_Transcript_1/2_m.146424_len:202	IPR011992	EF-hand domain pair
HINDICA_D_15072_Transcript_1/2_m.146424_len:202	IPR002048	EF-hand domain
HINDICA_D_15072_Transcript_1/2_m.146424_len:202	IPR018247	EF-Hand 1, calcium-binding site
HINDICA_D_3139_Transcript_1/3_m.91433_len:133	IPR002544	FMRFamide-related peptide-like
HINDICA_D_3139_Transcript_2/3_m.157003_len:133	IPR002544	FMRFamide-related peptide-like
HINDICA_D_2038_Transcript_1/2_m.114673_len:592	IPR006539	Phospholipid-transporting P-type ATPase, subfamily IV
HINDICA_D_2038_Transcript_1/2_m.114673_len:592	IPR023299	P-type ATPase, cytoplasmic domain N
HINDICA_D_2038_Transcript_1/2_m.114673_len:592	IPR008250	P-type ATPase, A domain
HINDICA_D_2038_Transcript_1/2_m.114673_len:592	IPR018303	P-type ATPase, phosphorylation site
HINDICA_D_2038_Transcript_1/2_m.114673_len:592	IPR008250	P-type ATPase, A domain
HINDICA_D_2038_Transcript_1/2_m.114673_len:592	IPR023299	P-type ATPase, cytoplasmic domain N
HINDICA_D_8694_Transcript_3/3_m.121391_len:542	IPR005052	Legume-like lectin
HINDICA_D_8694_Transcript_3/3_m.121391_len:542	IPR008985	Concanavalin A-like lectin/glucanases superfamily
HINDICA_D_8694_Transcript_3/3_m.121391_len:542	IPR013320	Concanavalin A-like lectin/glucanase, subgroup
HINDICA_D_8694_Transcript_3/3_m.121391_len:542	IPR005052	Legume-like lectin
HINDICA_D_5080_Transcript_1/3_m.170011_len:198	IPR027417	P-loop containing nucleoside triphosphate hydrolase
HINDICA_D_5080_Transcript_1/3_m.170011_len:198	IPR001806	Small GTPase superfamily
HINDICA_D_5080_Transcript_1/3_m.170011_len:198	IPR020849	Small GTPase superfamily, Ras type
HINDICA_D_5080_Transcript_1/3_m.170011_len:198	IPR005225	Small GTP-binding protein domain
HINDICA_D_5080_Transcript_1/3_m.170011_len:198	IPR003578	Small GTPase superfamily, Rho type
HINDICA_D_5080_Transcript_1/3_m.170011_len:198	IPR001806	Small GTPase superfamily
HINDICA_D_5080_Transcript_1/3_m.170011_len:198	IPR003579	Small GTPase superfamily, Rab type
HINDICA_D_5080_Transcript_3/3_m.153863_len:198	IPR027417	P-loop containing nucleoside triphosphate hydrolase
HINDICA_D_5080_Transcript_3/3_m.153863_len:198	IPR001806	Small GTPase superfamily
HINDICA_D_5080_Transcript_3/3_m.153863_len:198	IPR020849	Small GTPase superfamily, Ras type
HINDICA_D_5080_Transcript_3/3_m.153863_len:198	IPR005225	Small GTP-binding protein domain
HINDICA_D_5080_Transcript_3/3_m.153863_len:198	IPR003578	Small GTPase superfamily, Rho type
HINDICA_D_5080_Transcript_3/3_m.153863_len:198	IPR001806	Small GTPase superfamily
HINDICA_D_5080_Transcript_3/3_m.153863_len:198	IPR003579	Small GTPase superfamily, Rab type
HINDICA_D_4094_Transcript_4/4_m.76145_len:204	IPR008952	Tetraspanin, EC2 domain
HINDICA_D_4094_Transcript_4/4_m.76145_len:204	IPR018499	Tetraspanin/Peripherin
HINDICA_D_1232_Transcript_1/1_m.8380_len:243	IPR004240	Nonaspanin (TM9SF)
HINDICA_D_14847_Transcript_1/1_m.5217_len:191	IPR009038	GOLD
HINDICA_D_697_Transcript_4/4_m.172127_len:497	IPR004836	Sodium/calcium exchanger protein
HINDICA_D_697_Transcript_4/4_m.172127_len:497	IPR004837	Sodium/calcium exchanger membrane region
HINDICA_D_697_Transcript_4/4_m.172127_len:497	IPR003644	Na-Ca exchanger/integrin-beta4
HINDICA_D_10077_Transcript_1/1_m.26346_len:457	IPR000719	Protein kinase domain
HINDICA_D_10077_Transcript_1/1_m.26346_len:457	IPR011009	Protein kinase-like domain
HINDICA_D_10077_Transcript_1/1_m.26346_len:457	IPR020635	Tyrosine-protein kinase, catalytic domain
HINDICA_D_10077_Transcript_1/1_m.26346_len:457	IPR001245	Serine-threonine/tyrosine-protein kinase catalytic domain
HINDICA_D_10077_Transcript_1/1_m.26346_len:457	IPR017441	Protein kinase, ATP binding site
HINDICA_D_10077_Transcript_1/1_m.26346_len:457	IPR008266	Tyrosine-protein kinase, active site
HINDICA_D_10077_Transcript_1/1_m.26346_len:457	IPR001245	Serine-threonine/tyrosine-protein kinase catalytic domain
HINDICA_D_2515_Transcript_2/2_m.32732_len:774	IPR003582	Metridin-like ShK toxin
HINDICA_D_2515_Transcript_2/2_m.32732_len:774	IPR002227	Tyrosinase
HINDICA_D_2515_Transcript_2/2_m.32732_len:774	IPR003582	Metridin-like ShK toxin
HINDICA_D_2515_Transcript_2/2_m.32732_len:774	IPR002227	Tyrosinase
HINDICA_D_2515_Transcript_2/2_m.32732_len:774	IPR008922	Uncharacterised domain, di-copper centre
HINDICA_D_2515_Transcript_2/2_m.32732_len:774	IPR002227	Tyrosinase
HINDICA_D_2515_Transcript_2/2_m.32732_len:774	IPR008922	Uncharacterised domain, di-copper centre
HINDICA_D_2515_Transcript_2/2_m.32732_len:774	IPR002227	Tyrosinase
HINDICA_D_7391_Transcript_1/2_m.152609_len:137	IPR018247	EF-Hand 1, calcium-binding site
HINDICA_D_7391_Transcript_1/2_m.152609_len:137	IPR011992	EF-hand domain pair
HINDICA_D_7391_Transcript_1/2_m.152609_len:137	IPR002048	EF-hand domain
HINDICA_D_7391_Transcript_1/2_m.152609_len:137	IPR011992	EF-hand domain pair
HINDICA_D_7391_Transcript_1/2_m.152609_len:137	IPR018247	EF-Hand 1, calcium-binding site
HINDICA_D_7391_Transcript_1/2_m.152609_len:137	IPR002048	EF-hand domain
HINDICA_D_137_Transcript_1/1_m.27386_len:816	IPR024079	Metallopeptidase, catalytic domain
HINDICA_D_137_Transcript_1/1_m.27386_len:816	IPR018497	Peptidase M13, C-terminal domain
HINDICA_D_137_Transcript_1/1_m.27386_len:816	IPR008753	Peptidase M13, N-terminal domain
HINDICA_D_137_Transcript_1/1_m.27386_len:816	IPR018497	Peptidase M13, C-terminal domain
HINDICA_D_16354_Transcript_1/1_m.69895_len:70	IPR009100	Acyl-CoA dehydrogenase/oxidase
HINDICA_D_16354_Transcript_1/1_m.69895_len:70	IPR006091	Acyl-CoA oxidase/dehydrogenase, central domain
HINDICA_D_16354_Transcript_1/1_m.69895_len:70	IPR013786	Acyl-CoA dehydrogenase/oxidase, N-terminal
HINDICA_D_16354_Transcript_1/1_m.69895_len:70	IPR006089	Acyl-CoA dehydrogenase, conserved site
HINDICA_D_16354_Transcript_1/1_m.69895_len:70	IPR006091	Acyl-CoA oxidase/dehydrogenase, central domain
HINDICA_D_16189_Transcript_2/2_m.81753_len:187	IPR014756	Immunoglobulin E-set
HINDICA_D_16189_Transcript_2/2_m.81753_len:187	IPR003172	MD-2-related lipid-recognition domain
HINDICA_D_15380_Transcript_1/1_m.120870_len:779	IPR000859	CUB domain
HINDICA_D_15380_Transcript_1/1_m.120870_len:779	IPR024079	Metallopeptidase, catalytic domain
HINDICA_D_15380_Transcript_1/1_m.120870_len:779	IPR001506	Peptidase M12A, astacin
HINDICA_D_15380_Transcript_1/1_m.120870_len:779	IPR006026	Peptidase, metallopeptidase
HINDICA_D_15380_Transcript_1/1_m.120870_len:779	IPR013032	EGF-like, conserved site
HINDICA_D_15380_Transcript_1/1_m.120870_len:779	IPR000859	CUB domain
HINDICA_D_15380_Transcript_1/1_m.120870_len:779	IPR013032	EGF-like, conserved site
HINDICA_D_14580_Transcript_1/1_m.75955_len:631	IPR001723	Steroid hormone receptor
HINDICA_D_14580_Transcript_1/1_m.75955_len:631	IPR000536	Nuclear hormone receptor, ligand-binding, core
HINDICA_D_14580_Transcript_1/1_m.75955_len:631	IPR008946	Nuclear hormone receptor, ligand-binding
HINDICA_D_14580_Transcript_1/1_m.75955_len:631	IPR001628	Zinc finger, nuclear hormone receptor-type
HINDICA_D_14580_Transcript_1/1_m.75955_len:631	IPR008946	Nuclear hormone receptor, ligand-binding
HINDICA_D_14580_Transcript_1/1_m.75955_len:631	IPR001628	Zinc finger, nuclear hormone receptor-type
HINDICA_D_14580_Transcript_1/1_m.75955_len:631	IPR008946	Nuclear hormone receptor, ligand-binding
HINDICA_D_14580_Transcript_1/1_m.75955_len:631	IPR013088	Zinc finger, NHR/GATA-type
HINDICA_D_14580_Transcript_1/1_m.75955_len:631	IPR001628	Zinc finger, nuclear hormone receptor-type
HINDICA_D_14580_Transcript_1/1_m.75955_len:631	IPR000536	Nuclear hormone receptor, ligand-binding, core
HINDICA_D_13028_Transcript_1/1_m.29757_len:156	IPR002119	Histone H2A
HINDICA_D_13028_Transcript_1/1_m.29757_len:156	IPR009072	Histone-fold
HINDICA_D_13028_Transcript_1/1_m.29757_len:156	IPR002119	Histone H2A
HINDICA_D_13028_Transcript_1/1_m.29757_len:156	IPR007125	Histone core
HINDICA_D_6993_Transcript_1/1_m.97140_len:622	IPR006202	Neurotransmitter-gated ion-channel ligand-binding
HINDICA_D_6993_Transcript_1/1_m.97140_len:622	IPR006029	Neurotransmitter-gated ion-channel transmembrane domain
HINDICA_D_6993_Transcript_1/1_m.97140_len:622	IPR006202	Neurotransmitter-gated ion-channel ligand-binding
HINDICA_D_6993_Transcript_1/1_m.97140_len:622	IPR002394	Nicotinic acetylcholine receptor
HINDICA_D_6993_Transcript_1/1_m.97140_len:622	IPR006201	Neurotransmitter-gated ion-channel
HINDICA_D_6993_Transcript_1/1_m.97140_len:622	IPR006202	Neurotransmitter-gated ion-channel ligand-binding
HINDICA_D_6993_Transcript_1/1_m.97140_len:622	IPR006029	Neurotransmitter-gated ion-channel transmembrane domain
HINDICA_D_6993_Transcript_1/1_m.97140_len:622	IPR018000	Neurotransmitter-gated ion-channel, conserved site
HINDICA_D_6993_Transcript_1/1_m.97140_len:622	IPR027361	Nicotinic acetylcholine-gated receptor, transmembrane domain
HINDICA_D_14217_Transcript_1/1_m.43839_len:159	IPR004443	YjeF N-terminal domain
HINDICA_D_2412_Transcript_1/4_m.152378_len:535	IPR003582	Metridin-like ShK toxin
HINDICA_D_2412_Transcript_1/4_m.152378_len:535	IPR002227	Tyrosinase
HINDICA_D_2412_Transcript_1/4_m.152378_len:535	IPR003582	Metridin-like ShK toxin
HINDICA_D_2412_Transcript_1/4_m.152378_len:535	IPR008922	Uncharacterised domain, di-copper centre
HINDICA_D_2412_Transcript_1/4_m.152378_len:535	IPR002227	Tyrosinase
HINDICA_D_2412_Transcript_1/4_m.152378_len:535	IPR008922	Uncharacterised domain, di-copper centre
HINDICA_D_2412_Transcript_1/4_m.152378_len:535	IPR002227	Tyrosinase
HINDICA_D_10560_Transcript_1/1_m.50774_len:297	IPR008979	Galactose-binding domain-like
HINDICA_D_10560_Transcript_1/1_m.50774_len:297	IPR012919	Sad1/UNC-like, C-terminal
HINDICA_D_10886_Transcript_2/2_m.109586_len:404	IPR012674	Calycin
HINDICA_D_10886_Transcript_2/2_m.109586_len:404	IPR011038	Calycin-like
HINDICA_D_6295_Transcript_1/2_m.103977_len:127	IPR002200	Elicitin
HINDICA_D_6712_Transcript_2/2_m.114777_len:141	IPR022559	Protein of unknown function DUF2650
HINDICA_D_12190_Transcript_1/1_m.130951_len:620	IPR012336	Thioredoxin-like fold
HINDICA_D_12190_Transcript_1/1_m.130951_len:620	IPR017905	ERV/ALR sulphydryl oxidase
HINDICA_D_12190_Transcript_1/1_m.130951_len:620	IPR006863	Erv1/Alr
HINDICA_D_12190_Transcript_1/1_m.130951_len:620	IPR012336	Thioredoxin-like fold
HINDICA_D_12190_Transcript_1/1_m.130951_len:620	IPR006863	Erv1/Alr
HINDICA_D_12190_Transcript_1/1_m.130951_len:620	IPR017937	Thioredoxin, conserved site
HINDICA_D_12190_Transcript_1/1_m.130951_len:620	IPR013766	Thioredoxin domain
HINDICA_D_12190_Transcript_1/1_m.130951_len:620	IPR006863	Erv1/Alr
HINDICA_D_12190_Transcript_1/1_m.130951_len:620	IPR012336	Thioredoxin-like fold
HINDICA_D_8078_Transcript_1/1_m.87322_len:90	IPR017969	Heavy-metal-associated, conserved site
HINDICA_D_8078_Transcript_1/1_m.87322_len:90	IPR006121	Heavy metal-associated domain, HMA
HINDICA_D_16045_Transcript_1/1_m.89638_len:485	IPR004843	Phosphoesterase domain
HINDICA_D_3813_Transcript_1/1_m.63704_len:767	IPR009030	Insulin-like growth factor binding protein, N-terminal
HINDICA_D_3813_Transcript_1/1_m.63704_len:767	IPR000494	EGF receptor, L domain
HINDICA_D_3813_Transcript_1/1_m.63704_len:767	IPR017896	4Fe-4S ferredoxin-type, iron-sulpur binding domain
HINDICA_D_3813_Transcript_1/1_m.63704_len:767	IPR013783	Immunoglobulin-like fold
HINDICA_D_3813_Transcript_1/1_m.63704_len:767	IPR006211	Furin-like cysteine-rich domain
HINDICA_D_3813_Transcript_1/1_m.63704_len:767	IPR000494	EGF receptor, L domain
HINDICA_D_3813_Transcript_1/1_m.63704_len:767	IPR003961	Fibronectin, type III
HINDICA_D_3813_Transcript_1/1_m.63704_len:767	IPR013783	Immunoglobulin-like fold
HINDICA_D_2939_Transcript_2/3_m.160980_len:1575	IPR015943	WD40/YVTN repeat-like-containing domain
HINDICA_D_2939_Transcript_2/3_m.160980_len:1575	IPR011989	Armadillo-like helical
HINDICA_D_2939_Transcript_2/3_m.160980_len:1575	IPR017986	WD40-repeat-containing domain
HINDICA_D_2939_Transcript_2/3_m.160980_len:1575	IPR016024	Armadillo-type fold
HINDICA_D_2939_Transcript_2/3_m.160980_len:1575	IPR004083	Regulatory associated protein of TOR
HINDICA_D_2939_Transcript_3/3_m.165199_len:1575	IPR015943	WD40/YVTN repeat-like-containing domain
HINDICA_D_2939_Transcript_3/3_m.165199_len:1575	IPR011989	Armadillo-like helical
HINDICA_D_2939_Transcript_3/3_m.165199_len:1575	IPR017986	WD40-repeat-containing domain
HINDICA_D_2939_Transcript_3/3_m.165199_len:1575	IPR016024	Armadillo-type fold
HINDICA_D_2939_Transcript_3/3_m.165199_len:1575	IPR004083	Regulatory associated protein of TOR
HINDICA_D_7622_Transcript_1/3_m.142824_len:978	IPR001627	Sema domain
HINDICA_D_7622_Transcript_1/3_m.142824_len:978	IPR016201	Plexin-like fold
HINDICA_D_7622_Transcript_1/3_m.142824_len:978	IPR001627	Sema domain
HINDICA_D_7622_Transcript_1/3_m.142824_len:978	IPR002165	Plexin
HINDICA_D_7622_Transcript_1/3_m.142824_len:978	IPR001627	Sema domain
HINDICA_D_7622_Transcript_1/3_m.142824_len:978	IPR015943	WD40/YVTN repeat-like-containing domain
HINDICA_D_12663_Transcript_1/2_m.89657_len:687	IPR002227	Tyrosinase
HINDICA_D_12663_Transcript_1/2_m.89657_len:687	IPR008922	Uncharacterised domain, di-copper centre
HINDICA_D_12663_Transcript_1/2_m.89657_len:687	IPR002227	Tyrosinase
HINDICA_D_12663_Transcript_1/2_m.89657_len:687	IPR008922	Uncharacterised domain, di-copper centre
HINDICA_D_12663_Transcript_1/2_m.89657_len:687	IPR002227	Tyrosinase
HINDICA_D_2236_Transcript_4/4_m.113928_len:1370	IPR003886	Nidogen, extracellular domain
HINDICA_D_2236_Transcript_4/4_m.113928_len:1370	IPR001881	EGF-like calcium-binding domain
HINDICA_D_2236_Transcript_4/4_m.113928_len:1370	IPR003886	Nidogen, extracellular domain
HINDICA_D_2236_Transcript_4/4_m.113928_len:1370	IPR000152	EGF-type aspartate/asparagine hydroxylation site
HINDICA_D_2236_Transcript_4/4_m.113928_len:1370	IPR018097	EGF-like calcium-binding, conserved site
HINDICA_D_2236_Transcript_4/4_m.113928_len:1370	IPR003886	Nidogen, extracellular domain
HINDICA_D_2236_Transcript_4/4_m.113928_len:1370	IPR000742	Epidermal growth factor-like domain
HINDICA_D_2236_Transcript_4/4_m.113928_len:1370	IPR001881	EGF-like calcium-binding domain
HINDICA_D_2236_Transcript_4/4_m.113928_len:1370	IPR003886	Nidogen, extracellular domain
HINDICA_D_7504_Transcript_1/1_m.57179_len:196	IPR002048	EF-hand domain
HINDICA_D_7504_Transcript_1/1_m.57179_len:196	IPR011992	EF-hand domain pair
HINDICA_D_7504_Transcript_1/1_m.57179_len:196	IPR018247	EF-Hand 1, calcium-binding site
HINDICA_D_11990_Transcript_1/1_m.6778_len:147	IPR016093	MIR motif
HINDICA_D_14543_Transcript_1/1_m.87618_len:113	IPR001283	Allergen V5/Tpx-1-related
HINDICA_D_14543_Transcript_1/1_m.87618_len:113	IPR014044	CAP domain
HINDICA_D_5878_Transcript_2/5_m.122125_len:480	IPR000742	Epidermal growth factor-like domain
HINDICA_D_5878_Transcript_2/5_m.122125_len:480	IPR013032	EGF-like, conserved site
HINDICA_D_5878_Transcript_2/5_m.122125_len:480	IPR000742	Epidermal growth factor-like domain
HINDICA_D_5878_Transcript_2/5_m.122125_len:480	IPR013032	EGF-like, conserved site
HINDICA_D_5878_Transcript_2/5_m.122125_len:480	IPR000742	Epidermal growth factor-like domain
HINDICA_D_5878_Transcript_2/5_m.122125_len:480	IPR013032	EGF-like, conserved site
HINDICA_D_5878_Transcript_2/5_m.122125_len:480	IPR000742	Epidermal growth factor-like domain
HINDICA_D_5878_Transcript_2/5_m.122125_len:480	IPR013032	EGF-like, conserved site
HINDICA_D_6571_Transcript_1/1_m.119666_len:268	IPR001304	C-type lectin
HINDICA_D_6571_Transcript_1/1_m.119666_len:268	IPR018378	C-type lectin, conserved site
HINDICA_D_6571_Transcript_1/1_m.119666_len:268	IPR001304	C-type lectin
HINDICA_D_6571_Transcript_1/1_m.119666_len:268	IPR016187	C-type lectin fold
HINDICA_D_6571_Transcript_1/1_m.119666_len:268	IPR016186	C-type lectin-like
HINDICA_D_15529_Transcript_1/2_m.34943_len:214	IPR005804	Fatty acid desaturase, type 1
HINDICA_D_3590_Transcript_1/1_m.28180_len:498	IPR015943	WD40/YVTN repeat-like-containing domain
HINDICA_D_3590_Transcript_1/1_m.28180_len:498	IPR001680	WD40 repeat
HINDICA_D_3590_Transcript_1/1_m.28180_len:498	IPR006692	Coatomer, WD associated region
HINDICA_D_3590_Transcript_1/1_m.28180_len:498	IPR001680	WD40 repeat
HINDICA_D_3590_Transcript_1/1_m.28180_len:498	IPR019775	WD40 repeat, conserved site
HINDICA_D_3590_Transcript_1/1_m.28180_len:498	IPR001680	WD40 repeat
HINDICA_D_3590_Transcript_1/1_m.28180_len:498	IPR017986	WD40-repeat-containing domain
HINDICA_D_3590_Transcript_1/1_m.28180_len:498	IPR020472	G-protein beta WD-40 repeat
HINDICA_D_8694_Transcript_2/3_m.153403_len:543	IPR005052	Legume-like lectin
HINDICA_D_8694_Transcript_2/3_m.153403_len:543	IPR008985	Concanavalin A-like lectin/glucanases superfamily
HINDICA_D_8694_Transcript_2/3_m.153403_len:543	IPR013320	Concanavalin A-like lectin/glucanase, subgroup
HINDICA_D_8694_Transcript_2/3_m.153403_len:543	IPR005052	Legume-like lectin
HINDICA_D_6749_Transcript_2/2_m.156474_len:184	IPR002544	FMRFamide-related peptide-like
HINDICA_D_6079_Transcript_2/3_m.140810_len:365	IPR001254	Peptidase S1
HINDICA_D_6079_Transcript_2/3_m.140810_len:365	IPR009003	Trypsin-like cysteine/serine peptidase domain
HINDICA_D_7866_Transcript_1/3_m.119290_len:287	IPR002110	Ankyrin repeat
HINDICA_D_7866_Transcript_1/3_m.119290_len:287	IPR020683	Ankyrin repeat-containing domain
HINDICA_D_7866_Transcript_1/3_m.119290_len:287	IPR002110	Ankyrin repeat
HINDICA_D_7866_Transcript_1/3_m.119290_len:287	IPR020683	Ankyrin repeat-containing domain
HINDICA_D_7866_Transcript_1/3_m.119290_len:287	IPR002110	Ankyrin repeat
HINDICA_D_7866_Transcript_1/3_m.119290_len:287	IPR020683	Ankyrin repeat-containing domain
HINDICA_D_7866_Transcript_1/3_m.119290_len:287	IPR002110	Ankyrin repeat
HINDICA_D_7866_Transcript_1/3_m.119290_len:287	IPR020683	Ankyrin repeat-containing domain
HINDICA_D_11421_Transcript_2/2_m.165694_len:367	IPR007110	Immunoglobulin-like domain
HINDICA_D_11421_Transcript_2/2_m.165694_len:367	IPR003599	Immunoglobulin subtype
HINDICA_D_11421_Transcript_2/2_m.165694_len:367	IPR013098	Immunoglobulin I-set
HINDICA_D_11421_Transcript_2/2_m.165694_len:367	IPR007110	Immunoglobulin-like domain
HINDICA_D_11421_Transcript_2/2_m.165694_len:367	IPR003598	Immunoglobulin subtype 2
HINDICA_D_11421_Transcript_2/2_m.165694_len:367	IPR013783	Immunoglobulin-like fold
HINDICA_D_4771_Transcript_1/1_m.114202_len:679	IPR025875	Leucine rich repeat 4
HINDICA_D_4771_Transcript_1/1_m.114202_len:679	IPR001611	Leucine-rich repeat
HINDICA_D_4771_Transcript_1/1_m.114202_len:679	IPR000483	Cysteine-rich flanking region, C-terminal
HINDICA_D_4771_Transcript_1/1_m.114202_len:679	IPR001611	Leucine-rich repeat
HINDICA_D_4771_Transcript_1/1_m.114202_len:679	IPR003591	Leucine-rich repeat, typical subtype
HINDICA_D_4771_Transcript_1/1_m.114202_len:679	IPR001611	Leucine-rich repeat
HINDICA_D_6184_Transcript_1/1_m.95953_len:217	IPR002602	Domain of unknown function DB
HINDICA_D_5124_Transcript_2/2_m.58168_len:328	IPR010044	Methylthioadenosine phosphorylase (MTAP)
HINDICA_D_5124_Transcript_2/2_m.58168_len:328	IPR000845	Nucleoside phosphorylase domain
HINDICA_D_5124_Transcript_2/2_m.58168_len:328	IPR010044	Methylthioadenosine phosphorylase (MTAP)
HINDICA_D_5124_Transcript_2/2_m.58168_len:328	IPR000845	Nucleoside phosphorylase domain
HINDICA_D_2236_Transcript_2/4_m.141077_len:1370	IPR003886	Nidogen, extracellular domain
HINDICA_D_2236_Transcript_2/4_m.141077_len:1370	IPR001881	EGF-like calcium-binding domain
HINDICA_D_2236_Transcript_2/4_m.141077_len:1370	IPR003886	Nidogen, extracellular domain
HINDICA_D_2236_Transcript_2/4_m.141077_len:1370	IPR000152	EGF-type aspartate/asparagine hydroxylation site
HINDICA_D_2236_Transcript_2/4_m.141077_len:1370	IPR018097	EGF-like calcium-binding, conserved site
HINDICA_D_2236_Transcript_2/4_m.141077_len:1370	IPR003886	Nidogen, extracellular domain
HINDICA_D_2236_Transcript_2/4_m.141077_len:1370	IPR000742	Epidermal growth factor-like domain
HINDICA_D_2236_Transcript_2/4_m.141077_len:1370	IPR001881	EGF-like calcium-binding domain
HINDICA_D_2236_Transcript_2/4_m.141077_len:1370	IPR003886	Nidogen, extracellular domain
HINDICA_D_9215_Transcript_1/1_m.138324_len:506	IPR005615	Glutathione synthase, eukaryotic
HINDICA_D_9215_Transcript_1/1_m.138324_len:506	IPR014042	Glutathione synthase, alpha-helical, eukaryotic
HINDICA_D_9215_Transcript_1/1_m.138324_len:506	IPR014709	Glutathione synthase domain
HINDICA_D_9215_Transcript_1/1_m.138324_len:506	IPR005615	Glutathione synthase, eukaryotic
HINDICA_D_9215_Transcript_1/1_m.138324_len:506	IPR016185	Pre-ATP-grasp domain
HINDICA_D_9215_Transcript_1/1_m.138324_len:506	IPR014049	Glutathione synthase, N-terminal, eukaryotic
HINDICA_D_9215_Transcript_1/1_m.138324_len:506	IPR004887	Glutathione synthase, substrate-binding, eukaryotic
HINDICA_D_9215_Transcript_1/1_m.138324_len:506	IPR005615	Glutathione synthase, eukaryotic
HINDICA_D_11295_Transcript_1/1_m.115772_len:515	IPR002213	UDP-glucuronosyl/UDP-glucosyltransferase
HINDICA_D_8004_Transcript_1/1_m.128470_len:589	IPR004887	Glutathione synthase, substrate-binding, eukaryotic
HINDICA_D_8004_Transcript_1/1_m.128470_len:589	IPR014042	Glutathione synthase, alpha-helical, eukaryotic
HINDICA_D_8004_Transcript_1/1_m.128470_len:589	IPR004887	Glutathione synthase, substrate-binding, eukaryotic
HINDICA_D_8004_Transcript_1/1_m.128470_len:589	IPR014049	Glutathione synthase, N-terminal, eukaryotic
HINDICA_D_8004_Transcript_1/1_m.128470_len:589	IPR005615	Glutathione synthase, eukaryotic
HINDICA_D_8004_Transcript_1/1_m.128470_len:589	IPR016185	Pre-ATP-grasp domain
HINDICA_D_8004_Transcript_1/1_m.128470_len:589	IPR014709	Glutathione synthase domain
HINDICA_D_8004_Transcript_1/1_m.128470_len:589	IPR013816	ATP-grasp fold, subdomain 2
HINDICA_D_3429_Transcript_1/1_m.25529_len:633	IPR013126	Heat shock protein 70 family
HINDICA_D_3853_Transcript_3/4_m.161251_len:531	IPR000719	Protein kinase domain
HINDICA_D_3853_Transcript_3/4_m.161251_len:531	IPR017441	Protein kinase, ATP binding site
HINDICA_D_3853_Transcript_3/4_m.161251_len:531	IPR000719	Protein kinase domain
HINDICA_D_3853_Transcript_3/4_m.161251_len:531	IPR008271	Serine/threonine-protein kinase, active site
HINDICA_D_3853_Transcript_3/4_m.161251_len:531	IPR011009	Protein kinase-like domain
HINDICA_D_3853_Transcript_3/4_m.161251_len:531	IPR002290	Serine/threonine- / dual specificity protein kinase, catalytic domain
HINDICA_D_697_Transcript_2/4_m.146755_len:973	IPR004837	Sodium/calcium exchanger membrane region
HINDICA_D_697_Transcript_2/4_m.146755_len:973	IPR004836	Sodium/calcium exchanger protein
HINDICA_D_697_Transcript_2/4_m.146755_len:973	IPR003644	Na-Ca exchanger/integrin-beta4
HINDICA_D_8660_Transcript_1/1_m.14911_len:156	IPR001534	Transthyretin-like
HINDICA_D_10490_Transcript_1/1_m.13494_len:342	IPR003954	RNA recognition motif domain, eukaryote
HINDICA_D_10490_Transcript_1/1_m.13494_len:342	IPR000504	RNA recognition motif domain
HINDICA_D_10490_Transcript_1/1_m.13494_len:342	IPR012677	Nucleotide-binding, alpha-beta plait
HINDICA_D_10490_Transcript_1/1_m.13494_len:342	IPR000504	RNA recognition motif domain
HINDICA_D_10490_Transcript_1/1_m.13494_len:342	IPR012677	Nucleotide-binding, alpha-beta plait
HINDICA_D_10490_Transcript_1/1_m.13494_len:342	IPR000504	RNA recognition motif domain
HINDICA_D_3059_Transcript_1/5_m.166862_len:743	IPR001650	Helicase, C-terminal
HINDICA_D_3059_Transcript_1/5_m.166862_len:743	IPR027417	P-loop containing nucleoside triphosphate hydrolase
HINDICA_D_3059_Transcript_1/5_m.166862_len:743	IPR001650	Helicase, C-terminal
HINDICA_D_3059_Transcript_1/5_m.166862_len:743	IPR000330	SNF2-related
HINDICA_D_3059_Transcript_1/5_m.166862_len:743	IPR014001	Helicase, superfamily 1/2, ATP-binding domain
HINDICA_D_3059_Transcript_1/5_m.166862_len:743	IPR027417	P-loop containing nucleoside triphosphate hydrolase
HINDICA_D_3059_Transcript_1/5_m.166862_len:743	IPR014001	Helicase, superfamily 1/2, ATP-binding domain
HINDICA_D_3059_Transcript_1/5_m.166862_len:743	IPR021133	HEAT, type 2
HINDICA_D_7747_Transcript_1/1_m.129236_len:379	IPR000980	SH2 domain
HINDICA_D_7747_Transcript_1/1_m.129236_len:379	IPR011009	Protein kinase-like domain
HINDICA_D_7747_Transcript_1/1_m.129236_len:379	IPR000980	SH2 domain
HINDICA_D_7747_Transcript_1/1_m.129236_len:379	IPR000719	Protein kinase domain
HINDICA_D_7747_Transcript_1/1_m.129236_len:379	IPR001245	Serine-threonine/tyrosine-protein kinase catalytic domain
HINDICA_D_7747_Transcript_1/1_m.129236_len:379	IPR000980	SH2 domain
HINDICA_D_14280_Transcript_1/1_m.15184_len:446	IPR001611	Leucine-rich repeat
HINDICA_D_14280_Transcript_1/1_m.15184_len:446	IPR003591	Leucine-rich repeat, typical subtype
HINDICA_D_14280_Transcript_1/1_m.15184_len:446	IPR001611	Leucine-rich repeat
HINDICA_D_15115_Transcript_1/1_m.48934_len:227	IPR002223	Proteinase inhibitor I2, Kunitz metazoa
HINDICA_D_7866_Transcript_3/3_m.144296_len:291	IPR002110	Ankyrin repeat
HINDICA_D_7866_Transcript_3/3_m.144296_len:291	IPR020683	Ankyrin repeat-containing domain
HINDICA_D_7866_Transcript_3/3_m.144296_len:291	IPR002110	Ankyrin repeat
HINDICA_D_7866_Transcript_3/3_m.144296_len:291	IPR020683	Ankyrin repeat-containing domain
HINDICA_D_7866_Transcript_3/3_m.144296_len:291	IPR002110	Ankyrin repeat
HINDICA_D_7866_Transcript_3/3_m.144296_len:291	IPR020683	Ankyrin repeat-containing domain
HINDICA_D_7866_Transcript_3/3_m.144296_len:291	IPR002110	Ankyrin repeat
HINDICA_D_7866_Transcript_3/3_m.144296_len:291	IPR020683	Ankyrin repeat-containing domain
HINDICA_D_7866_Transcript_3/3_m.144296_len:291	IPR002110	Ankyrin repeat
HINDICA_D_7866_Transcript_3/3_m.144296_len:291	IPR020683	Ankyrin repeat-containing domain
HINDICA_D_7866_Transcript_3/3_m.144296_len:291	IPR002110	Ankyrin repeat
HINDICA_D_17211_Transcript_1/1_m.44240_len:119	IPR000101	Gamma-glutamyltranspeptidase
HINDICA_D_10955_Transcript_2/2_m.42118_len:292	IPR001623	DnaJ domain
HINDICA_D_1424_Transcript_1/1_m.10156_len:209	IPR002557	Chitin binding domain
HINDICA_D_6004_Transcript_1/4_m.105068_len:1936	IPR001627	Sema domain
HINDICA_D_6004_Transcript_1/4_m.105068_len:1936	IPR014756	Immunoglobulin E-set
HINDICA_D_6004_Transcript_1/4_m.105068_len:1936	IPR001627	Sema domain
HINDICA_D_6004_Transcript_1/4_m.105068_len:1936	IPR002909	IPT domain
HINDICA_D_6004_Transcript_1/4_m.105068_len:1936	IPR001627	Sema domain
HINDICA_D_6004_Transcript_1/4_m.105068_len:1936	IPR013548	Plexin, cytoplasmic RasGAP domain
HINDICA_D_6004_Transcript_1/4_m.105068_len:1936	IPR002909	IPT domain
HINDICA_D_6004_Transcript_1/4_m.105068_len:1936	IPR013783	Immunoglobulin-like fold
HINDICA_D_6004_Transcript_1/4_m.105068_len:1936	IPR001627	Sema domain
HINDICA_D_6004_Transcript_1/4_m.105068_len:1936	IPR013783	Immunoglobulin-like fold
HINDICA_D_6004_Transcript_1/4_m.105068_len:1936	IPR003659	Plexin/semaphorin/integrin
HINDICA_D_6004_Transcript_1/4_m.105068_len:1936	IPR015943	WD40/YVTN repeat-like-containing domain
HINDICA_D_6004_Transcript_1/4_m.105068_len:1936	IPR013783	Immunoglobulin-like fold
HINDICA_D_6004_Transcript_1/4_m.105068_len:1936	IPR008936	Rho GTPase activation protein
HINDICA_D_364_Transcript_3/3_m.89126_len:211	IPR007829	TM2
HINDICA_D_364_Transcript_1/3_m.171439_len:211	IPR007829	TM2
HINDICA_D_364_Transcript_2/3_m.161575_len:211	IPR007829	TM2
HINDICA_D_3129_Transcript_1/4_m.123873_len:264	IPR014733	Barwin-like endoglucanase
HINDICA_D_3129_Transcript_1/4_m.123873_len:264	IPR001919	Cellulose-binding domain, family II, bacterial-type
HINDICA_D_3129_Transcript_1/4_m.123873_len:264	IPR009009	RlpA-like double-psi beta-barrel domain
HINDICA_D_3129_Transcript_1/4_m.123873_len:264	IPR012291	Cellulose-binding family II/chitobiase, carbohydrate-binding domain
HINDICA_D_3129_Transcript_1/4_m.123873_len:264	IPR008965	Carbohydrate-binding domain
HINDICA_D_3129_Transcript_1/4_m.123873_len:264	IPR009009	RlpA-like double-psi beta-barrel domain
HINDICA_D_4415_Transcript_1/2_m.167494_len:267	IPR002110	Ankyrin repeat
HINDICA_D_4415_Transcript_1/2_m.167494_len:267	IPR020683	Ankyrin repeat-containing domain
HINDICA_D_4415_Transcript_1/2_m.167494_len:267	IPR002110	Ankyrin repeat
HINDICA_D_4415_Transcript_1/2_m.167494_len:267	IPR020683	Ankyrin repeat-containing domain
HINDICA_D_4415_Transcript_1/2_m.167494_len:267	IPR002110	Ankyrin repeat
HINDICA_D_4415_Transcript_1/2_m.167494_len:267	IPR020683	Ankyrin repeat-containing domain
HINDICA_D_4415_Transcript_1/2_m.167494_len:267	IPR002110	Ankyrin repeat
HINDICA_D_4415_Transcript_2/2_m.118777_len:267	IPR002110	Ankyrin repeat
HINDICA_D_4415_Transcript_2/2_m.118777_len:267	IPR020683	Ankyrin repeat-containing domain
HINDICA_D_4415_Transcript_2/2_m.118777_len:267	IPR002110	Ankyrin repeat
HINDICA_D_4415_Transcript_2/2_m.118777_len:267	IPR020683	Ankyrin repeat-containing domain
HINDICA_D_4415_Transcript_2/2_m.118777_len:267	IPR002110	Ankyrin repeat
HINDICA_D_4415_Transcript_2/2_m.118777_len:267	IPR020683	Ankyrin repeat-containing domain
HINDICA_D_4415_Transcript_2/2_m.118777_len:267	IPR002110	Ankyrin repeat
HINDICA_D_5828_Transcript_1/2_m.150513_len:497	IPR020946	Flavin monooxygenase-like
HINDICA_D_5828_Transcript_1/2_m.150513_len:497	IPR000960	Flavin monooxygenase FMO
HINDICA_D_5828_Transcript_1/2_m.150513_len:497	IPR012143	Dimethylaniline monooxygenase, N-oxide-forming
HINDICA_D_15340_Transcript_1/1_m.38728_len:100	IPR004841	Amino acid permease/ SLC12A domain
HINDICA_D_14091_Transcript_1/1_m.109286_len:334	IPR018087	Glycoside hydrolase, family 5, conserved site
HINDICA_D_14091_Transcript_1/1_m.109286_len:334	IPR013781	Glycoside hydrolase, catalytic domain
HINDICA_D_14091_Transcript_1/1_m.109286_len:334	IPR017853	Glycoside hydrolase, superfamily
HINDICA_D_14091_Transcript_1/1_m.109286_len:334	IPR001547	Glycoside hydrolase, family 5
HINDICA_D_1917_Transcript_1/1_m.75182_len:617	IPR001936	Ras GTPase-activating protein
HINDICA_D_1917_Transcript_1/1_m.75182_len:617	IPR000008	C2 calcium-dependent membrane targeting
HINDICA_D_1917_Transcript_1/1_m.75182_len:617	IPR008936	Rho GTPase activation protein
HINDICA_D_1917_Transcript_1/1_m.75182_len:617	IPR001936	Ras GTPase-activating protein
HINDICA_D_1917_Transcript_1/1_m.75182_len:617	IPR008973	C2 calcium/lipid-binding domain, CaLB
HINDICA_D_3672_Transcript_2/2_m.16944_len:222	IPR024079	Metallopeptidase, catalytic domain
HINDICA_D_3672_Transcript_2/2_m.16944_len:222	IPR001818	Peptidase M10, metallopeptidase
HINDICA_D_3672_Transcript_2/2_m.16944_len:222	IPR002477	Peptidoglycan binding-like
HINDICA_D_80_Transcript_1/1_m.16667_len:550	IPR000407	Nucleoside phosphatase GDA1/CD39
HINDICA_D_944_Transcript_1/1_m.12187_len:543	IPR002557	Chitin binding domain
HINDICA_D_944_Transcript_1/1_m.12187_len:543	IPR001190	SRCR domain
HINDICA_D_944_Transcript_1/1_m.12187_len:543	IPR002557	Chitin binding domain
HINDICA_D_255_Transcript_1/1_m.22875_len:1087	IPR017853	Glycoside hydrolase, superfamily
HINDICA_D_255_Transcript_1/1_m.22875_len:1087	IPR011583	Chitinase II
HINDICA_D_255_Transcript_1/1_m.22875_len:1087	IPR013781	Glycoside hydrolase, catalytic domain
HINDICA_D_255_Transcript_1/1_m.22875_len:1087	IPR017853	Glycoside hydrolase, superfamily
HINDICA_D_255_Transcript_1/1_m.22875_len:1087	IPR001223	Glycoside hydrolase, family 18, catalytic domain
HINDICA_D_2094_Transcript_1/1_m.115988_len:346	IPR020067	Frizzled domain
HINDICA_D_2094_Transcript_1/1_m.115988_len:346	IPR001134	Netrin domain
HINDICA_D_2094_Transcript_1/1_m.115988_len:346	IPR020067	Frizzled domain
HINDICA_D_1780_Transcript_2/2_m.28815_len:102	IPR016179	Insulin-like
HINDICA_D_11794_Transcript_1/1_m.103497_len:1510	IPR028082	Periplasmic binding protein-like I
HINDICA_D_11794_Transcript_1/1_m.103497_len:1510	IPR017978	GPCR, family 3, C-terminal
HINDICA_D_2106_Transcript_1/2_m.4047_len:262	IPR000571	Zinc finger, CCCH-type
HINDICA_D_5334_Transcript_3/4_m.118044_len:262	IPR011078	Uncharacterised protein family UPF0001
HINDICA_D_5334_Transcript_3/4_m.118044_len:262	IPR001608	Alanine racemase, N-terminal
HINDICA_D_5334_Transcript_3/4_m.118044_len:262	IPR011078	Uncharacterised protein family UPF0001
HINDICA_D_5334_Transcript_4/4_m.53839_len:262	IPR011078	Uncharacterised protein family UPF0001
HINDICA_D_5334_Transcript_4/4_m.53839_len:262	IPR001608	Alanine racemase, N-terminal
HINDICA_D_5334_Transcript_4/4_m.53839_len:262	IPR011078	Uncharacterised protein family UPF0001
HINDICA_D_3133_Transcript_3/4_m.156728_len:214	IPR012336	Thioredoxin-like fold
HINDICA_D_3133_Transcript_3/4_m.156728_len:214	IPR000889	Glutathione peroxidase
HINDICA_D_3133_Transcript_3/4_m.156728_len:214	IPR012336	Thioredoxin-like fold
HINDICA_D_3133_Transcript_3/4_m.156728_len:214	IPR000889	Glutathione peroxidase
HINDICA_D_3133_Transcript_1/4_m.3484_len:214	IPR012336	Thioredoxin-like fold
HINDICA_D_3133_Transcript_1/4_m.3484_len:214	IPR000889	Glutathione peroxidase
HINDICA_D_3133_Transcript_1/4_m.3484_len:214	IPR012336	Thioredoxin-like fold
HINDICA_D_3133_Transcript_1/4_m.3484_len:214	IPR000889	Glutathione peroxidase
HINDICA_D_346_Transcript_2/3_m.147482_len:483	IPR001991	Sodium:dicarboxylate symporter
HINDICA_D_346_Transcript_2/3_m.147482_len:483	IPR018107	Sodium:dicarboxylate symporter, conserved site
HINDICA_D_346_Transcript_2/3_m.147482_len:483	IPR001991	Sodium:dicarboxylate symporter
HINDICA_D_4751_Transcript_1/6_m.136372_len:76	IPR017853	Glycoside hydrolase, superfamily
HINDICA_D_4751_Transcript_1/6_m.136372_len:76	IPR013781	Glycoside hydrolase, catalytic domain
HINDICA_D_1564_Transcript_2/4_m.87553_len:651	IPR001863	Glypican
HINDICA_D_3072_Transcript_3/3_m.173048_len:260	IPR013057	Amino acid transporter, transmembrane
HINDICA_D_7099_Transcript_2/2_m.159169_len:356	IPR024079	Metallopeptidase, catalytic domain
HINDICA_D_7099_Transcript_2/2_m.159169_len:356	IPR006026	Peptidase, metallopeptidase
HINDICA_D_7099_Transcript_2/2_m.159169_len:356	IPR002477	Peptidoglycan binding-like
HINDICA_D_7099_Transcript_2/2_m.159169_len:356	IPR021190	Peptidase M10A
HINDICA_D_7099_Transcript_2/2_m.159169_len:356	IPR001818	Peptidase M10, metallopeptidase
HINDICA_D_7099_Transcript_2/2_m.159169_len:356	IPR002477	Peptidoglycan binding-like
HINDICA_D_580_Transcript_1/1_m.24916_len:443	IPR012336	Thioredoxin-like fold
HINDICA_D_580_Transcript_1/1_m.24916_len:443	IPR013766	Thioredoxin domain
HINDICA_D_580_Transcript_1/1_m.24916_len:443	IPR012336	Thioredoxin-like fold
HINDICA_D_993_Transcript_1/1_m.6221_len:354	IPR005013	Dolichyl-diphosphooligosaccharide--protein glycosyltransferase subunit WBP1
HINDICA_D_6325_Transcript_1/1_m.109729_len:193	IPR011065	Kunitz inhibitor ST1-like
HINDICA_D_6325_Transcript_1/1_m.109729_len:193	IPR002160	Proteinase inhibitor I3, Kunitz legume
HINDICA_D_14683_Transcript_1/1_m.8743_len:169	IPR011992	EF-hand domain pair
HINDICA_D_14683_Transcript_1/1_m.8743_len:169	IPR018247	EF-Hand 1, calcium-binding site
HINDICA_D_14683_Transcript_1/1_m.8743_len:169	IPR019577	SPARC/Testican, calcium-binding domain
HINDICA_D_7191_Transcript_2/2_m.121359_len:519	IPR014709	Glutathione synthase domain
HINDICA_D_7191_Transcript_2/2_m.121359_len:519	IPR005615	Glutathione synthase, eukaryotic
HINDICA_D_7191_Transcript_2/2_m.121359_len:519	IPR004887	Glutathione synthase, substrate-binding, eukaryotic
HINDICA_D_7191_Transcript_2/2_m.121359_len:519	IPR016185	Pre-ATP-grasp domain
HINDICA_D_7191_Transcript_2/2_m.121359_len:519	IPR014042	Glutathione synthase, alpha-helical, eukaryotic
HINDICA_D_7191_Transcript_2/2_m.121359_len:519	IPR004887	Glutathione synthase, substrate-binding, eukaryotic
HINDICA_D_7191_Transcript_2/2_m.121359_len:519	IPR005615	Glutathione synthase, eukaryotic
HINDICA_D_7191_Transcript_2/2_m.121359_len:519	IPR014049	Glutathione synthase, N-terminal, eukaryotic
HINDICA_D_7191_Transcript_1/2_m.174171_len:519	IPR014709	Glutathione synthase domain
HINDICA_D_7191_Transcript_1/2_m.174171_len:519	IPR005615	Glutathione synthase, eukaryotic
HINDICA_D_7191_Transcript_1/2_m.174171_len:519	IPR004887	Glutathione synthase, substrate-binding, eukaryotic
HINDICA_D_7191_Transcript_1/2_m.174171_len:519	IPR016185	Pre-ATP-grasp domain
HINDICA_D_7191_Transcript_1/2_m.174171_len:519	IPR014042	Glutathione synthase, alpha-helical, eukaryotic
HINDICA_D_7191_Transcript_1/2_m.174171_len:519	IPR004887	Glutathione synthase, substrate-binding, eukaryotic
HINDICA_D_7191_Transcript_1/2_m.174171_len:519	IPR005615	Glutathione synthase, eukaryotic
HINDICA_D_7191_Transcript_1/2_m.174171_len:519	IPR014049	Glutathione synthase, N-terminal, eukaryotic
HINDICA_D_8067_Transcript_1/2_m.159693_len:188	IPR013083	Zinc finger, RING/FYVE/PHD-type
HINDICA_D_8067_Transcript_1/2_m.159693_len:188	IPR018957	Zinc finger, C3HC4 RING-type
HINDICA_D_8067_Transcript_1/2_m.159693_len:188	IPR001841	Zinc finger, RING-type
HINDICA_D_5323_Transcript_1/1_m.129963_len:258	IPR002350	Kazal domain
HINDICA_D_12328_Transcript_1/1_m.32770_len:281	IPR007373	Thiamin pyrophosphokinase, vitamin B1-binding domain
HINDICA_D_12328_Transcript_1/1_m.32770_len:281	IPR007371	Thiamin pyrophosphokinase, catalytic domain
HINDICA_D_12328_Transcript_1/1_m.32770_len:281	IPR007373	Thiamin pyrophosphokinase, vitamin B1-binding domain
HINDICA_D_3228_Transcript_1/1_m.12132_len:297	IPR001173	Glycosyl transferase, family 2
HINDICA_D_6006_Transcript_1/1_m.95591_len:156	IPR001534	Transthyretin-like
HINDICA_D_9360_Transcript_1/2_m.59053_len:420	IPR000884	Thrombospondin, type 1 repeat
HINDICA_D_9360_Transcript_1/2_m.59053_len:420	IPR001212	Somatomedin B domain
HINDICA_D_9360_Transcript_1/2_m.59053_len:420	IPR000884	Thrombospondin, type 1 repeat
HINDICA_D_9360_Transcript_1/2_m.59053_len:420	IPR001212	Somatomedin B domain
HINDICA_D_9360_Transcript_2/2_m.131374_len:420	IPR000884	Thrombospondin, type 1 repeat
HINDICA_D_9360_Transcript_2/2_m.131374_len:420	IPR001212	Somatomedin B domain
HINDICA_D_9360_Transcript_2/2_m.131374_len:420	IPR000884	Thrombospondin, type 1 repeat
HINDICA_D_9360_Transcript_2/2_m.131374_len:420	IPR001212	Somatomedin B domain
HINDICA_D_12546_Transcript_1/1_m.143418_len:506	IPR006149	EB domain
HINDICA_D_10239_Transcript_1/2_m.37350_len:561	IPR006026	Peptidase, metallopeptidase
HINDICA_D_10239_Transcript_1/2_m.37350_len:561	IPR001506	Peptidase M12A, astacin
HINDICA_D_10239_Transcript_1/2_m.37350_len:561	IPR024079	Metallopeptidase, catalytic domain
HINDICA_D_14429_Transcript_1/1_m.63361_len:372	IPR001345	Phosphoglycerate/bisphosphoglycerate mutase, active site
HINDICA_D_14429_Transcript_1/1_m.63361_len:372	IPR013078	Histidine phosphatase superfamily, clade-1
HINDICA_D_9624_Transcript_1/1_m.4735_len:91	IPR002223	Proteinase inhibitor I2, Kunitz metazoa
HINDICA_D_717_Transcript_1/1_m.9231_len:171	IPR004843	Phosphoesterase domain
HINDICA_D_3103_Transcript_1/4_m.72999_len:481	IPR001128	Cytochrome P450
HINDICA_D_3103_Transcript_1/4_m.72999_len:481	IPR002401	Cytochrome P450, E-class, group I
HINDICA_D_3103_Transcript_1/4_m.72999_len:481	IPR001128	Cytochrome P450
HINDICA_D_291_Transcript_1/1_m.2444_len:223	IPR005828	General substrate transporter
HINDICA_D_291_Transcript_1/1_m.2444_len:223	IPR003663	Sugar/inositol transporter
HINDICA_D_291_Transcript_1/1_m.2444_len:223	IPR016196	Major facilitator superfamily domain, general substrate transporter
HINDICA_D_291_Transcript_1/1_m.2444_len:223	IPR020846	Major facilitator superfamily domain
HINDICA_D_13249_Transcript_1/2_m.75720_len:145	IPR020683	Ankyrin repeat-containing domain
HINDICA_D_13249_Transcript_1/2_m.75720_len:145	IPR002110	Ankyrin repeat
HINDICA_D_13249_Transcript_1/2_m.75720_len:145	IPR020683	Ankyrin repeat-containing domain
HINDICA_D_13249_Transcript_1/2_m.75720_len:145	IPR002110	Ankyrin repeat
HINDICA_D_13249_Transcript_1/2_m.75720_len:145	IPR020683	Ankyrin repeat-containing domain
HINDICA_D_13249_Transcript_1/2_m.75720_len:145	IPR002110	Ankyrin repeat
HINDICA_D_13396_Transcript_1/1_m.76350_len:79	IPR016196	Major facilitator superfamily domain, general substrate transporter
HINDICA_D_907_Transcript_1/1_m.5989_len:407	IPR006639	Presenilin/signal peptide peptidase
HINDICA_D_907_Transcript_1/1_m.5989_len:407	IPR007369	Peptidase A22B, signal peptide peptidase
HINDICA_D_670_Transcript_3/3_m.169726_len:182	IPR001313	Pumilio RNA-binding repeat
HINDICA_D_670_Transcript_3/3_m.169726_len:182	IPR011989	Armadillo-like helical
HINDICA_D_670_Transcript_3/3_m.169726_len:182	IPR001313	Pumilio RNA-binding repeat
HINDICA_D_670_Transcript_3/3_m.169726_len:182	IPR016024	Armadillo-type fold
HINDICA_D_7733_Transcript_1/2_m.169775_len:167	IPR016179	Insulin-like
HINDICA_D_7733_Transcript_2/2_m.145315_len:167	IPR016179	Insulin-like
HINDICA_D_346_Transcript_1/3_m.155754_len:483	IPR001991	Sodium:dicarboxylate symporter
HINDICA_D_346_Transcript_1/3_m.155754_len:483	IPR018107	Sodium:dicarboxylate symporter, conserved site
HINDICA_D_488_Transcript_1/2_m.55798_len:643	IPR022398	Peptidase S8, subtilisin, His-active site
HINDICA_D_488_Transcript_1/2_m.55798_len:643	IPR023827	Peptidase S8, subtilisin, Asp-active site
HINDICA_D_488_Transcript_1/2_m.55798_len:643	IPR023828	Peptidase S8, subtilisin, Ser-active site
HINDICA_D_488_Transcript_1/2_m.55798_len:643	IPR000209	Peptidase S8/S53 domain
HINDICA_D_488_Transcript_1/2_m.55798_len:643	IPR002884	Proprotein convertase, P
HINDICA_D_488_Transcript_1/2_m.55798_len:643	IPR008979	Galactose-binding domain-like
HINDICA_D_488_Transcript_1/2_m.55798_len:643	IPR015500	Peptidase S8, subtilisin-related
HINDICA_D_488_Transcript_1/2_m.55798_len:643	IPR000209	Peptidase S8/S53 domain
HINDICA_D_7089_Transcript_1/2_m.109640_len:327	IPR013320	Concanavalin A-like lectin/glucanase, subgroup
HINDICA_D_7089_Transcript_1/2_m.109640_len:327	IPR001079	Galectin, carbohydrate recognition domain
HINDICA_D_7089_Transcript_1/2_m.109640_len:327	IPR008985	Concanavalin A-like lectin/glucanases superfamily
HINDICA_D_7089_Transcript_1/2_m.109640_len:327	IPR001079	Galectin, carbohydrate recognition domain
HINDICA_D_7089_Transcript_1/2_m.109640_len:327	IPR008985	Concanavalin A-like lectin/glucanases superfamily
HINDICA_D_7089_Transcript_1/2_m.109640_len:327	IPR001079	Galectin, carbohydrate recognition domain
HINDICA_D_7089_Transcript_1/2_m.109640_len:327	IPR013320	Concanavalin A-like lectin/glucanase, subgroup
HINDICA_D_390_Transcript_1/1_m.83145_len:290	IPR006149	EB domain
HINDICA_D_1377_Transcript_1/1_m.62262_len:179	IPR002200	Elicitin
HINDICA_D_1124_Transcript_2/2_m.165604_len:500	IPR020067	Frizzled domain
HINDICA_D_1124_Transcript_2/2_m.165604_len:500	IPR000539	Frizzled protein
HINDICA_D_1124_Transcript_2/2_m.165604_len:500	IPR020067	Frizzled domain
HINDICA_D_1124_Transcript_2/2_m.165604_len:500	IPR017981	GPCR, family 2-like
HINDICA_D_1124_Transcript_2/2_m.165604_len:500	IPR000539	Frizzled protein
HINDICA_D_1124_Transcript_2/2_m.165604_len:500	IPR020067	Frizzled domain
HINDICA_D_1124_Transcript_1/2_m.22773_len:500	IPR020067	Frizzled domain
HINDICA_D_1124_Transcript_1/2_m.22773_len:500	IPR000539	Frizzled protein
HINDICA_D_1124_Transcript_1/2_m.22773_len:500	IPR020067	Frizzled domain
HINDICA_D_1124_Transcript_1/2_m.22773_len:500	IPR017981	GPCR, family 2-like
HINDICA_D_1124_Transcript_1/2_m.22773_len:500	IPR000539	Frizzled protein
HINDICA_D_1124_Transcript_1/2_m.22773_len:500	IPR020067	Frizzled domain
HINDICA_D_4071_Transcript_1/1_m.12964_len:595	IPR013126	Heat shock protein 70 family
HINDICA_D_5007_Transcript_1/6_m.154772_len:814	IPR000519	P-type trefoil
HINDICA_D_5007_Transcript_1/6_m.154772_len:814	IPR000322	Glycoside hydrolase, family 31
HINDICA_D_5007_Transcript_1/6_m.154772_len:814	IPR000519	P-type trefoil
HINDICA_D_5007_Transcript_1/6_m.154772_len:814	IPR011013	Galactose mutarotase-like domain
HINDICA_D_5007_Transcript_1/6_m.154772_len:814	IPR000519	P-type trefoil
HINDICA_D_5007_Transcript_1/6_m.154772_len:814	IPR000322	Glycoside hydrolase, family 31
HINDICA_D_5007_Transcript_1/6_m.154772_len:814	IPR017853	Glycoside hydrolase, superfamily
HINDICA_D_5007_Transcript_1/6_m.154772_len:814	IPR000322	Glycoside hydrolase, family 31
HINDICA_D_6896_Transcript_1/2_m.148837_len:852	IPR001611	Leucine-rich repeat
HINDICA_D_6896_Transcript_1/2_m.148837_len:852	IPR003591	Leucine-rich repeat, typical subtype
HINDICA_D_6896_Transcript_1/2_m.148837_len:852	IPR001611	Leucine-rich repeat
HINDICA_D_6896_Transcript_1/2_m.148837_len:852	IPR000483	Cysteine-rich flanking region, C-terminal
HINDICA_D_6896_Transcript_1/2_m.148837_len:852	IPR001611	Leucine-rich repeat
HINDICA_D_11371_Transcript_1/1_m.60564_len:373	IPR027417	P-loop containing nucleoside triphosphate hydrolase
HINDICA_D_2660_Transcript_2/3_m.61430_len:256	IPR003406	Glycosyl transferase, family 14
HINDICA_D_2427_Transcript_5/6_m.174308_len:2200	IPR018497	Peptidase M13, C-terminal domain
HINDICA_D_2427_Transcript_5/6_m.174308_len:2200	IPR008753	Peptidase M13, N-terminal domain
HINDICA_D_2427_Transcript_5/6_m.174308_len:2200	IPR024079	Metallopeptidase, catalytic domain
HINDICA_D_2427_Transcript_5/6_m.174308_len:2200	IPR018497	Peptidase M13, C-terminal domain
HINDICA_D_2808_Transcript_2/2_m.147680_len:426	IPR000560	Histidine phosphatase superfamily, clade-2
HINDICA_D_2808_Transcript_1/2_m.151424_len:426	IPR000560	Histidine phosphatase superfamily, clade-2
HINDICA_D_10628_Transcript_4/4_m.104412_len:709	IPR011990	Tetratricopeptide-like helical
HINDICA_D_10628_Transcript_4/4_m.104412_len:709	IPR006597	Sel1-like
HINDICA_D_10628_Transcript_2/4_m.151171_len:709	IPR011990	Tetratricopeptide-like helical
HINDICA_D_10628_Transcript_2/4_m.151171_len:709	IPR006597	Sel1-like
HINDICA_D_10628_Transcript_3/4_m.48955_len:709	IPR011990	Tetratricopeptide-like helical
HINDICA_D_10628_Transcript_3/4_m.48955_len:709	IPR006597	Sel1-like
HINDICA_D_10662_Transcript_1/1_m.13248_len:279	IPR020849	Small GTPase superfamily, Ras type
HINDICA_D_10662_Transcript_1/1_m.13248_len:279	IPR001806	Small GTPase superfamily
HINDICA_D_10662_Transcript_1/1_m.13248_len:279	IPR002041	Ran GTPase
HINDICA_D_10662_Transcript_1/1_m.13248_len:279	IPR005225	Small GTP-binding protein domain
HINDICA_D_10662_Transcript_1/1_m.13248_len:279	IPR003578	Small GTPase superfamily, Rho type
HINDICA_D_10662_Transcript_1/1_m.13248_len:279	IPR027417	P-loop containing nucleoside triphosphate hydrolase
HINDICA_D_10662_Transcript_1/1_m.13248_len:279	IPR001806	Small GTPase superfamily
HINDICA_D_10662_Transcript_1/1_m.13248_len:279	IPR020849	Small GTPase superfamily, Ras type
HINDICA_D_10662_Transcript_1/1_m.13248_len:279	IPR003579	Small GTPase superfamily, Rab type
HINDICA_D_1183_Transcript_1/1_m.105000_len:425	IPR019378	GDP-fucose protein O-fucosyltransferase
HINDICA_D_12194_Transcript_2/2_m.142937_len:77	IPR002919	Trypsin Inhibitor-like, cysteine rich domain
HINDICA_D_11673_Transcript_1/1_m.8155_len:173	IPR000504	RNA recognition motif domain
HINDICA_D_11673_Transcript_1/1_m.8155_len:173	IPR012677	Nucleotide-binding, alpha-beta plait
HINDICA_D_11673_Transcript_1/1_m.8155_len:173	IPR022023	U1 small nuclear ribonucleoprotein of 70kDa N-terminal
HINDICA_D_3375_Transcript_1/1_m.55777_len:575	IPR025258	Domain of unknown function DUF4206
HINDICA_D_1753_Transcript_2/5_m.116062_len:255	IPR016040	NAD(P)-binding domain
HINDICA_D_1753_Transcript_2/5_m.116062_len:255	IPR001509	NAD-dependent epimerase/dehydratase
HINDICA_D_7496_Transcript_1/1_m.111358_len:292	IPR014044	CAP domain
HINDICA_D_7496_Transcript_1/1_m.111358_len:292	IPR001283	Allergen V5/Tpx-1-related
HINDICA_D_7496_Transcript_1/1_m.111358_len:292	IPR014044	CAP domain
HINDICA_D_7496_Transcript_1/1_m.111358_len:292	IPR002413	Ves allergen
HINDICA_D_7496_Transcript_1/1_m.111358_len:292	IPR001283	Allergen V5/Tpx-1-related
HINDICA_D_7496_Transcript_1/1_m.111358_len:292	IPR014044	CAP domain
HINDICA_D_2231_Transcript_1/1_m.1364_len:152	IPR018124	Calreticulin/calnexin, conserved site
HINDICA_D_2231_Transcript_1/1_m.1364_len:152	IPR013320	Concanavalin A-like lectin/glucanase, subgroup
HINDICA_D_2231_Transcript_1/1_m.1364_len:152	IPR001580	Calreticulin/calnexin
HINDICA_D_2231_Transcript_1/1_m.1364_len:152	IPR008985	Concanavalin A-like lectin/glucanases superfamily
HINDICA_D_5324_Transcript_1/1_m.137738_len:381	IPR015880	Zinc finger, C2H2-like
HINDICA_D_5324_Transcript_1/1_m.137738_len:381	IPR007087	Zinc finger, C2H2
HINDICA_D_16607_Transcript_1/1_m.115695_len:248	IPR011992	EF-hand domain pair
HINDICA_D_16607_Transcript_1/1_m.115695_len:248	IPR002048	EF-hand domain
HINDICA_D_16607_Transcript_1/1_m.115695_len:248	IPR011992	EF-hand domain pair
HINDICA_D_16607_Transcript_1/1_m.115695_len:248	IPR002048	EF-hand domain
HINDICA_D_16607_Transcript_1/1_m.115695_len:248	IPR018247	EF-Hand 1, calcium-binding site
HINDICA_D_16607_Transcript_1/1_m.115695_len:248	IPR002048	EF-hand domain
HINDICA_D_16607_Transcript_1/1_m.115695_len:248	IPR011992	EF-hand domain pair
HINDICA_D_16607_Transcript_1/1_m.115695_len:248	IPR002048	EF-hand domain
HINDICA_D_16607_Transcript_1/1_m.115695_len:248	IPR018247	EF-Hand 1, calcium-binding site
HINDICA_D_16607_Transcript_1/1_m.115695_len:248	IPR002048	EF-hand domain
HINDICA_D_2590_Transcript_1/1_m.52090_len:1304	IPR005533	AMOP
HINDICA_D_2590_Transcript_1/1_m.52090_len:1304	IPR003886	Nidogen, extracellular domain
HINDICA_D_2590_Transcript_1/1_m.52090_len:1304	IPR005533	AMOP
HINDICA_D_7370_Transcript_1/1_m.127324_len:715	IPR000859	CUB domain
HINDICA_D_2733_Transcript_3/3_m.96257_len:159	IPR001534	Transthyretin-like
HINDICA_D_6019_Transcript_1/1_m.79807_len:453	IPR013126	Heat shock protein 70 family
HINDICA_D_6019_Transcript_1/1_m.79807_len:453	IPR018181	Heat shock protein 70, conserved site
HINDICA_D_6019_Transcript_1/1_m.79807_len:453	IPR013126	Heat shock protein 70 family
HINDICA_D_6019_Transcript_1/1_m.79807_len:453	IPR018181	Heat shock protein 70, conserved site
HINDICA_D_12582_Transcript_1/1_m.92440_len:278	IPR000560	Histidine phosphatase superfamily, clade-2
HINDICA_D_15583_Transcript_1/1_m.33253_len:224	IPR016196	Major facilitator superfamily domain, general substrate transporter
HINDICA_D_8724_Transcript_1/1_m.15224_len:158	IPR008758	Peptidase S28
HINDICA_D_11596_Transcript_1/3_m.165028_len:531	IPR017942	Lipid-binding serum glycoprotein, N-terminal
HINDICA_D_11596_Transcript_1/3_m.165028_len:531	IPR001124	Lipid-binding serum glycoprotein, C-terminal
HINDICA_D_11596_Transcript_1/3_m.165028_len:531	IPR017943	Bactericidal permeability-increasing protein, alpha/beta domain
HINDICA_D_11596_Transcript_1/3_m.165028_len:531	IPR017942	Lipid-binding serum glycoprotein, N-terminal
HINDICA_D_11596_Transcript_1/3_m.165028_len:531	IPR001124	Lipid-binding serum glycoprotein, C-terminal
HINDICA_D_11596_Transcript_1/3_m.165028_len:531	IPR017943	Bactericidal permeability-increasing protein, alpha/beta domain
HINDICA_D_8694_Transcript_1/3_m.137196_len:438	IPR005052	Legume-like lectin
HINDICA_D_8694_Transcript_1/3_m.137196_len:438	IPR008985	Concanavalin A-like lectin/glucanases superfamily
HINDICA_D_8694_Transcript_1/3_m.137196_len:438	IPR005052	Legume-like lectin
HINDICA_D_8694_Transcript_1/3_m.137196_len:438	IPR013320	Concanavalin A-like lectin/glucanase, subgroup
HINDICA_D_5124_Transcript_1/2_m.155863_len:260	IPR000845	Nucleoside phosphorylase domain
HINDICA_D_5124_Transcript_1/2_m.155863_len:260	IPR010044	Methylthioadenosine phosphorylase (MTAP)
HINDICA_D_5124_Transcript_1/2_m.155863_len:260	IPR000845	Nucleoside phosphorylase domain
HINDICA_D_387_Transcript_1/2_m.55684_len:988	IPR015943	WD40/YVTN repeat-like-containing domain
HINDICA_D_5504_Transcript_1/1_m.52651_len:348	IPR003726	Homocysteine S-methyltransferase
HINDICA_D_14568_Transcript_1/1_m.104753_len:185	IPR002602	Domain of unknown function DB
HINDICA_D_3594_Transcript_1/2_m.6790_len:95	IPR022559	Protein of unknown function DUF2650
HINDICA_D_3594_Transcript_2/2_m.115578_len:95	IPR022559	Protein of unknown function DUF2650
HINDICA_D_9993_Transcript_1/3_m.92044_len:1661	IPR003961	Fibronectin, type III
HINDICA_D_9993_Transcript_1/3_m.92044_len:1661	IPR000387	Protein-tyrosine/Dual specificity phosphatase
HINDICA_D_9993_Transcript_1/3_m.92044_len:1661	IPR013783	Immunoglobulin-like fold
HINDICA_D_9993_Transcript_1/3_m.92044_len:1661	IPR000242	Protein-tyrosine phosphatase, receptor/non-receptor type
HINDICA_D_9993_Transcript_1/3_m.92044_len:1661	IPR016130	Protein-tyrosine phosphatase, active site
HINDICA_D_9993_Transcript_1/3_m.92044_len:1661	IPR003595	Protein-tyrosine phosphatase, catalytic
HINDICA_D_9993_Transcript_1/3_m.92044_len:1661	IPR003961	Fibronectin, type III
HINDICA_D_9993_Transcript_1/3_m.92044_len:1661	IPR013783	Immunoglobulin-like fold
HINDICA_D_9993_Transcript_1/3_m.92044_len:1661	IPR000242	Protein-tyrosine phosphatase, receptor/non-receptor type
HINDICA_D_9993_Transcript_1/3_m.92044_len:1661	IPR003961	Fibronectin, type III
HINDICA_D_9993_Transcript_1/3_m.92044_len:1661	IPR000242	Protein-tyrosine phosphatase, receptor/non-receptor type
HINDICA_D_9993_Transcript_1/3_m.92044_len:1661	IPR003961	Fibronectin, type III
HINDICA_D_9993_Transcript_1/3_m.92044_len:1661	IPR000242	Protein-tyrosine phosphatase, receptor/non-receptor type
HINDICA_D_11596_Transcript_2/3_m.160610_len:540	IPR001124	Lipid-binding serum glycoprotein, C-terminal
HINDICA_D_11596_Transcript_2/3_m.160610_len:540	IPR017943	Bactericidal permeability-increasing protein, alpha/beta domain
HINDICA_D_11596_Transcript_2/3_m.160610_len:540	IPR017942	Lipid-binding serum glycoprotein, N-terminal
HINDICA_D_11596_Transcript_2/3_m.160610_len:540	IPR017943	Bactericidal permeability-increasing protein, alpha/beta domain
HINDICA_D_11596_Transcript_2/3_m.160610_len:540	IPR017942	Lipid-binding serum glycoprotein, N-terminal
HINDICA_D_11596_Transcript_2/3_m.160610_len:540	IPR001124	Lipid-binding serum glycoprotein, C-terminal
HINDICA_D_11591_Transcript_1/1_m.68753_len:666	IPR013015	Laminin IV
HINDICA_D_11591_Transcript_1/1_m.68753_len:666	IPR002049	EGF-like, laminin
HINDICA_D_11591_Transcript_1/1_m.68753_len:666	IPR008211	Laminin, N-terminal
HINDICA_D_11591_Transcript_1/1_m.68753_len:666	IPR002049	EGF-like, laminin
HINDICA_D_11591_Transcript_1/1_m.68753_len:666	IPR008211	Laminin, N-terminal
HINDICA_D_11591_Transcript_1/1_m.68753_len:666	IPR002049	EGF-like, laminin
HINDICA_D_11591_Transcript_1/1_m.68753_len:666	IPR008211	Laminin, N-terminal
HINDICA_D_11591_Transcript_1/1_m.68753_len:666	IPR002049	EGF-like, laminin
HINDICA_D_925_Transcript_1/1_m.8295_len:176	IPR011893	Selenoprotein, Rdx type
HINDICA_D_925_Transcript_1/1_m.8295_len:176	IPR012336	Thioredoxin-like fold
HINDICA_D_17339_Transcript_1/1_m.102456_len:310	IPR003582	Metridin-like ShK toxin
HINDICA_D_17339_Transcript_1/1_m.102456_len:310	IPR014010	Egg jelly receptor, REJ-like
HINDICA_D_6774_Transcript_1/3_m.159586_len:184	IPR018020	Oxo-4-hydroxy-4-carboxy-5-ureidoimidazoline decarboxylase
HINDICA_D_6774_Transcript_1/3_m.159586_len:184	IPR017580	2-oxo-4-hydroxy-4-carboxy-5-ureidoimidazoline decarboxylase, type 1
HINDICA_D_6774_Transcript_1/3_m.159586_len:184	IPR018020	Oxo-4-hydroxy-4-carboxy-5-ureidoimidazoline decarboxylase
HINDICA_D_2118_Transcript_1/1_m.5253_len:131	IPR006186	Serine/threonine-specific protein phosphatase/bis(5-nucleosyl)-tetraphosphatase
HINDICA_D_2118_Transcript_1/1_m.5253_len:131	IPR004843	Phosphoesterase domain
HINDICA_D_2170_Transcript_4/5_m.106163_len:955	IPR008795	Prominin
HINDICA_D_4949_Transcript_1/1_m.101416_len:384	IPR026906	Leucine rich repeat 5
HINDICA_D_7522_Transcript_1/1_m.91947_len:381	IPR007217	Per1-like
HINDICA_D_1859_Transcript_6/6_m.142150_len:69	IPR000795	Elongation factor, GTP-binding domain
HINDICA_D_1859_Transcript_6/6_m.142150_len:69	IPR027417	P-loop containing nucleoside triphosphate hydrolase
HINDICA_D_2357_Transcript_1/1_m.5667_len:356	IPR001404	Heat shock protein Hsp90 family
HINDICA_D_2357_Transcript_1/1_m.5667_len:356	IPR020575	Heat shock protein Hsp90, N-terminal
HINDICA_D_2357_Transcript_1/1_m.5667_len:356	IPR003594	Histidine kinase-like ATPase, ATP-binding domain
HINDICA_D_2357_Transcript_1/1_m.5667_len:356	IPR006311	Twin-arginine translocation pathway, signal sequence
HINDICA_D_2357_Transcript_1/1_m.5667_len:356	IPR003594	Histidine kinase-like ATPase, ATP-binding domain
HINDICA_D_2357_Transcript_1/1_m.5667_len:356	IPR019805	Heat shock protein Hsp90, conserved site
HINDICA_D_8989_Transcript_1/2_m.8016_len:162	IPR008253	Marvel domain
HINDICA_D_3927_Transcript_1/1_m.112815_len:287	IPR001128	Cytochrome P450
HINDICA_D_3927_Transcript_1/1_m.112815_len:287	IPR002401	Cytochrome P450, E-class, group I
HINDICA_D_4108_Transcript_1/2_m.150915_len:617	IPR001507	Zona pellucida domain
HINDICA_D_12407_Transcript_3/3_m.79509_len:259	IPR012999	Pyridine nucleotide-disulphide oxidoreductase, class I, active site
HINDICA_D_12407_Transcript_3/3_m.79509_len:259	IPR023753	Pyridine nucleotide-disulphide oxidoreductase, FAD/NAD(P)-binding domain
HINDICA_D_12407_Transcript_3/3_m.79509_len:259	IPR001327	Pyridine nucleotide-disulphide oxidoreductase, NAD-binding domain
HINDICA_D_12407_Transcript_3/3_m.79509_len:259	IPR013027	FAD-dependent pyridine nucleotide-disulphide oxidoreductase
HINDICA_D_10498_Transcript_2/2_m.5739_len:639	IPR003582	Metridin-like ShK toxin
HINDICA_D_10498_Transcript_2/2_m.5739_len:639	IPR019791	Haem peroxidase, animal, subgroup
HINDICA_D_10498_Transcript_2/2_m.5739_len:639	IPR002007	Haem peroxidase, animal
HINDICA_D_10498_Transcript_2/2_m.5739_len:639	IPR010255	Haem peroxidase
HINDICA_D_10498_Transcript_2/2_m.5739_len:639	IPR002007	Haem peroxidase, animal
HINDICA_D_18_Transcript_1/1_m.5864_len:357	IPR005016	TMS membrane protein/tumour differentially expressed protein
HINDICA_D_1419_Transcript_1/1_m.15466_len:719	IPR015424	Pyridoxal phosphate-dependent transferase
HINDICA_D_1419_Transcript_1/1_m.15466_len:719	IPR003437	Glycine cleavage system P protein, homodimeric
HINDICA_D_1419_Transcript_1/1_m.15466_len:719	IPR015424	Pyridoxal phosphate-dependent transferase
HINDICA_D_1419_Transcript_1/1_m.15466_len:719	IPR020580	Glycine cleavage system P-protein, N-terminal
HINDICA_D_1419_Transcript_1/1_m.15466_len:719	IPR015421	Pyridoxal phosphate-dependent transferase, major region, subdomain 1
HINDICA_D_6554_Transcript_1/2_m.100954_len:150	IPR001534	Transthyretin-like
HINDICA_D_6554_Transcript_2/2_m.6810_len:150	IPR001534	Transthyretin-like
HINDICA_D_3803_Transcript_1/1_m.1689_len:206	IPR002130	Cyclophilin-like peptidyl-prolyl cis-trans isomerase domain
HINDICA_D_3803_Transcript_1/1_m.1689_len:206	IPR024936	Cyclophilin-type peptidyl-prolyl cis-trans isomerase
HINDICA_D_3803_Transcript_1/1_m.1689_len:206	IPR002130	Cyclophilin-like peptidyl-prolyl cis-trans isomerase domain
HINDICA_D_3803_Transcript_1/1_m.1689_len:206	IPR020892	Cyclophilin-type peptidyl-prolyl cis-trans isomerase, conserved site
HINDICA_D_292_Transcript_2/2_m.75632_len:786	IPR008465	Dystroglycan
HINDICA_D_292_Transcript_2/2_m.75632_len:786	IPR013783	Immunoglobulin-like fold
HINDICA_D_292_Transcript_2/2_m.75632_len:786	IPR015919	Cadherin-like
HINDICA_D_292_Transcript_1/2_m.171027_len:786	IPR008465	Dystroglycan
HINDICA_D_292_Transcript_1/2_m.171027_len:786	IPR013783	Immunoglobulin-like fold
HINDICA_D_292_Transcript_1/2_m.171027_len:786	IPR015919	Cadherin-like
HINDICA_D_5342_Transcript_2/2_m.154476_len:523	IPR002172	Low-density lipoprotein (LDL) receptor class A repeat
HINDICA_D_5342_Transcript_2/2_m.154476_len:523	IPR000859	CUB domain
HINDICA_D_17235_Transcript_1/1_m.97901_len:82	IPR002919	Trypsin Inhibitor-like, cysteine rich domain
HINDICA_D_4872_Transcript_1/1_m.35779_len:325	IPR002861	Reeler domain
HINDICA_D_2618_Transcript_1/1_m.42051_len:129	IPR014044	CAP domain
HINDICA_D_2618_Transcript_1/1_m.42051_len:129	IPR001283	Allergen V5/Tpx-1-related
HINDICA_D_2618_Transcript_1/1_m.42051_len:129	IPR014044	CAP domain
HINDICA_D_16638_Transcript_1/1_m.96960_len:518	IPR000642	Peptidase M41
HINDICA_D_16638_Transcript_1/1_m.96960_len:518	IPR003959	ATPase, AAA-type, core
HINDICA_D_16638_Transcript_1/1_m.96960_len:518	IPR027417	P-loop containing nucleoside triphosphate hydrolase
HINDICA_D_16638_Transcript_1/1_m.96960_len:518	IPR003593	AAA+ ATPase domain
HINDICA_D_3946_Transcript_1/1_m.59938_len:353	IPR004947	Deoxyribonuclease II
HINDICA_D_7581_Transcript_1/2_m.140914_len:556	IPR001128	Cytochrome P450
HINDICA_D_7581_Transcript_1/2_m.140914_len:556	IPR017972	Cytochrome P450, conserved site
HINDICA_D_7581_Transcript_1/2_m.140914_len:556	IPR001128	Cytochrome P450
HINDICA_D_7581_Transcript_1/2_m.140914_len:556	IPR002401	Cytochrome P450, E-class, group I
HINDICA_D_7581_Transcript_1/2_m.140914_len:556	IPR001128	Cytochrome P450
HINDICA_D_12492_Transcript_1/1_m.125032_len:398	IPR020846	Major facilitator superfamily domain
HINDICA_D_12492_Transcript_1/1_m.125032_len:398	IPR016196	Major facilitator superfamily domain, general substrate transporter
HINDICA_D_12492_Transcript_1/1_m.125032_len:398	IPR005828	General substrate transporter
HINDICA_D_12492_Transcript_1/1_m.125032_len:398	IPR005829	Sugar transporter, conserved site
HINDICA_D_9297_Transcript_1/1_m.110314_len:386	IPR002213	UDP-glucuronosyl/UDP-glucosyltransferase
HINDICA_D_9446_Transcript_1/1_m.9238_len:152	IPR023631	Amidase signature domain
HINDICA_D_9446_Transcript_1/1_m.9238_len:152	IPR000120	Amidase
HINDICA_D_6046_Transcript_2/2_m.166001_len:451	IPR000175	Sodium:neurotransmitter symporter
HINDICA_D_12194_Transcript_1/2_m.141234_len:78	IPR002919	Trypsin Inhibitor-like, cysteine rich domain
HINDICA_D_10620_Transcript_1/1_m.55052_len:392	IPR005135	Endonuclease/exonuclease/phosphatase
HINDICA_D_7637_Transcript_3/4_m.157303_len:322	IPR027791	Galactosyltransferase, C-terminal domain
HINDICA_D_7637_Transcript_3/4_m.157303_len:322	IPR027995	Glycosyl transferase group 7, N-terminal
HINDICA_D_7637_Transcript_3/4_m.157303_len:322	IPR003859	Beta-1,4-galactosyltransferase
HINDICA_D_4863_Transcript_1/1_m.138832_len:270	IPR000169	Cysteine peptidase, cysteine active site
HINDICA_D_4863_Transcript_1/1_m.138832_len:270	IPR000668	Peptidase C1A, papain C-terminal
HINDICA_D_4015_Transcript_1/1_m.129209_len:368	IPR008972	Cupredoxin
HINDICA_D_4015_Transcript_1/1_m.129209_len:368	IPR003245	Plastocyanin-like
HINDICA_D_4015_Transcript_1/1_m.129209_len:368	IPR008972	Cupredoxin
HINDICA_D_4015_Transcript_1/1_m.129209_len:368	IPR003245	Plastocyanin-like
HINDICA_D_4015_Transcript_1/1_m.129209_len:368	IPR008972	Cupredoxin
HINDICA_D_2337_Transcript_1/1_m.16256_len:260	IPR012336	Thioredoxin-like fold
HINDICA_D_2337_Transcript_1/1_m.16256_len:260	IPR017937	Thioredoxin, conserved site
HINDICA_D_2337_Transcript_1/1_m.16256_len:260	IPR013766	Thioredoxin domain
HINDICA_D_3808_Transcript_2/4_m.71242_len:308	IPR016196	Major facilitator superfamily domain, general substrate transporter
HINDICA_D_6412_Transcript_1/1_m.117302_len:75	IPR009580	GPI biosynthesis protein Pig-F
HINDICA_D_8853_Transcript_1/1_m.6336_len:74	IPR016196	Major facilitator superfamily domain, general substrate transporter
HINDICA_D_10988_Transcript_1/1_m.101772_len:211	IPR010480	Proteinase inhibitor I33, aspin
HINDICA_D_2842_Transcript_1/1_m.64105_len:1063	IPR002126	Cadherin
HINDICA_D_2842_Transcript_1/1_m.64105_len:1063	IPR008985	Concanavalin A-like lectin/glucanases superfamily
HINDICA_D_2842_Transcript_1/1_m.64105_len:1063	IPR015919	Cadherin-like
HINDICA_D_2842_Transcript_1/1_m.64105_len:1063	IPR002126	Cadherin
HINDICA_D_2842_Transcript_1/1_m.64105_len:1063	IPR013320	Concanavalin A-like lectin/glucanase, subgroup
HINDICA_D_6528_Transcript_1/2_m.81658_len:230	IPR012336	Thioredoxin-like fold
HINDICA_D_6528_Transcript_1/2_m.81658_len:230	IPR013766	Thioredoxin domain
HINDICA_D_6528_Transcript_1/2_m.81658_len:230	IPR012336	Thioredoxin-like fold
HINDICA_D_5703_Transcript_1/1_m.37957_len:96	IPR020901	Proteinase inhibitor I2, Kunitz, conserved site
HINDICA_D_5703_Transcript_1/1_m.37957_len:96	IPR002223	Proteinase inhibitor I2, Kunitz metazoa
HINDICA_D_354_Transcript_1/2_m.8821_len:89	IPR002557	Chitin binding domain
HINDICA_D_9725_Transcript_2/2_m.104041_len:360	IPR009283	Apyrase
HINDICA_D_7190_Transcript_1/2_m.141788_len:866	IPR013821	Potassium channel, voltage dependent, KCNQ, C-terminal
HINDICA_D_7190_Transcript_1/2_m.141788_len:866	IPR003091	Voltage-dependent potassium channel
HINDICA_D_7190_Transcript_1/2_m.141788_len:866	IPR003937	Potassium channel, voltage dependent, KCNQ
HINDICA_D_7190_Transcript_1/2_m.141788_len:866	IPR005821	Ion transport domain
HINDICA_D_4611_Transcript_1/1_m.123321_len:202	IPR016090	Phospholipase A2 domain
HINDICA_D_4611_Transcript_1/1_m.123321_len:202	IPR013090	Phospholipase A2, active site
HINDICA_D_4611_Transcript_1/1_m.123321_len:202	IPR016090	Phospholipase A2 domain
HINDICA_D_4611_Transcript_1/1_m.123321_len:202	IPR001211	Phospholipase A2
HINDICA_D_4611_Transcript_1/1_m.123321_len:202	IPR016090	Phospholipase A2 domain
HINDICA_D_9603_Transcript_1/1_m.13581_len:159	IPR023298	P-type ATPase, transmembrane domain
HINDICA_D_9603_Transcript_1/1_m.13581_len:159	IPR006068	Cation-transporting P-type ATPase, C-terminal
HINDICA_D_3055_Transcript_1/2_m.127537_len:458	IPR013032	EGF-like, conserved site
HINDICA_D_3055_Transcript_1/2_m.127537_len:458	IPR000742	Epidermal growth factor-like domain
HINDICA_D_3055_Transcript_1/2_m.127537_len:458	IPR001881	EGF-like calcium-binding domain
HINDICA_D_8250_Transcript_1/1_m.94969_len:485	IPR009003	Trypsin-like cysteine/serine peptidase domain
HINDICA_D_8250_Transcript_1/1_m.94969_len:485	IPR001254	Peptidase S1
HINDICA_D_8250_Transcript_1/1_m.94969_len:485	IPR001314	Peptidase S1A, chymotrypsin-type
HINDICA_D_8250_Transcript_1/1_m.94969_len:485	IPR001254	Peptidase S1
HINDICA_D_697_Transcript_3/4_m.168156_len:595	IPR003644	Na-Ca exchanger/integrin-beta4
HINDICA_D_697_Transcript_3/4_m.168156_len:595	IPR004837	Sodium/calcium exchanger membrane region
HINDICA_D_697_Transcript_3/4_m.168156_len:595	IPR004836	Sodium/calcium exchanger protein
HINDICA_D_697_Transcript_3/4_m.168156_len:595	IPR003644	Na-Ca exchanger/integrin-beta4
HINDICA_D_1218_Transcript_2/2_m.156941_len:517	IPR017853	Glycoside hydrolase, superfamily
HINDICA_D_1218_Transcript_2/2_m.156941_len:517	IPR001139	Glycoside hydrolase, family 30
HINDICA_D_1218_Transcript_2/2_m.156941_len:517	IPR013781	Glycoside hydrolase, catalytic domain
HINDICA_D_1218_Transcript_2/2_m.156941_len:517	IPR001139	Glycoside hydrolase, family 30
HINDICA_D_5153_Transcript_1/1_m.131287_len:545	IPR013780	Glycosyl hydrolase, family 13, all-beta
HINDICA_D_5153_Transcript_1/1_m.131287_len:545	IPR001139	Glycoside hydrolase, family 30
HINDICA_D_5153_Transcript_1/1_m.131287_len:545	IPR017853	Glycoside hydrolase, superfamily
HINDICA_D_5153_Transcript_1/1_m.131287_len:545	IPR013781	Glycoside hydrolase, catalytic domain
HINDICA_D_3079_Transcript_1/1_m.8942_len:58	IPR011598	Myc-type, basic helix-loop-helix (bHLH) domain
HINDICA_D_1077_Transcript_1/1_m.3087_len:160	IPR001179	Peptidyl-prolyl cis-trans isomerase, FKBP-type, domain
HINDICA_D_4878_Transcript_1/1_m.118355_len:544	IPR017943	Bactericidal permeability-increasing protein, alpha/beta domain
HINDICA_D_4878_Transcript_1/1_m.118355_len:544	IPR001124	Lipid-binding serum glycoprotein, C-terminal
HINDICA_D_4878_Transcript_1/1_m.118355_len:544	IPR017942	Lipid-binding serum glycoprotein, N-terminal
HINDICA_D_4878_Transcript_1/1_m.118355_len:544	IPR017943	Bactericidal permeability-increasing protein, alpha/beta domain
HINDICA_D_5606_Transcript_1/2_m.106261_len:432	IPR000560	Histidine phosphatase superfamily, clade-2
HINDICA_D_5606_Transcript_2/2_m.122633_len:432	IPR000560	Histidine phosphatase superfamily, clade-2
HINDICA_D_6046_Transcript_1/2_m.131837_len:496	IPR000175	Sodium:neurotransmitter symporter
HINDICA_D_3645_Transcript_1/1_m.85402_len:1109	IPR012337	Ribonuclease H-like domain
HINDICA_D_3645_Transcript_1/1_m.85402_len:1109	IPR001098	DNA-directed DNA polymerase, family A, palm domain
HINDICA_D_3645_Transcript_1/1_m.85402_len:1109	IPR002297	DNA-directed DNA-polymerase, family A, mitochondria
HINDICA_D_3645_Transcript_1/1_m.85402_len:1109	IPR019760	DNA-directed DNA polymerase, family A, conserved site
HINDICA_D_10300_Transcript_2/2_m.151159_len:282	IPR000182	GNAT domain
HINDICA_D_10300_Transcript_2/2_m.151159_len:282	IPR016181	Acyl-CoA N-acyltransferase
HINDICA_D_10300_Transcript_2/2_m.151159_len:282	IPR000182	GNAT domain
HINDICA_D_10300_Transcript_2/2_m.151159_len:282	IPR016181	Acyl-CoA N-acyltransferase
HINDICA_D_12407_Transcript_2/3_m.39021_len:295	IPR012999	Pyridine nucleotide-disulphide oxidoreductase, class I, active site
HINDICA_D_12407_Transcript_2/3_m.39021_len:295	IPR001327	Pyridine nucleotide-disulphide oxidoreductase, NAD-binding domain
HINDICA_D_12407_Transcript_2/3_m.39021_len:295	IPR023753	Pyridine nucleotide-disulphide oxidoreductase, FAD/NAD(P)-binding domain
HINDICA_D_12407_Transcript_2/3_m.39021_len:295	IPR013027	FAD-dependent pyridine nucleotide-disulphide oxidoreductase
HINDICA_D_2181_Transcript_1/1_m.121611_len:1312	IPR013032	EGF-like, conserved site
HINDICA_D_2181_Transcript_1/1_m.121611_len:1312	IPR003961	Fibronectin, type III
HINDICA_D_2181_Transcript_1/1_m.121611_len:1312	IPR002126	Cadherin
HINDICA_D_2181_Transcript_1/1_m.121611_len:1312	IPR015919	Cadherin-like
HINDICA_D_2181_Transcript_1/1_m.121611_len:1312	IPR001879	GPCR, family 2, extracellular hormone receptor domain
HINDICA_D_2181_Transcript_1/1_m.121611_len:1312	IPR013032	EGF-like, conserved site
HINDICA_D_145_Transcript_1/1_m.34259_len:682	IPR001025	Bromo adjacent homology (BAH) domain
HINDICA_D_145_Transcript_1/1_m.34259_len:682	IPR000949	ELM2 domain
HINDICA_D_145_Transcript_1/1_m.34259_len:682	IPR001025	Bromo adjacent homology (BAH) domain
HINDICA_D_145_Transcript_1/1_m.34259_len:682	IPR017884	SANT domain
HINDICA_D_145_Transcript_1/1_m.34259_len:682	IPR009057	Homeodomain-like
HINDICA_D_145_Transcript_1/1_m.34259_len:682	IPR001005	SANT/Myb domain
HINDICA_D_145_Transcript_1/1_m.34259_len:682	IPR001025	Bromo adjacent homology (BAH) domain
HINDICA_D_145_Transcript_1/1_m.34259_len:682	IPR000679	Zinc finger, GATA-type
HINDICA_D_145_Transcript_1/1_m.34259_len:682	IPR000949	ELM2 domain
HINDICA_D_5869_Transcript_2/2_m.149977_len:238	IPR000884	Thrombospondin, type 1 repeat
HINDICA_D_754_Transcript_1/2_m.4746_len:137	IPR015819	Lipid transport protein, beta-sheet shell
HINDICA_D_754_Transcript_1/2_m.4746_len:137	IPR015816	Vitellinogen, beta-sheet N-terminal
HINDICA_D_5064_Transcript_1/1_m.137686_len:381	IPR003582	Metridin-like ShK toxin
HINDICA_D_5064_Transcript_1/1_m.137686_len:381	IPR006202	Neurotransmitter-gated ion-channel ligand-binding
HINDICA_D_5064_Transcript_1/1_m.137686_len:381	IPR003582	Metridin-like ShK toxin
HINDICA_D_5064_Transcript_1/1_m.137686_len:381	IPR006202	Neurotransmitter-gated ion-channel ligand-binding
HINDICA_D_3747_Transcript_1/1_m.106443_len:408	IPR017214	Uncharacterised conserved protein UCP037471
HINDICA_D_3747_Transcript_1/1_m.106443_len:408	IPR006593	Cytochrome b561/ferric reductase transmembrane
HINDICA_D_3747_Transcript_1/1_m.106443_len:408	IPR005018	DOMON domain
HINDICA_D_3747_Transcript_1/1_m.106443_len:408	IPR004877	Cytochrome b561, eukaryote
HINDICA_D_3747_Transcript_1/1_m.106443_len:408	IPR005018	DOMON domain
HINDICA_D_3747_Transcript_1/1_m.106443_len:408	IPR006593	Cytochrome b561/ferric reductase transmembrane
HINDICA_D_3271_Transcript_1/1_m.114632_len:124	IPR007284	Ground-like domain
HINDICA_D_14748_Transcript_3/3_m.71472_len:149	IPR005328	Streptococcal inhibitor of complement protein
HINDICA_D_14748_Transcript_2/3_m.171277_len:149	IPR005328	Streptococcal inhibitor of complement protein
HINDICA_D_4725_Transcript_2/3_m.160855_len:464	IPR001628	Zinc finger, nuclear hormone receptor-type
HINDICA_D_4725_Transcript_2/3_m.160855_len:464	IPR000536	Nuclear hormone receptor, ligand-binding, core
HINDICA_D_4725_Transcript_2/3_m.160855_len:464	IPR008946	Nuclear hormone receptor, ligand-binding
HINDICA_D_4725_Transcript_2/3_m.160855_len:464	IPR001628	Zinc finger, nuclear hormone receptor-type
HINDICA_D_4725_Transcript_2/3_m.160855_len:464	IPR008946	Nuclear hormone receptor, ligand-binding
HINDICA_D_4725_Transcript_2/3_m.160855_len:464	IPR001628	Zinc finger, nuclear hormone receptor-type
HINDICA_D_11127_Transcript_3/3_m.154564_len:648	IPR011038	Calycin-like
HINDICA_D_11127_Transcript_3/3_m.154564_len:648	IPR012674	Calycin
HINDICA_D_8612_Transcript_1/1_m.137188_len:228	IPR001507	Zona pellucida domain
HINDICA_D_16956_Transcript_1/1_m.108091_len:129	IPR014044	CAP domain
HINDICA_D_16956_Transcript_1/1_m.108091_len:129	IPR001283	Allergen V5/Tpx-1-related
HINDICA_D_130_Transcript_2/3_m.165751_len:77	IPR002223	Proteinase inhibitor I2, Kunitz metazoa
[truncated: 376 more rows]

## Sheet: Summary List
Annotation of H. indica transcripts with SignalP- annotation summary
No. of transcripts	Interpro ID	Annotation
79	IPR013032	EGF-like, conserved site
52	IPR000742	Epidermal growth factor-like domain
50	IPR013783	Immunoglobulin-like fold
47	IPR002110	Ankyrin repeat
46	IPR020683	Ankyrin repeat-containing domain
44	IPR002172	Low-density lipoprotein (LDL) receptor class A repeat
42	IPR002049	EGF-like, laminin
40	IPR003961	Fibronectin, type III
32	IPR012336	Thioredoxin-like fold
25	IPR023415	Low-density lipoprotein (LDL) receptor class A, conserved site
24	IPR007110	Immunoglobulin-like domain
21	IPR000033	LDLR class B repeat
19	IPR000152	EGF-type aspartate/asparagine hydroxylation site
18	IPR024079	Metallopeptidase, catalytic domain
17	IPR017853	Glycoside hydrolase, superfamily
17	IPR027417	P-loop containing nucleoside triphosphate hydrolase
15	IPR000719	Protein kinase domain
15	IPR001881	EGF-like calcium-binding domain
15	IPR002227	Tyrosinase
15	IPR008211	Laminin, N-terminal
15	IPR013781	Glycoside hydrolase, catalytic domain
15	IPR018097	EGF-like calcium-binding, conserved site
14	IPR000219	Dbl homology (DH) domain
14	IPR000859	CUB domain
14	IPR020067	Frizzled domain
13	IPR000884	Thrombospondin, type 1 repeat
13	IPR001254	Peptidase S1
13	IPR002048	EF-hand domain
13	IPR002602	Domain of unknown function DB
13	IPR011992	EF-hand domain pair
13	IPR018247	EF-Hand 1, calcium-binding site
12	IPR001128	Cytochrome P450
12	IPR001611	Leucine-rich repeat
12	IPR002223	Proteinase inhibitor I2, Kunitz metazoa
12	IPR003582	Metridin-like ShK toxin
12	IPR005615	Glutathione synthase, eukaryotic
12	IPR016196	Major facilitator superfamily domain, general substrate transporter
11	IPR002477	Peptidoglycan binding-like
11	IPR003886	Nidogen, extracellular domain
11	IPR006026	Peptidase, metallopeptidase
11	IPR006202	Neurotransmitter-gated ion-channel ligand-binding
11	IPR011009	Protein kinase-like domain
11	IPR013320	Concanavalin A-like lectin/glucanase, subgroup
10	IPR008922	Uncharacterised domain, di-copper centre
10	IPR008985	Concanavalin A-like lectin/glucanases superfamily
10	IPR009030	Insulin-like growth factor binding protein, N-terminal
10	IPR013766	Thioredoxin domain
9	IPR000242	Protein-tyrosine phosphatase, receptor/non-receptor type
9	IPR000800	Notch domain
9	IPR001534	Transthyretin-like
9	IPR001806	Small GTPase superfamily
9	IPR001849	Pleckstrin homology domain
9	IPR002557	Chitin binding domain
9	IPR014044	CAP domain
9	IPR017943	Bactericidal permeability-increasing protein, alpha/beta domain
8	IPR000539	Frizzled protein
8	IPR001251	CRAL-TRIO domain
8	IPR001304	C-type lectin
8	IPR001506	Peptidase M12A, astacin
8	IPR001627	Sema domain
8	IPR002126	Cadherin
8	IPR004887	Glutathione synthase, substrate-binding, eukaryotic
8	IPR015812	Integrin beta subunit
8	IPR015943	WD40/YVTN repeat-like-containing domain
8	IPR016185	Pre-ATP-grasp domain
8	IPR017942	Lipid-binding serum glycoprotein, N-terminal
7	IPR000668	Peptidase C1A, papain C-terminal
7	IPR002219	Protein kinase C-like, phorbol ester/diacylglycerol binding
7	IPR003598	Immunoglobulin subtype 2
7	IPR003599	Immunoglobulin subtype
7	IPR006863	Erv1/Alr
7	IPR008250	P-type ATPase, A domain
7	IPR008979	Galactose-binding domain-like
7	IPR009003	Trypsin-like cysteine/serine peptidase domain
7	IPR013098	Immunoglobulin I-set
7	IPR018497	Peptidase M13, C-terminal domain
7	IPR022559	Protein of unknown function DUF2650
6	IPR000519	P-type trefoil
6	IPR001124	Lipid-binding serum glycoprotein, C-terminal
6	IPR001283	Allergen V5/Tpx-1-related
6	IPR001628	Zinc finger, nuclear hormone receptor-type
6	IPR001660	Sterile alpha motif domain
6	IPR001818	Peptidase M10, metallopeptidase
6	IPR002290	Serine/threonine- / dual specificity protein kinase, catalytic domain
6	IPR002401	Cytochrome P450, E-class, group I
6	IPR005052	Legume-like lectin
6	IPR005225	Small GTP-binding protein domain
6	IPR006029	Neurotransmitter-gated ion-channel transmembrane domain
6	IPR008197	Whey acidic protein-type 4-disulphide core
6	IPR008856	Translocon-associated protein subunit beta
6	IPR008972	Cupredoxin
6	IPR011989	Armadillo-like helical
6	IPR011990	Tetratricopeptide-like helical
6	IPR011993	Pleckstrin homology-like domain
6	IPR013126	Heat shock protein 70 family
6	IPR014042	Glutathione synthase, alpha-helical, eukaryotic
6	IPR014049	Glutathione synthase, N-terminal, eukaryotic
6	IPR014709	Glutathione synthase domain
6	IPR015919	Cadherin-like
6	IPR016024	Armadillo-type fold
6	IPR017937	Thioredoxin, conserved site
5	IPR000209	Peptidase S8/S53 domain
5	IPR000560	Histidine phosphatase superfamily, clade-2
5	IPR001079	Galectin, carbohydrate recognition domain
5	IPR001245	Serine-threonine/tyrosine-protein kinase catalytic domain
5	IPR001313	Pumilio RNA-binding repeat
5	IPR001563	Peptidase S10, serine carboxypeptidase
5	IPR001623	DnaJ domain
5	IPR001757	Cation-transporting P-type ATPase
5	IPR002200	Elicitin
5	IPR002544	FMRFamide-related peptide-like
5	IPR003591	Leucine-rich repeat, typical subtype
5	IPR003644	Na-Ca exchanger/integrin-beta4
5	IPR004709	Na+/H+ exchanger
5	IPR008271	Serine/threonine-protein kinase, active site
5	IPR008946	Nuclear hormone receptor, ligand-binding
5	IPR011038	Calycin-like
5	IPR012674	Calycin
5	IPR017986	WD40-repeat-containing domain
5	IPR020849	Small GTPase superfamily, Ras type
5	IPR021190	Peptidase M10A
4	IPR000034	Laminin B type IV
4	IPR000169	Cysteine peptidase, cysteine active site
4	IPR000504	RNA recognition motif domain
4	IPR000834	Peptidase M14, carboxypeptidase A
4	IPR000845	Nucleoside phosphorylase domain
4	IPR000889	Glutathione peroxidase
4	IPR001134	Netrin domain
4	IPR001139	Glycoside hydrolase, family 30
4	IPR001212	Somatomedin B domain
4	IPR001452	Src homology-3 domain
4	IPR001547	Glycoside hydrolase, family 5
4	IPR002130	Cyclophilin-like peptidyl-prolyl cis-trans isomerase domain
4	IPR002369	Integrin beta subunit, N-terminal
4	IPR002919	Trypsin Inhibitor-like, cysteine rich domain
4	IPR003439	ABC transporter-like
4	IPR003578	Small GTPase superfamily, Rho type
4	IPR003579	Small GTPase superfamily, Rab type
4	IPR004837	Sodium/calcium exchanger membrane region
4	IPR004843	Phosphoesterase domain
4	IPR004988	Protein of unknown function DUF273
4	IPR005479	Carbamoyl-phosphate synthetase large subunit-like, ATP-binding domain
4	IPR006201	Neurotransmitter-gated ion-channel
4	IPR006629	LPS-induced tumor necrosis factor alpha factor
4	IPR007829	TM2
4	IPR008753	Peptidase M13, N-terminal domain
4	IPR009009	RlpA-like double-psi beta-barrel domain
4	IPR010513	KEN domain
4	IPR011001	Saposin-like
4	IPR011078	Uncharacterised protein family UPF0001
4	IPR011991	Winged helix-turn-helix DNA-binding domain
4	IPR012896	Integrin beta subunit, tail
4	IPR013057	Amino acid transporter, transmembrane
4	IPR013083	Zinc finger, RING/FYVE/PHD-type
4	IPR013816	ATP-grasp fold, subdomain 2
4	IPR014756	Immunoglobulin E-set
4	IPR016090	Phospholipase A2 domain
4	IPR016179	Insulin-like
4	IPR017441	Protein kinase, ATP binding site
4	IPR017873	Cysteine-rich Golgi apparatus protein 1 repeat, eukaryote
4	IPR017981	GPCR, family 2-like
4	IPR018087	Glycoside hydrolase, family 5, conserved site
4	IPR018120	Glycoside hydrolase, family 1, active site
4	IPR018181	Heat shock protein 70, conserved site
4	IPR018933	Netrin module, non-TIMP type
4	IPR019783	Ribosome maturation protein SBDS, N-terminal
4	IPR023214	HAD-like domain
4	IPR023299	P-type ATPase, cytoplasmic domain N
3	IPR000120	Amidase
3	IPR000175	Sodium:neurotransmitter symporter
3	IPR000306	FYVE zinc finger
3	IPR000322	Glycoside hydrolase, family 31
3	IPR000326	Phosphatidic acid phosphatase type 2/haloperoxidase
3	IPR000387	Protein-tyrosine/Dual specificity phosphatase
3	IPR000536	Nuclear hormone receptor, ligand-binding, core
3	IPR000608	Ubiquitin-conjugating enzyme, E2
3	IPR000795	Elongation factor, GTP-binding domain
3	IPR000980	SH2 domain
3	IPR001025	Bromo adjacent homology (BAH) domain
3	IPR001314	Peptidase S1A, chymotrypsin-type
3	IPR001507	Zona pellucida domain
3	IPR001680	WD40 repeat
3	IPR001762	Blood coagulation inhibitor, Disintegrin
3	IPR001791	Laminin G domain
3	IPR001813	Ribosomal protein L10/L12
3	IPR001991	Sodium:dicarboxylate symporter
3	IPR002394	Nicotinic acetylcholine receptor
3	IPR002474	Carbamoyl-phosphate synthase, small subunit N-terminal domain
3	IPR003146	Proteinase inhibitor, carboxypeptidase propeptide
3	IPR003172	MD-2-related lipid-recognition domain
3	IPR003593	AAA+ ATPase domain
3	IPR004836	Sodium/calcium exchanger protein
3	IPR005018	DOMON domain
3	IPR005135	Endonuclease/exonuclease/phosphatase
3	IPR005480	Carbamoyl-phosphate synthetase, large subunit oligomerisation domain
3	IPR005804	Fatty acid desaturase, type 1
3	IPR006153	Cation/H+ exchanger
3	IPR006597	Sel1-like
3	IPR006605	G2 nidogen/fibulin G2F
3	IPR006620	Prolyl 4-hydroxylase, alpha subunit
3	IPR007484	Peptidase M28
3	IPR008266	Tyrosine-protein kinase, active site
3	IPR008952	Tetraspanin, EC2 domain
3	IPR008993	Tissue inhibitor of metalloproteinases-like, OB-fold
3	IPR009057	Homeodomain-like
3	IPR010044	Methylthioadenosine phosphorylase (MTAP)
3	IPR011013	Galactose mutarotase-like domain
3	IPR011510	Sterile alpha motif, type 2
3	IPR011527	ABC transporter, transmembrane domain, type 1
3	IPR011607	Methylglyoxal synthase-like domain
3	IPR012677	Nucleotide-binding, alpha-beta plait
3	IPR013162	CD80-like, immunoglobulin C2-set
3	IPR013547	Prolyl 4-hydroxylase alpha-subunit, N-terminal
3	IPR013761	Sterile alpha motif/pointed domain
3	IPR013800	STAT transcription factor, all-alpha
3	IPR015816	Vitellinogen, beta-sheet N-terminal
3	IPR015819	Lipid transport protein, beta-sheet shell
3	IPR016040	NAD(P)-binding domain
3	IPR016135	Ubiquitin-conjugating enzyme/RWD-like
3	IPR016186	C-type lectin-like
3	IPR016187	C-type lectin fold
3	IPR016201	Plexin-like fold
3	IPR017905	ERV/ALR sulphydryl oxidase
3	IPR017940	ABC transporter, integral membrane type 1
3	IPR018000	Neurotransmitter-gated ion-channel, conserved site
3	IPR018020	Oxo-4-hydroxy-4-carboxy-5-ureidoimidazoline decarboxylase
3	IPR018303	P-type ATPase, phosphorylation site
3	IPR018499	Tetraspanin/Peripherin
3	IPR020846	Major facilitator superfamily domain
3	IPR020892	Cyclophilin-type peptidyl-prolyl cis-trans isomerase, conserved site
3	IPR023631	Amidase signature domain
3	IPR025660	Cysteine peptidase, histidine active site
3	IPR027361	Nicotinic acetylcholine-gated receptor, transmembrane domain
3	IPR027534	Ribosomal protein L12 family
2	IPR000182	GNAT domain
2	IPR000483	Cysteine-rich flanking region, C-terminal
2	IPR000494	EGF receptor, L domain
2	IPR000640	Translation elongation factor EFG, V domain
2	IPR000933	Glycoside hydrolase, family 29
2	IPR000949	ELM2 domain
2	IPR001090	Ephrin receptor ligand binding domain
2	IPR001173	Glycosyl transferase, family 2
2	IPR001223	Glycoside hydrolase, family 18, catalytic domain
2	IPR001327	Pyridine nucleotide-disulphide oxidoreductase, NAD-binding domain
2	IPR001331	Guanine-nucleotide dissociation stimulator, CDC24, conserved site
2	IPR001356	Homeobox domain
2	IPR001360	Glycoside hydrolase, family 1
2	IPR001590	Peptidase M12B, ADAM/reprolysin
2	IPR001608	Alanine racemase, N-terminal
2	IPR001650	Helicase, C-terminal
2	IPR001661	Glycoside hydrolase, family 37
2	IPR001747	Lipid transport protein, N-terminal
2	IPR001820	Proteinase inhibitor I35, tissue inhibitor of metalloproteinase
2	IPR001841	Zinc finger, RING-type
2	IPR001863	Glypican
2	IPR001893	Cysteine-rich Golgi apparatus protein 1 repeat
2	IPR001919	Cellulose-binding domain, family II, bacterial-type
2	IPR001936	Ras GTPase-activating protein
2	IPR002007	Haem peroxidase, animal
2	IPR002014	VHS
2	IPR002018	Carboxylesterase, type B
2	IPR002035	von Willebrand factor, type A
2	IPR002119	Histone H2A
2	IPR002213	UDP-glucuronosyl/UDP-glucosyltransferase
2	IPR002486	Nematode cuticle collagen, N-terminal
2	IPR002659	Glycosyl transferase, family 31
2	IPR002884	Proprotein convertase, P
2	IPR002893	Zinc finger, MYND-type
2	IPR002909	IPT domain
2	IPR003091	Voltage-dependent potassium channel
2	IPR003245	Plastocyanin-like
2	IPR003594	Histidine kinase-like ATPase, ATP-binding domain
2	IPR003595	Protein-tyrosine phosphatase, catalytic
2	IPR003609	Apple-like
2	IPR003859	Beta-1,4-galactosyltransferase
2	IPR003937	Potassium channel, voltage dependent, KCNQ
2	IPR004014	Cation-transporting P-type ATPase, N-terminal
2	IPR004083	Regulatory associated protein of TOR
2	IPR004240	Nonaspanin (TM9SF)
2	IPR004296	Protein of unknown function DUF236
2	IPR005045	Protein of unknown function DUF284, transmembrane eukaryotic
2	IPR005328	Streptococcal inhibitor of complement protein
2	IPR005533	AMOP
2	IPR005821	Ion transport domain
2	IPR005828	General substrate transporter
2	IPR006068	Cation-transporting P-type ATPase, C-terminal
2	IPR006091	Acyl-CoA oxidase/dehydrogenase, central domain
2	IPR006149	EB domain
2	IPR006274	Carbamoyl-phosphate synthase, small subunit
2	IPR006297	Elongation factor 4
2	IPR006567	PUG domain
2	IPR006593	Cytochrome b561/ferric reductase transmembrane
2	IPR006816	Engulfment/cell motility, ELMO
2	IPR007284	Ground-like domain
2	IPR007373	Thiamin pyrophosphokinase, vitamin B1-binding domain
2	IPR007688	Conjugal transfer, TrbL/VirB6
2	IPR008160	Collagen triple helix repeat
2	IPR008427	Extracellular membrane protein, CFEM domain
2	IPR008465	Dystroglycan
2	IPR008710	Nicastrin
2	IPR008795	Prominin
2	IPR008936	Rho GTPase activation protein
2	IPR008942	ENTH/VHS
2	IPR008965	Carbohydrate-binding domain
2	IPR008967	p53-like transcription factor, DNA-binding
2	IPR008970	Collagen-binding surface protein Cna, B-type domain
2	IPR009020	Proteinase inhibitor, propeptide
2	IPR009038	GOLD
2	IPR009060	UBA-like
2	IPR009580	GPI biosynthesis protein Pig-F
2	IPR010400	PITH domain
2	IPR010480	Proteinase inhibitor I33, aspin
2	IPR010509	ABC transporter, N-terminal
2	IPR010558	Caenorhabditis elegans ly-6-related
2	IPR011011	Zinc finger, FYVE/PHD-type
2	IPR011042	Six-bladed beta-propeller, TolB-like
2	IPR011047	Quinonprotein alcohol dehydrogenase-like superfamily
2	IPR011056	Peptidase S24/S26A/S26B/S26C, beta-ribbon domain
2	IPR011178	Amyloidogenic glycoprotein, copper-binding
2	IPR011583	Chitinase II
2	IPR011701	Major facilitator superfamily
2	IPR011761	ATP-grasp fold
2	IPR012291	Cellulose-binding family II/chitobiase, carbohydrate-binding domain
2	IPR012345	STAT transcription factor, DNA-binding, subdomain
2	IPR012999	Pyridine nucleotide-disulphide oxidoreductase, class I, active site
2	IPR013026	Tetratricopeptide repeat-containing domain
2	IPR013027	FAD-dependent pyridine nucleotide-disulphide oxidoreductase
2	IPR013111	EGF-like domain, extracellular
2	IPR013201	Proteinase inhibitor I29, cathepsin propeptide
2	IPR013780	Glycosyl hydrolase, family 13, all-beta
2	IPR013821	Potassium channel, voltage dependent, KCNQ, C-terminal
2	IPR014001	Helicase, superfamily 1/2, ATP-binding domain
2	IPR014005	Extracellular membrane protein, CFEM domain, fungi
2	IPR014733	Barwin-like endoglucanase
2	IPR014836	Integrin beta subunit, cytoplasmic domain
2	IPR015424	Pyridoxal phosphate-dependent transferase
2	IPR015500	Peptidase S8, subtilisin-related
2	IPR015927	Peptidase S24/S26A/S26B/S26C
2	IPR015988	STAT transcription factor, coiled coil
2	IPR016118	Phosphatidic acid phosphatase/chloroperoxidase, N-terminal
2	IPR016130	Protein-tyrosine phosphatase, active site
2	IPR016158	Cullin homology
2	IPR016181	Acyl-CoA N-acyltransferase
2	IPR017455	Zinc finger, FYVE-related
2	IPR017580	2-oxo-4-hydroxy-4-carboxy-5-ureidoimidazoline decarboxylase, type 1
2	IPR017871	ABC transporter, conserved site
2	IPR017926	Glutamine amidotransferase
2	IPR018023	Ribosome maturation protein SBDS, conserved site
2	IPR018031	Laminin B, subgroup
2	IPR018107	Sodium:dicarboxylate symporter, conserved site
2	IPR018159	Spectrin/alpha-actinin
2	IPR018253	DnaJ domain, conserved site
2	IPR018391	Pyrrolo-quinoline quinone beta-propeller repeat
2	IPR019756	Peptidase S26A, signal peptidase I, serine active site
2	IPR019759	Peptidase S24/S26A/S26B
2	IPR022398	Peptidase S8, subtilisin, His-active site
2	IPR022591	Transcription initiation factor TFIID subunit 1, domain of unknown function
2	IPR023298	P-type ATPase, transmembrane domain
2	IPR023753	Pyridine nucleotide-disulphide oxidoreductase, FAD/NAD(P)-binding domain
2	IPR023798	Ribosomal protein S7 domain
2	IPR023827	Peptidase S8, subtilisin, Asp-active site
2	IPR023828	Peptidase S8, subtilisin, Ser-active site
2	IPR024078	Putative deacetylase LmbE-like domain
2	IPR024156	Small GTPase superfamily, ARF type
2	IPR024329	Amyloidogenic glycoprotein, E2 domain
2	IPR025258	Domain of unknown function DUF4206
2	IPR025705	Beta-hexosaminidase subunit alpha/beta
2	IPR026147	Rab3 GTPase-activating protein catalytic subunit
2	IPR027295	Quinonprotein alcohol dehydrogenase-like domain
2	IPR027791	Galactosyltransferase, C-terminal domain
2	IPR027995	Glycosyl transferase group 7, N-terminal
1	IPR000008	C2 calcium-dependent membrane targeting
1	IPR000010	Proteinase inhibitor I25, cystatin
1	IPR000020	Anaphylatoxin/fibulin
1	IPR000047	Helix-turn-helix motif
1	IPR000073	Alpha/beta hydrolase fold-1
1	IPR000101	Gamma-glutamyltranspeptidase
1	IPR000276	G protein-coupled receptor, rhodopsin-like
1	IPR000330	SNF2-related
1	IPR000407	Nucleoside phosphatase GDA1/CD39
1	IPR000425	Major intrinsic protein
1	IPR000449	Ubiquitin-associated domain/translation elongation factor EF-Ts, N-terminal
1	IPR000462	CDP-alcohol phosphatidyltransferase
1	IPR000472	TGF-beta receptor/activin receptor, type I/II
1	IPR000542	Acyltransferase ChoActase/COT/CPT
1	IPR000557	Calponin repeat
1	IPR000571	Zinc finger, CCCH-type
1	IPR000642	Peptidase M41
1	IPR000679	Zinc finger, GATA-type
1	IPR000717	Proteasome component (PCI) domain
1	IPR000960	Flavin monooxygenase FMO
1	IPR001005	SANT/Myb domain
1	IPR001098	DNA-directed DNA polymerase, family A, palm domain
1	IPR001117	Multicopper oxidase, type 1
1	IPR001140	ABC transporter, transmembrane domain
1	IPR001166	Crustacean neurohormone
1	IPR001179	Peptidyl-prolyl cis-trans isomerase, FKBP-type, domain
1	IPR001190	SRCR domain
1	IPR001211	Phospholipase A2
1	IPR001214	SET domain
1	IPR001345	Phosphoglycerate/bisphosphoglycerate mutase, active site
1	IPR001349	Cytochrome c oxidase, subunit VIa
1	IPR001373	Cullin, N-terminal
1	IPR001377	Ribosomal protein S6e
1	IPR001404	Heat shock protein Hsp90 family
1	IPR001424	Superoxide dismutase, copper/zinc binding domain
1	IPR001503	Glycosyl transferase, family 10
1	IPR001509	NAD-dependent epimerase/dehydratase
1	IPR001579	Glycoside hydrolase, chitinase active site
1	IPR001580	Calreticulin/calnexin
1	IPR001715	Calponin homology domain
1	IPR001723	Steroid hormone receptor
1	IPR001781	Zinc finger, LIM-type
1	IPR001816	Translation elongation factor EFTs/EF1B
1	IPR001879	GPCR, family 2, extracellular hormone receptor domain
1	IPR001932	Protein phosphatase 2C (PP2C)-like domain
1	IPR002041	Ran GTPase
1	IPR002053	Glycoside hydrolase, family 25
1	IPR002072	Nerve growth factor-related
1	IPR002140	Ribosome maturation protein SBDS
1	IPR002160	Proteinase inhibitor I3, Kunitz legume
1	IPR002165	Plexin
1	IPR002229	Blood group Rhesus C/E/D polypeptide
1	IPR002297	DNA-directed DNA-polymerase, family A, mitochondria
1	IPR002350	Kazal domain
1	IPR002413	Ves allergen
1	IPR002524	Cation efflux protein
1	IPR002619	Domain of unknown function CX
1	IPR002816	Pheromone shutdown, TraB
1	IPR002861	Reeler domain
1	IPR002937	Amine oxidase
1	IPR002939	Chaperone DnaJ, C-terminal
1	IPR003000	Sirtuin family
1	IPR003014	PAN-1 domain
1	IPR003096	Smooth muscle protein/calponin
1	IPR003378	Fringe-like
1	IPR003384	Hepatitis E virus Orf2, capsid
1	IPR003406	Glycosyl transferase, family 14
1	IPR003437	Glycine cleavage system P protein, homodimeric
1	IPR003596	Immunoglobulin V-set, subgroup
1	IPR003659	Plexin/semaphorin/integrin
1	IPR003663	Sugar/inositol transporter
1	IPR003689	Zinc/iron permease
1	IPR003726	Homocysteine S-methyltransferase
1	IPR003737	N-acetylglucosaminyl phosphatidylinositol deacetylase
1	IPR003903	Ubiquitin interacting motif
1	IPR003954	RNA recognition motif domain, eukaryote
1	IPR003959	ATPase, AAA-type, core
1	IPR004039	Rubredoxin-type fold
1	IPR004087	K Homology domain
1	IPR004088	K Homology domain, type 1
1	IPR004161	Translation elongation factor EFTu/EF1A, domain 2
1	IPR004344	Tubulin-tyrosine ligase/Tubulin polyglutamylase
1	IPR004403	Peptide chain release factor eRF1/aRF1
1	IPR004443	YjeF N-terminal domain
1	IPR004689	UDP-galactose transporter
1	IPR004841	Amino acid permease/ SLC12A domain
1	IPR004877	Cytochrome b561, eukaryote
1	IPR004898	Pectate lyase, catalytic
1	IPR004911	Gamma interferon inducible lysosomal thiol reductase GILT
1	IPR004947	Deoxyribonuclease II
1	IPR005013	Dolichyl-diphosphooligosaccharide--protein glycosyltransferase subunit WBP1
1	IPR005016	TMS membrane protein/tumour differentially expressed protein
1	IPR005123	Oxoglutarate/iron-dependent dioxygenase
1	IPR005140	eRF1 domain 1/Pelota-like
1	IPR005141	eRF1 domain 2
1	IPR005481	Carbamoyl-phosphate synthase, large subunit, N-terminal
1	IPR005483	Carbamoyl-phosphate synthase large subunit, CPSase domain
1	IPR005746	Thioredoxin
1	IPR005788	Disulphide isomerase
1	IPR005829	Sugar transporter, conserved site
1	IPR006073	GTP binding domain
1	IPR006075	Aspartyl/Glutamyl-tRNA(Gln) amidotransferase, subunit B/E, catalytic
1	IPR006089	Acyl-CoA dehydrogenase, conserved site
1	IPR006121	Heavy metal-associated domain, HMA
1	IPR006186	Serine/threonine-specific protein phosphatase/bis(5-nucleosyl)-tetraphosphatase
1	IPR006211	Furin-like cysteine-rich domain
1	IPR006222	Glycine cleavage T-protein, N-terminal
1	IPR006275	Carbamoyl-phosphate synthase, large subunit
1	IPR006311	Twin-arginine translocation pathway, signal sequence
1	IPR006539	Phospholipid-transporting P-type ATPase, subfamily IV
1	IPR006639	Presenilin/signal peptide peptidase
1	IPR006689	Small GTPase superfamily, ARF/SAR type
1	IPR006692	Coatomer, WD associated region
1	IPR006693	Partial AB-hydrolase lipase domain
1	IPR006931	Calcipressin
1	IPR007087	Zinc finger, C2H2
1	IPR007125	Histone core
1	IPR007217	Per1-like
1	IPR007222	Signal recognition particle receptor, alpha subunit, N-terminal
1	IPR007237	CD20-like
1	IPR007266	Endoplasmic reticulum oxidoreductin 1
1	IPR007271	Nucleotide-sugar transporter
1	IPR007369	Peptidase A22B, signal peptide peptidase
1	IPR007371	Thiamin pyrophosphokinase, catalytic domain
1	IPR007526	SWIRM domain
1	IPR007621	TPM domain
1	IPR007873	Glycosyltransferase, ALG3
1	IPR007967	Protein of unknown function DUF727
1	IPR008081	Cytoplasmic FMR1-interacting
1	IPR008139	Saposin B
1	IPR008154	Amyloidogenic glycoprotein, extracellular
1	IPR008253	Marvel domain
1	IPR008509	Protein of unknown function DUF791
1	IPR008516	Na,K-Atpase Interacting protein
1	IPR008597	Destabilase
1	IPR008758	Peptidase S28
1	IPR008826	Selenium-binding protein
1	IPR008853	TMEM9
1	IPR008907	P25-alpha
1	IPR008928	Six-hairpin glycosidase-like
1	IPR008969	Carboxypeptidase-like, regulatory domain
1	IPR008971	HSP40/DnaJ peptide-binding
1	IPR008973	C2 calcium/lipid-binding domain, CaLB
1	IPR009000	Translation elongation/initiation factor/Ribosomal, beta-barrel
1	IPR009017	Green fluorescent protein
1	IPR009022	Elongation factor G, III-V domain
1	IPR009072	Histone-fold
1	IPR009100	Acyl-CoA dehydrogenase/oxidase
1	IPR009283	Apyrase
1	IPR010255	Haem peroxidase
1	IPR010497	Epoxide hydrolase, N-terminal
1	IPR011012	Longin-like domain
1	IPR011050	Pectin lyase fold/virulence factor
1	IPR011065	Kunitz inhibitor ST1-like
1	IPR011160	Sphingomyelin phosphodiesterase
1	IPR011489	EMI domain
1	IPR011547	Sulphate transporter
1	IPR011598	Myc-type, basic helix-loop-helix (bHLH) domain
1	IPR011633	Protein of unknown function DUF1602
1	IPR011656	Notch, NODP domain
1	IPR011706	Multicopper oxidase, type 2
1	IPR011707	Multicopper oxidase, type 3
1	IPR011893	Selenoprotein, Rdx type
1	IPR012143	Dimethylaniline monooxygenase, N-oxide-forming
1	IPR012317	Poly(ADP-ribose) polymerase, catalytic domain
1	IPR012334	Pectin lyase fold
1	IPR012337	Ribonuclease H-like domain
1	IPR012908	GPI inositol-deacylase PGAP1-like
1	IPR012913	Glucosidase II beta subunit-like
1	IPR012919	Sad1/UNC-like, C-terminal
1	IPR013015	Laminin IV
1	IPR013078	Histidine phosphatase superfamily, clade-1
1	IPR013088	Zinc finger, NHR/GATA-type
1	IPR013090	Phospholipase A2, active site
1	IPR013143	PCI/PINT associated module
1	IPR013548	Plexin, cytoplasmic RasGAP domain
1	IPR013586	26S proteasome regulatory subunit, C-terminal
1	IPR013657	UAA transporter
1	IPR013740	Redoxin
1	IPR013763	Cyclin-like
1	IPR013786	Acyl-CoA dehydrogenase/oxidase, N-terminal
1	IPR013815	ATP-grasp fold, subdomain 1
1	IPR013842	GTP-binding protein LepA, C-terminal
1	IPR013926	CGI121/TPRKB
1	IPR014010	Egg jelly receptor, REJ-like
1	IPR014039	Translation elongation factor EFTs/EF1B, dimerisation
1	IPR014766	Carboxypeptidase, regulatory domain
1	IPR015421	Pyridoxal phosphate-dependent transferase, major region, subdomain 1
1	IPR015849	Amyloidogenic glycoprotein, heparin-binding
1	IPR015880	Zinc finger, C2H2-like
1	IPR015883	Glycoside hydrolase family 20, catalytic core
1	IPR016017	GDNF/GAS1
1	IPR016093	MIR motif
1	IPR016159	Cullin repeat-like-containing domain
1	IPR016167	FAD-binding, type 2, subdomain 1
1	IPR016286	Glycoside hydrolase, family 29, bacteria/metazoa/fungi
1	IPR017214	Uncharacterised conserved protein UCP037471
1	IPR017452	GPCR, rhodopsin-like, 7TM
1	IPR017703	YgfZ/GcvT conserved site
1	IPR017884	SANT domain
1	IPR017896	4Fe-4S ferredoxin-type, iron-sulpur binding domain
1	IPR017907	Zinc finger, RING-type, conserved site
1	IPR017969	Heavy-metal-associated, conserved site
1	IPR017970	Homeobox, conserved site
1	IPR017972	Cytochrome P450, conserved site
1	IPR017978	GPCR, family 3, C-terminal
1	IPR018101	Translation elongation factor Ts, conserved site
1	IPR018108	Mitochondrial substrate/solute carrier
1	IPR018114	Peptidase S1, trypsin family, active site
1	IPR018124	Calreticulin/calnexin, conserved site
1	IPR018152	Superoxide dismutase, copper/zinc, binding site
1	IPR018202	Peptidase S10, serine carboxypeptidase, active site
1	IPR018205	VHS subgroup
1	IPR018232	Glycoside hydrolase, family 37, conserved site
1	IPR018244	Allergen V5/Tpx-1-related, conserved site
1	IPR018282	Ribosomal protein S6e, conserved site
1	IPR018378	C-type lectin, conserved site
1	IPR018937	Magnesium transporter
1	IPR018957	Zinc finger, C3HC4 RING-type
1	IPR018978	Ribosome maturation protein SBDS, C-terminal
1	IPR019128	Sister chromatid cohesion protein Dcc1
1	IPR019378	GDP-fucose protein O-fucosyltransferase
1	IPR019537	Transmembrane protein 65
1	IPR019545	DM13 domain
1	IPR019559	Cullin protein, neddylation domain
1	IPR019577	SPARC/Testican, calcium-binding domain
1	IPR019744	Amyloidogenic glycoprotein, extracellular domain conserved site
1	IPR019760	DNA-directed DNA polymerase, family A, conserved site
1	IPR019775	WD40 repeat, conserved site
1	IPR019791	Haem peroxidase, animal, subgroup
1	IPR019805	Heat shock protein Hsp90, conserved site
1	IPR019826	Carboxylesterase type B, active site
1	IPR020454	Diacylglycerol/phorbol-ester binding
1	IPR020472	G-protein beta WD-40 repeat
1	IPR020479	Homeodomain, metazoa
1	IPR020546	ATPase, F1 complex, delta/epsilon subunit, N-terminal
1	IPR020556	Amidase, conserved site
1	IPR020575	Heat shock protein Hsp90, N-terminal
1	IPR020580	Glycine cleavage system P-protein, N-terminal
1	IPR020635	Tyrosine-protein kinase, catalytic domain
1	IPR020719	RNA 3'-terminal phosphate cyclase-like, conserved site
1	IPR020894	Cadherin conserved site
1	IPR020901	Proteinase inhibitor I2, Kunitz, conserved site
1	IPR020946	Flavin monooxygenase-like
1	IPR021133	HEAT, type 2
1	IPR021852	Domain of unknown function DUF3456
1	IPR021930	Heparan sulphate-N-deacetylase
1	IPR022023	U1 small nuclear ribonucleoprotein of 70kDa N-terminal
1	IPR022707	Domain of unknown function DUF3535
1	IPR022764	Peptidase S54, rhomboid domain
1	IPR023231	GSKIP/TIF31 domain
1	IPR023271	Aquaporin-like
1	IPR023395	Mitochondrial carrier domain
1	IPR023413	Green fluorescent protein-like
1	IPR023416	Transthyretin/hydroxyisourate hydrolase, superfamily
1	IPR024041	Ammonium transporter AmtB-like domain
1	IPR024049	Peptide Chain Release Factor eRF1/aRF1, N-terminal
1	IPR024725	E3 ubiquitin ligase EDD, ubiquitin-associated domain
1	IPR024936	Cyclophilin-type peptidyl-prolyl cis-trans isomerase
1	IPR025483	Lipase, eukaryotic
1	IPR025661	Cysteine peptidase, asparagine active site
1	IPR025875	Leucine rich repeat 4
1	IPR025887	Glycoside hydrolase family 31, N-terminal domain
1	IPR026590	Sirtuin family, catalytic core domain
1	IPR026591	Sirtuin family, catalytic core small domain
1	IPR026823	Complement Clr-like EGF domain
1	IPR026906	Leucine rich repeat 5
1	IPR026966	Neurofascin/L1/NrCAM, C-terminal domain
1	IPR027007	DHR-1 domain
1	IPR027256	Cation-transporting P-type ATPase, subfamily IB
1	IPR028082	Periplasmic binding protein-like I
1	IPR028146	Glucosidase II beta subunit, N-terminal
